# Supplementary material
Source: PubMed Central journal article supplement (PMC7048697)
Supplement: 41588_2014_BFng3010_MOESM64_ESM.pdf [file 41588_2014_BFng3010_MOESM64_ESM.pdf]

# Supplementary Information

## Whipworm genome and dual-species transcriptome analyses provide molecular insights into an intimate host-parasite interaction

Bernardo J. Foth, Isheng J. Tsai, Adam J. Reid, Allison J. Bancroft, Sarah Nichol, Alan Tracey, Nancy Holroyd, James A. Cotton, Eleanor J. Stanley, Magdalena Zarowiecki, Jimmy Z. Liu, Thomas Huckvale, Philip J. Cooper, Richard K. Grencis, Matthew Berriman

|                                                                                 |           |
|---------------------------------------------------------------------------------|-----------|
| <b>I. SUPPLEMENTARY FIGURES</b> .....                                           | <b>3</b>  |
| Supplementary Fig. 1 .....                                                      | 3         |
| Supplementary Fig. 2 .....                                                      | 4         |
| Supplementary Fig. 3 .....                                                      | 8         |
| Supplementary Fig. 4 .....                                                      | 9         |
| Supplementary Fig. 5 .....                                                      | 24        |
| Supplementary Fig. 6 .....                                                      | 25        |
| Supplementary Fig. 7 .....                                                      | 26        |
| Supplementary Fig. 8 .....                                                      | 27        |
| <b>II. SUPPLEMENTARY TABLES</b> .....                                           | <b>28</b> |
| Supplementary Table 2 .....                                                     | 28        |
| Supplementary Table 3 .....                                                     | 31        |
| Supplementary Table 11 .....                                                    | 47        |
| Supplementary Table 15 .....                                                    | 48        |
| Supplementary Table 16 .....                                                    | 49        |
| <b>III. SUPPLEMENTARY NOTE</b> .....                                            | <b>51</b> |
| <i>Trichuris muris</i> genome sequencing .....                                  | <b>51</b> |
| Illumina .....                                                                  | 51        |
| Male and female samples .....                                                   | 52        |
| 454 .....                                                                       | 52        |
| Optical map .....                                                               | <b>52</b> |
| <i>T. muris</i> genome assembly and improvement .....                           | <b>53</b> |
| <i>T. trichiura</i> genome sequencing .....                                     | <b>54</b> |
| <i>T. trichiura</i> genome assembly and improvement .....                       | <b>54</b> |
| Transcriptome sequencing - <i>T. muris</i> .....                                | <b>55</b> |
| Gene predictions .....                                                          | <b>56</b> |
| <i>T. muris</i> .....                                                           | 56        |
| <i>T. trichiura</i> .....                                                       | 57        |
| Functional gene annotation .....                                                | <b>58</b> |
| Gene family clustering and phylogenetic analysis .....                          | <b>59</b> |
| Chromosome-level analysis .....                                                 | <b>60</b> |
| Assigning chromosomal linkage groups by gene orthology .....                    | 60        |
| Calculating read coverage and heterozygosity .....                              | 61        |
| Read coverage to infer chromosomal location and estimate sequence lengths ..... | 61        |
| X chromosome .....                                                              | 62        |
| Shared female/male .....                                                        | 62        |
| Y chromosome .....                                                              | 63        |
| Centromeres .....                                                               | 63        |
| Gene expression analysis - <i>T. muris</i> .....                                | <b>64</b> |
| Identification of novel drug targets .....                                      | <b>65</b> |

|                                               |           |
|-----------------------------------------------|-----------|
| <b>Transcriptome sequencing - mouse</b> ..... | <b>66</b> |
| <b>Gene expression analysis - mouse</b> ..... | <b>67</b> |
| <b>GWAS analysis</b> .....                    | <b>67</b> |
| <b>References</b> .....                       | <b>69</b> |

## I. SUPPLEMENTARY FIGURES

Supplementary Figure 1

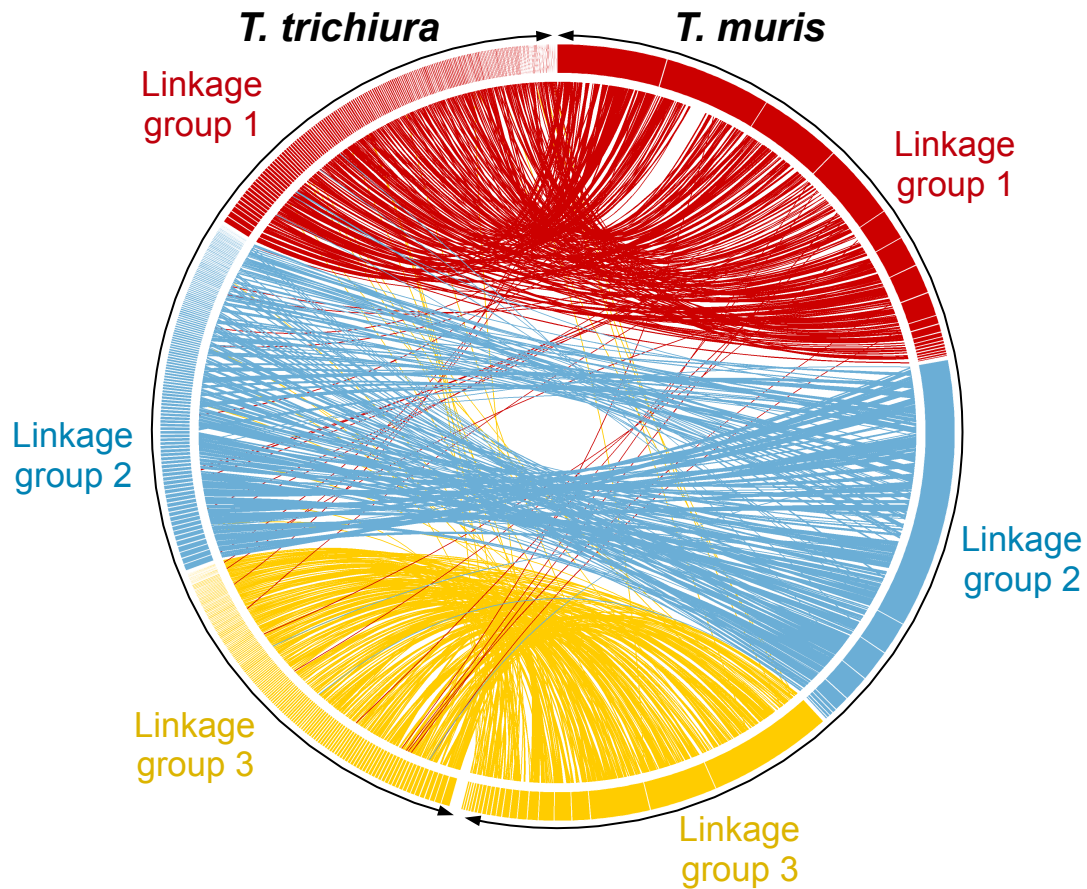

**Supplementary Figure 1 High-level synteny between the genomes of *T. trichiura* and *T. muris*.** Mapping one-to-one gene orthologs between genome scaffolds of *T. trichiura* (genome assembly v2.1) and *T. muris* (genome assembly v4) followed by clustering of the resulting ortholog pattern identifies three large linkage groups in each genome. Linkage group three (yellow) is putatively identified as sex-specific chromosome(s).

# Supplementary Figure 2a-c

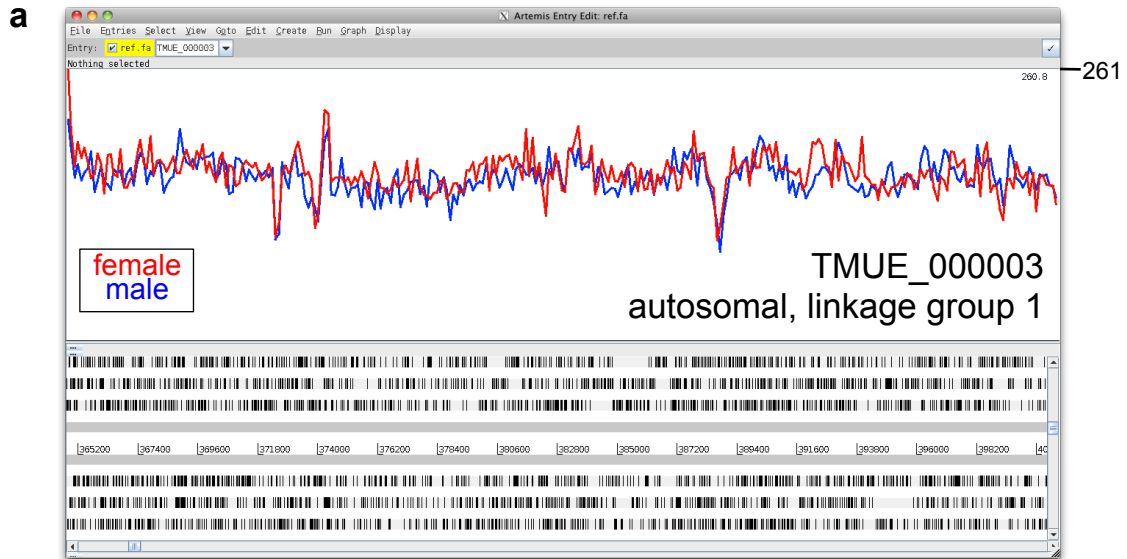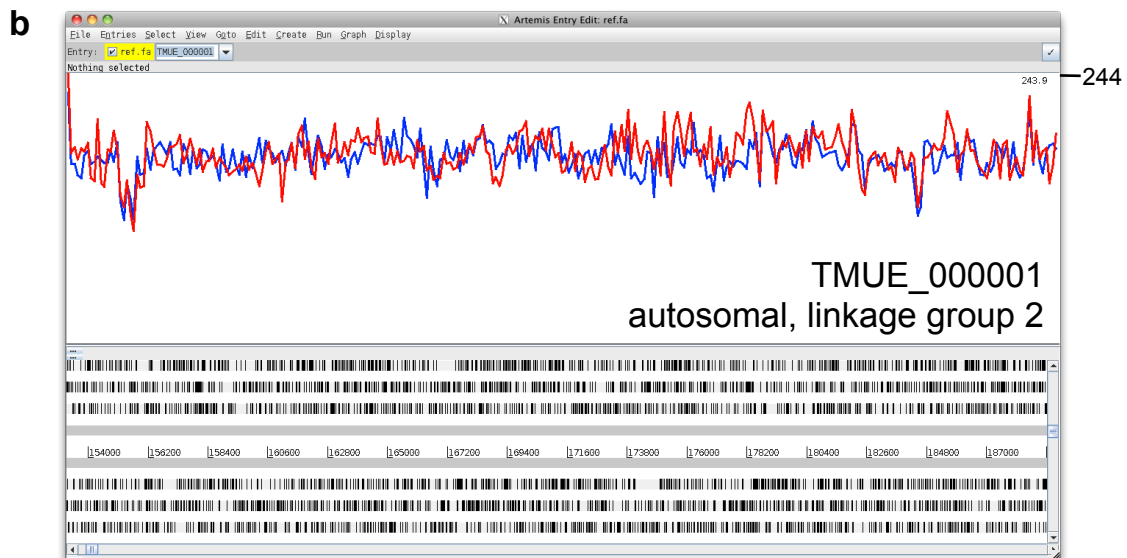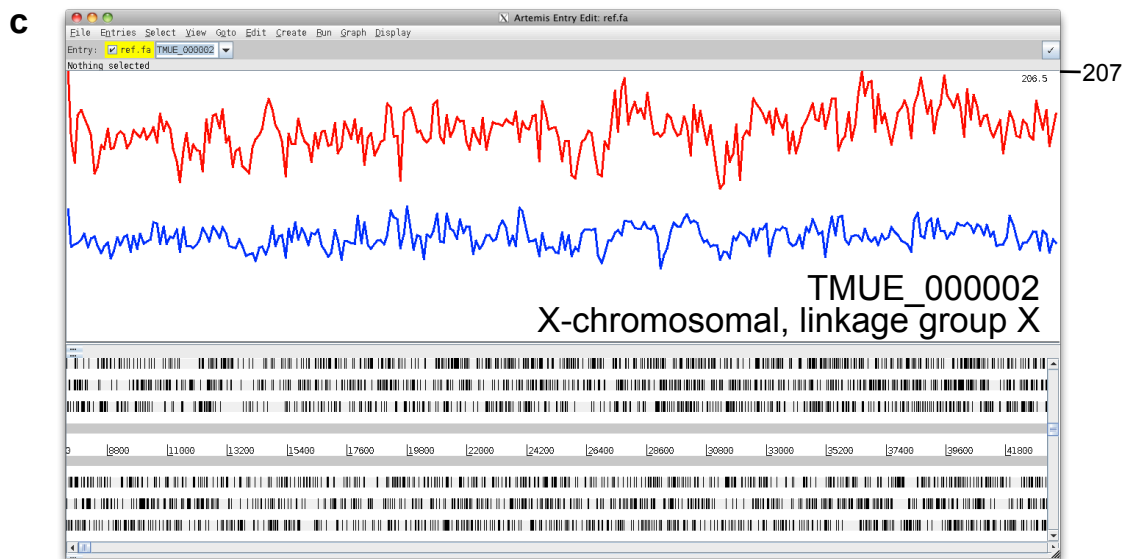



## Supplementary Figure 2d-f

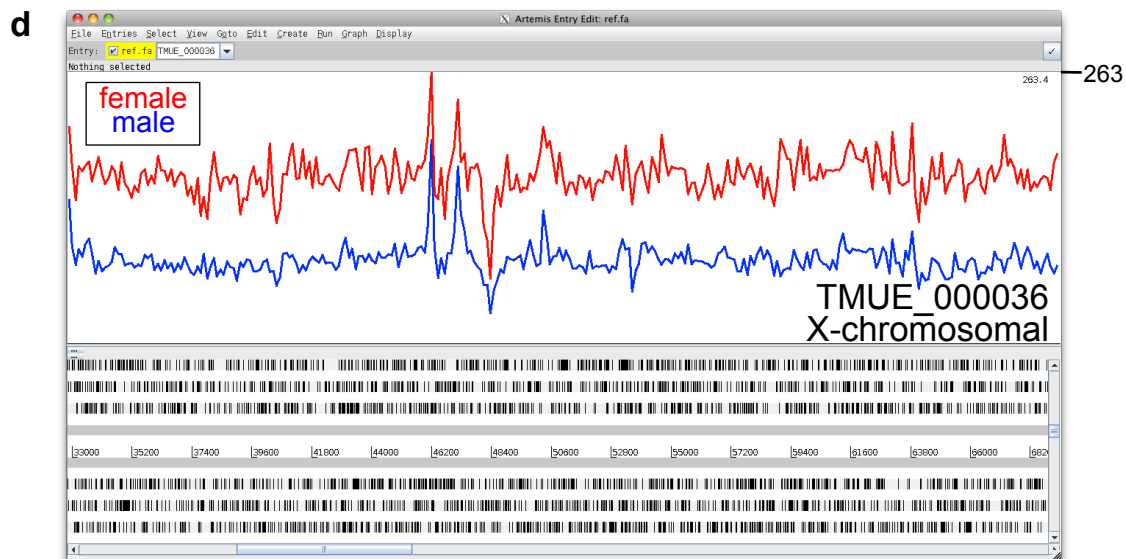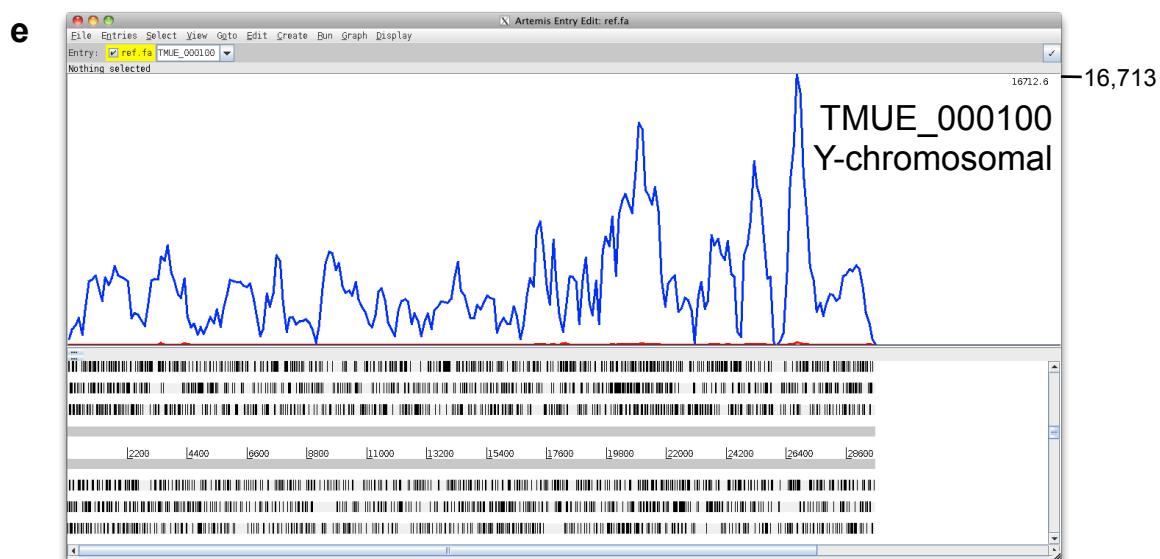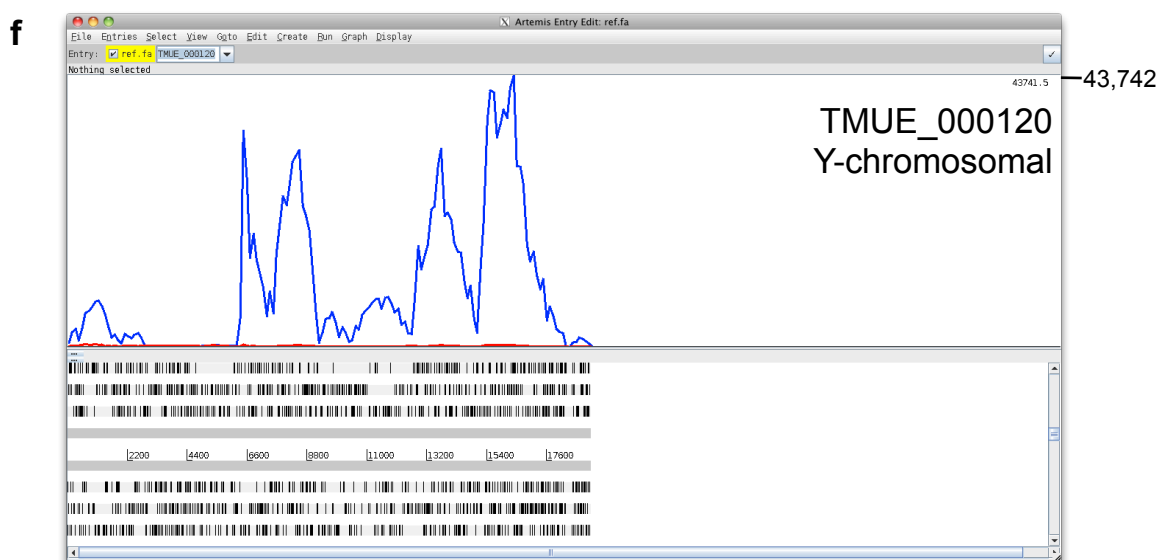

## Supplementary Figure 2g-i

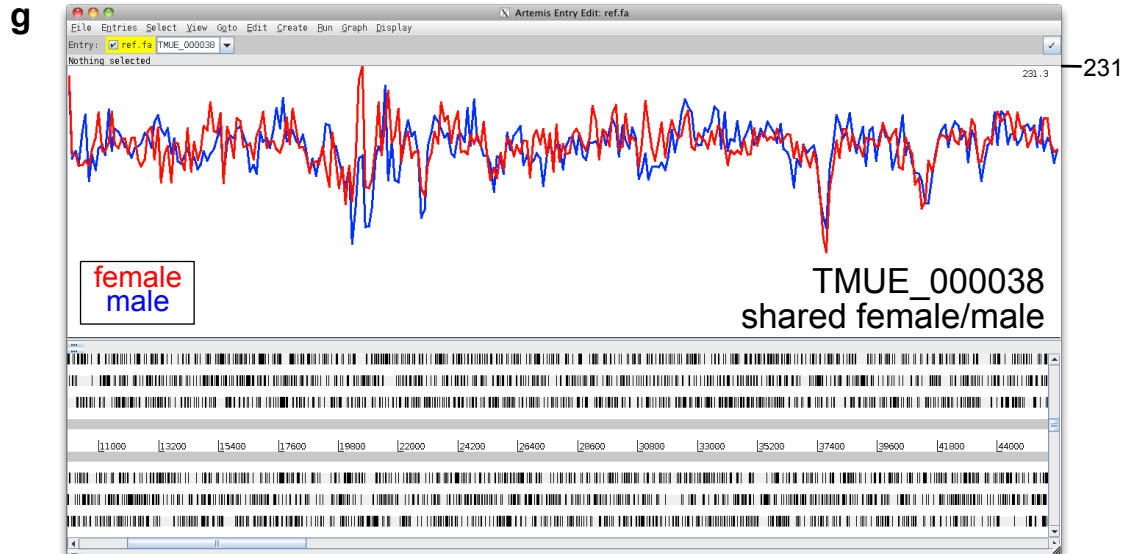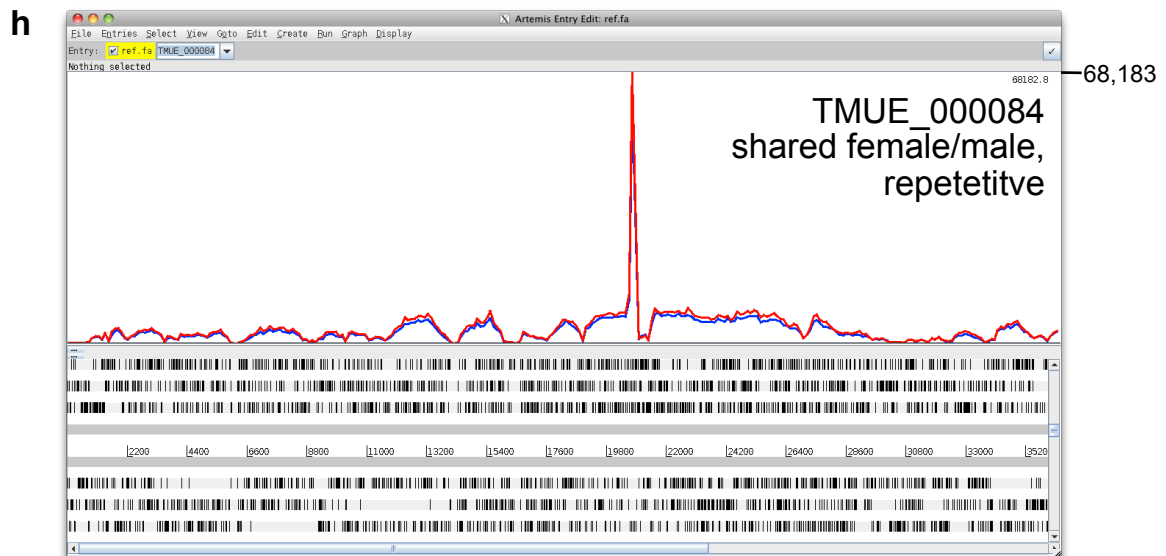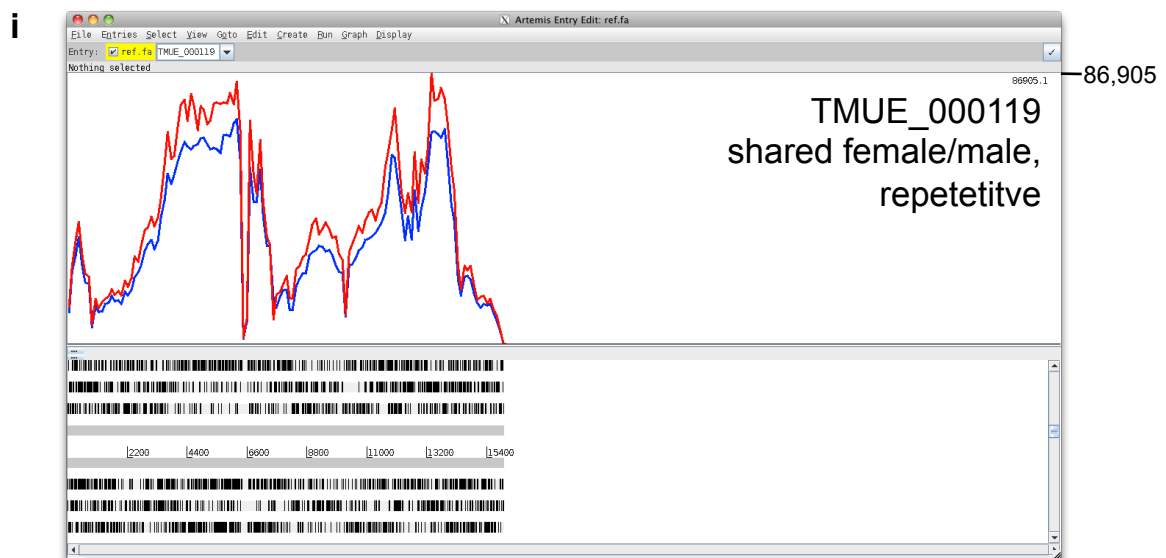

## Supplementary Figure 2j-l

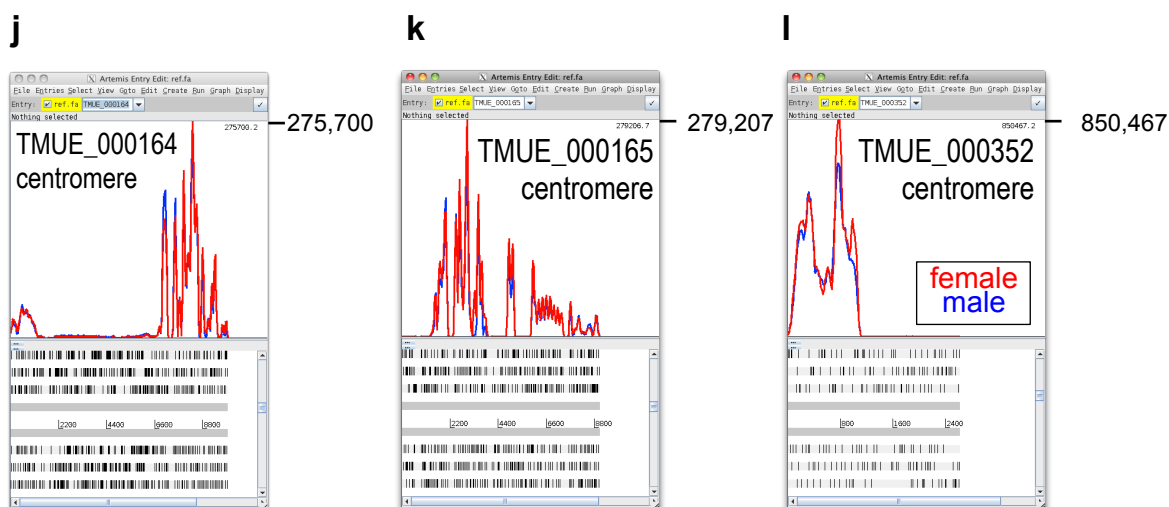

**Supplementary Figure 2 Illustration of typical high-throughput sequence read coverage over different chromosomal locations.** Shown are Artemis screenshots of Illumina data mapped to *T. muris* genome assembly v4. (a-c) The three scaffolds have been assigned to three linkage groups based on orthology of genes to *Trichinella spiralis*. Scaffolds TMUE\_000003 and TMUE\_000001 represent autosomes and show equal read coverage in females (median coverage 152) and males (median coverage 151). In contrast, scaffold TMUE\_000002 represents the X chromosome with the coverage in males (blue, median coverage 76) being half that in females (red, median coverage 149). (d) Scaffold TMUE\_000036 has been inferred to be X-chromosomal based on read coverage. (e,f) Scaffolds inferred to represent the Y chromosome based on read coverage, with the very high read coverage indicating highly repetitive sequence content. Taking actual mean read coverage over scaffold TMUE\_000120 (on average 58.4x higher than over the disomic autosomes), scaffold length (19.2kb), and the monosomic nature of the Y chromosome (compensated for by multiplication by two) into account suggests a true “uncollapsed” length of this sequence of approximately 2.24 Mb. (g-i) Scaffolds that occur in approximately equal proportions in females and males and that have not been assigned to a linkage group based on gene orthology. These scaffolds may represent sequences located on autosomes or shared between the X and the Y chromosomes. Scaffolds TMUE\_000084 and TMUE\_000119 attract very high read coverage indicating highly repetitive sequence content. Taking actual mean read coverage and scaffold length into account suggests a true “uncollapsed” length of approximately 3.67 Mb for the sequence represented by scaffold TMUE\_000119. (j-l) Three scaffolds that attract very high read coverage indicating highly repetitive sequence content. Sequence analysis suggests that the highly repetitive sequences of these scaffolds are centromeric (see Supplementary Fig. 3). Taking mean read coverage into account suggests that these three scaffolds together represent approximately 5.33 Mb of “uncollapsed” sequence.

### Supplementary Figure 3

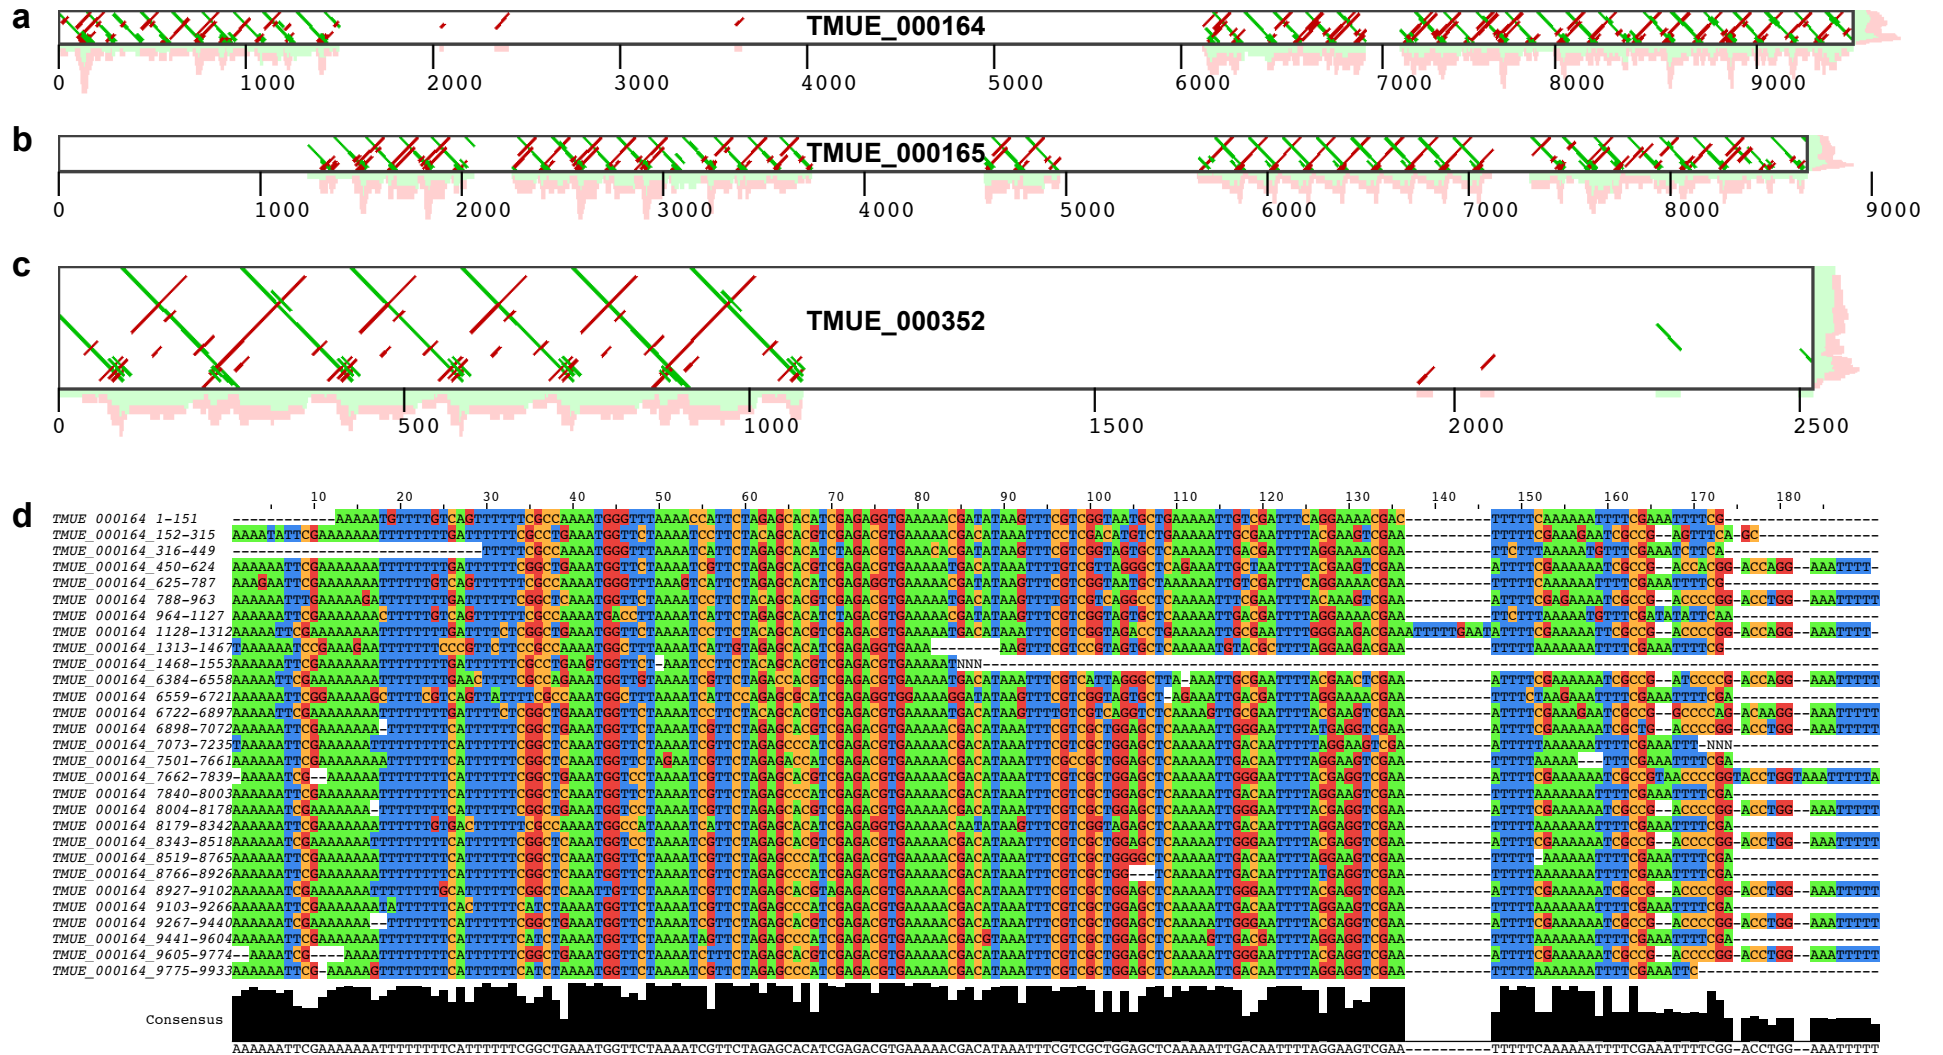

**Supplementary Figure 3** Sequence analysis putatively identifies centromeric sequences. (a-c) Dot-plots comparing the putative centromeric consensus sequence (see bottom of figure panel d) against scaffolds TMUE\_000164, TMUE\_000165 and TMUE\_000352 illustrate the repetitive nature of these sequences. Green indicates forward matches, and red indicates reverse matches. (d) Multiple sequence alignment of the putative centromeric monomers present in scaffold TMUE\_000164. The repeating monomers are mostly either 164bp or 176bp long, which is comparable to the length of the ~171bp-long monomers of human centromeric alpha-satellite DNA. The monomers found in scaffolds TMUE\_000165 and TMUE\_000352 are nearly identical to those from scaffold TMUE\_000164. See also Supplementary Figure 2j-l.

## Supplementary Figure 4a

**WAP domain (PF00095) containing proteins (most in MEROPS family I17):** strongly expressed in the anterior region of adult whipworms and in L3 larvae, and likely secreted (signal peptide present) in most cases.

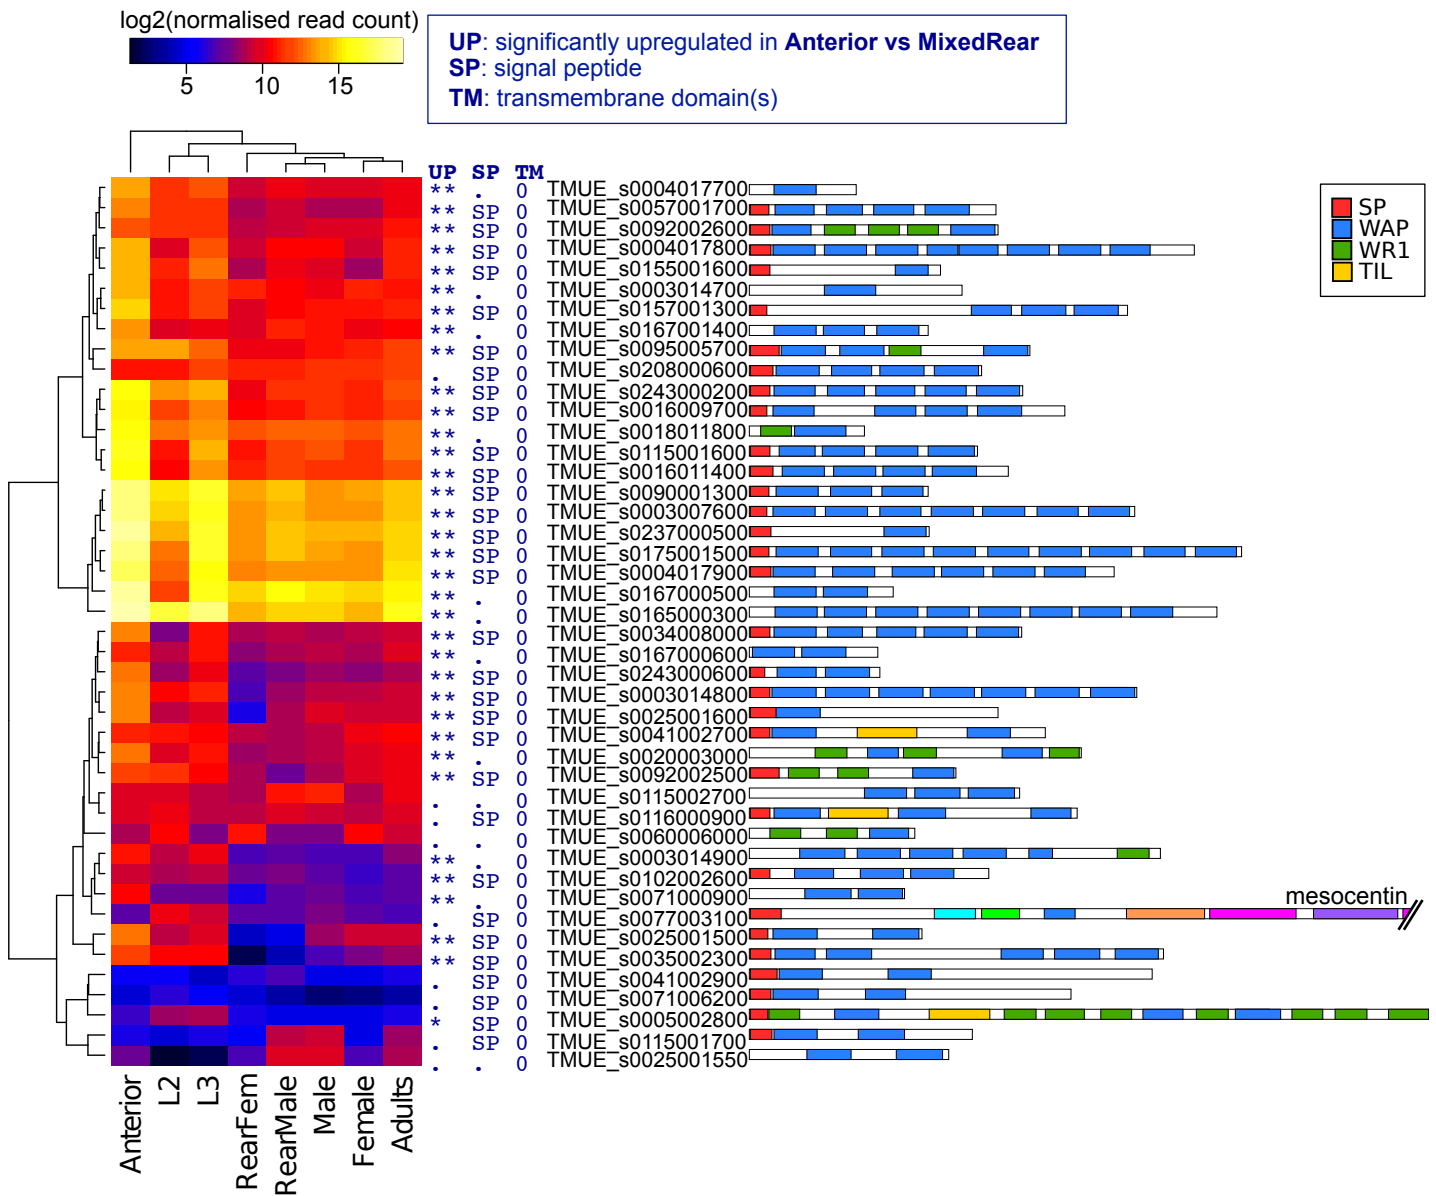

**Note:** all WAP domain-containing proteins are annotated as “WAP domain containing protein, SLPI-like”, except:

TMUE\_s0077003100 **Mesocentin**

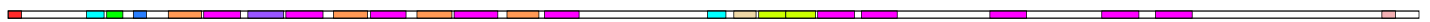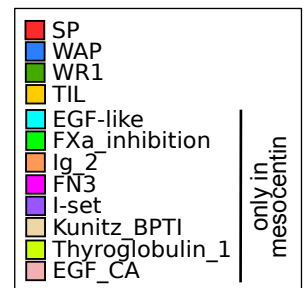

**Supplementary Figure 4** Transcript-level expression of several gene groups of *T. muris*. Normalised transcript levels of several groups of functionally related genes in *T. muris* comparing parasite tissues, genders, and life cycle stages. The indication of significant transcriptional upregulation in a particular pairwise comparison (“UP”) refers to a false discovery rate (FDR)  $\leq 0.01$  and  $\text{FDR} > 1\text{E-}5$  when denoted by one asterisk (\*), and to an  $\text{FDR} \leq 1\text{E-}5$  when denoted by two asterisks (\*\*). Supplementary Figs. 4a and 4b are detailed versions of Figs. 3a and 4a in the main text, respectively.

## Supplementary Figure 4b

**DNase II (PF03265) proteins:** tend to be most strongly expressed in the anterior region of adult whipworms and in larvae, and some are likely secreted.

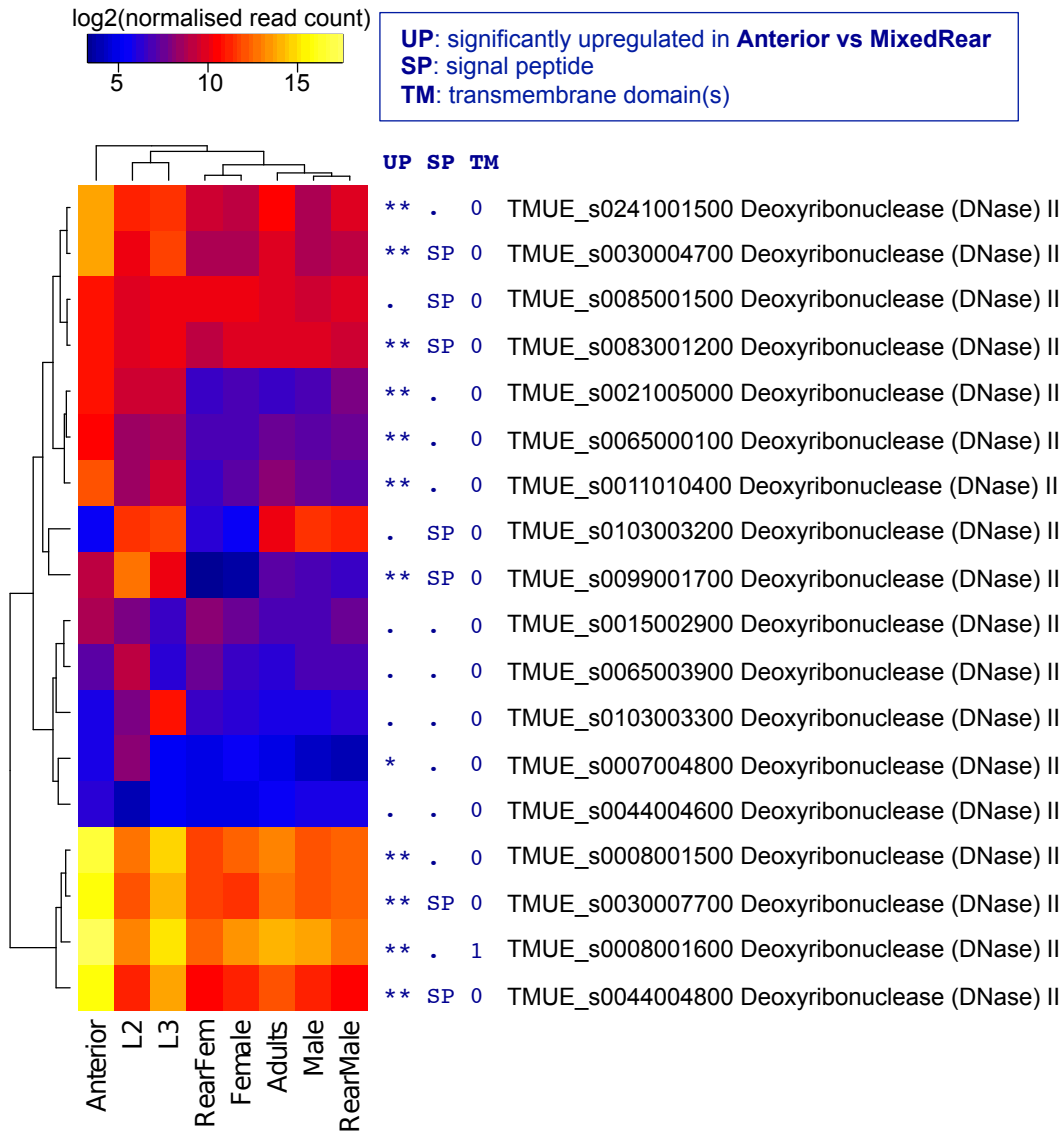

### Supplementary Figure 4c

**Chymotrypsin-like serine proteases (MEROPS family S1A):** tend to be strongly expressed in the anterior region of adult whipworms and in larvae, and most are likely secreted.

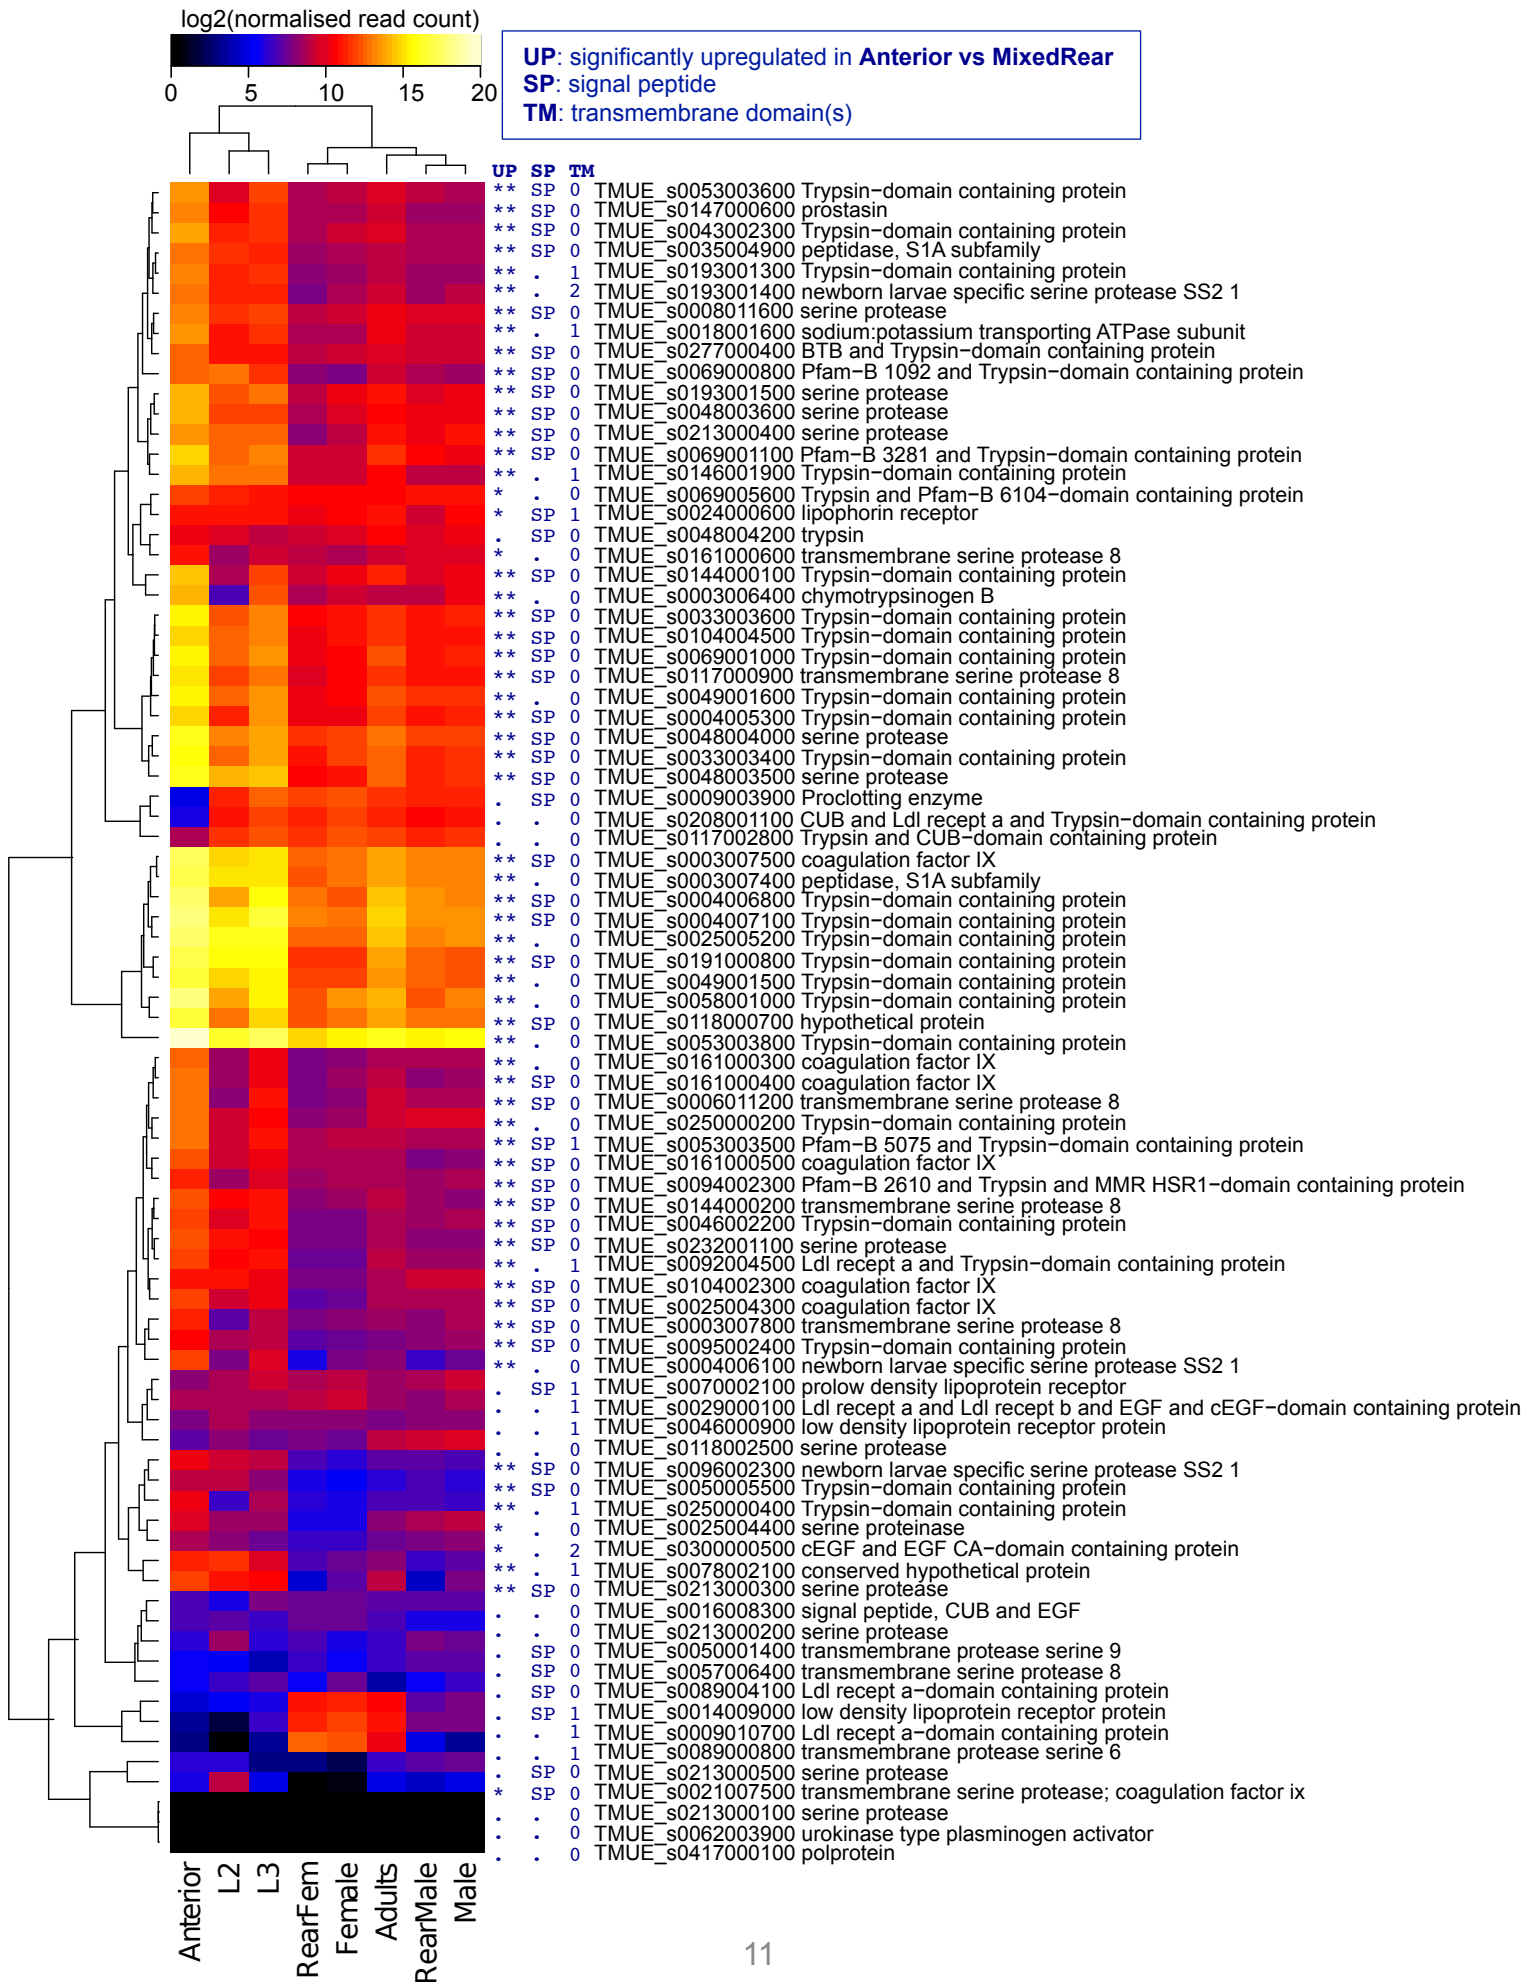



## Supplementary Figure 4d

**Serine proteases (MEROPS family S9):** with no strong group-wide differential expression pattern, with few secreted proteins, and with 1-3 transmembrane domains in the majority of cases.

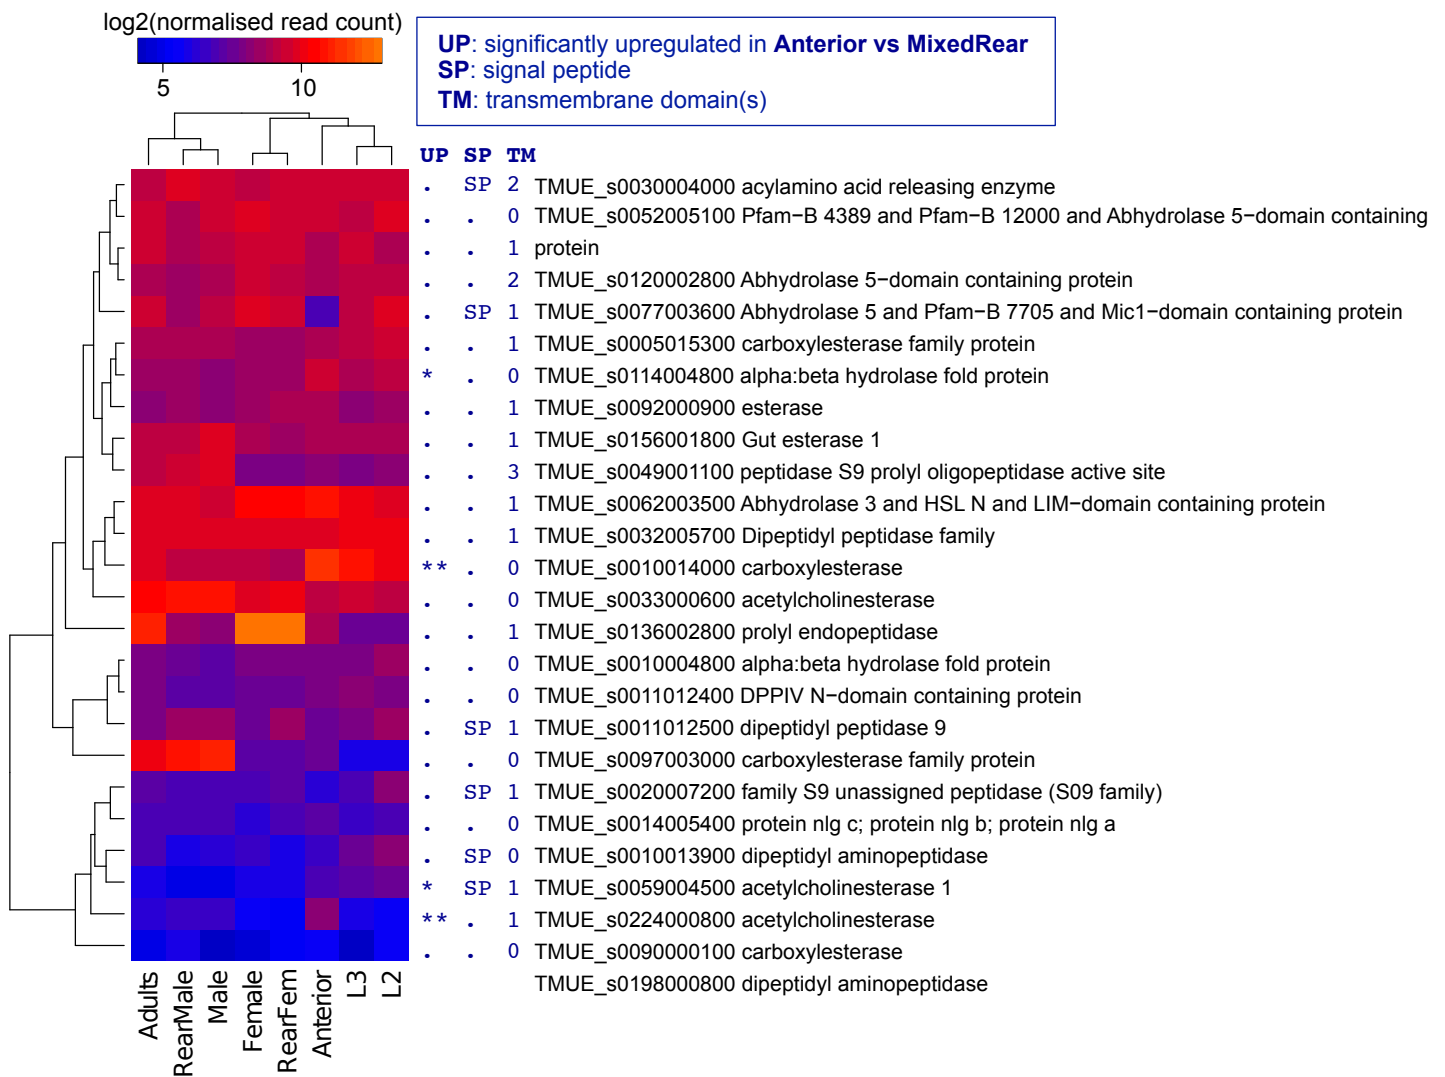



## Supplementary Figure 4e

**Cysteine proteases: no strong group-wide differential expression pattern and few secreted proteins.**

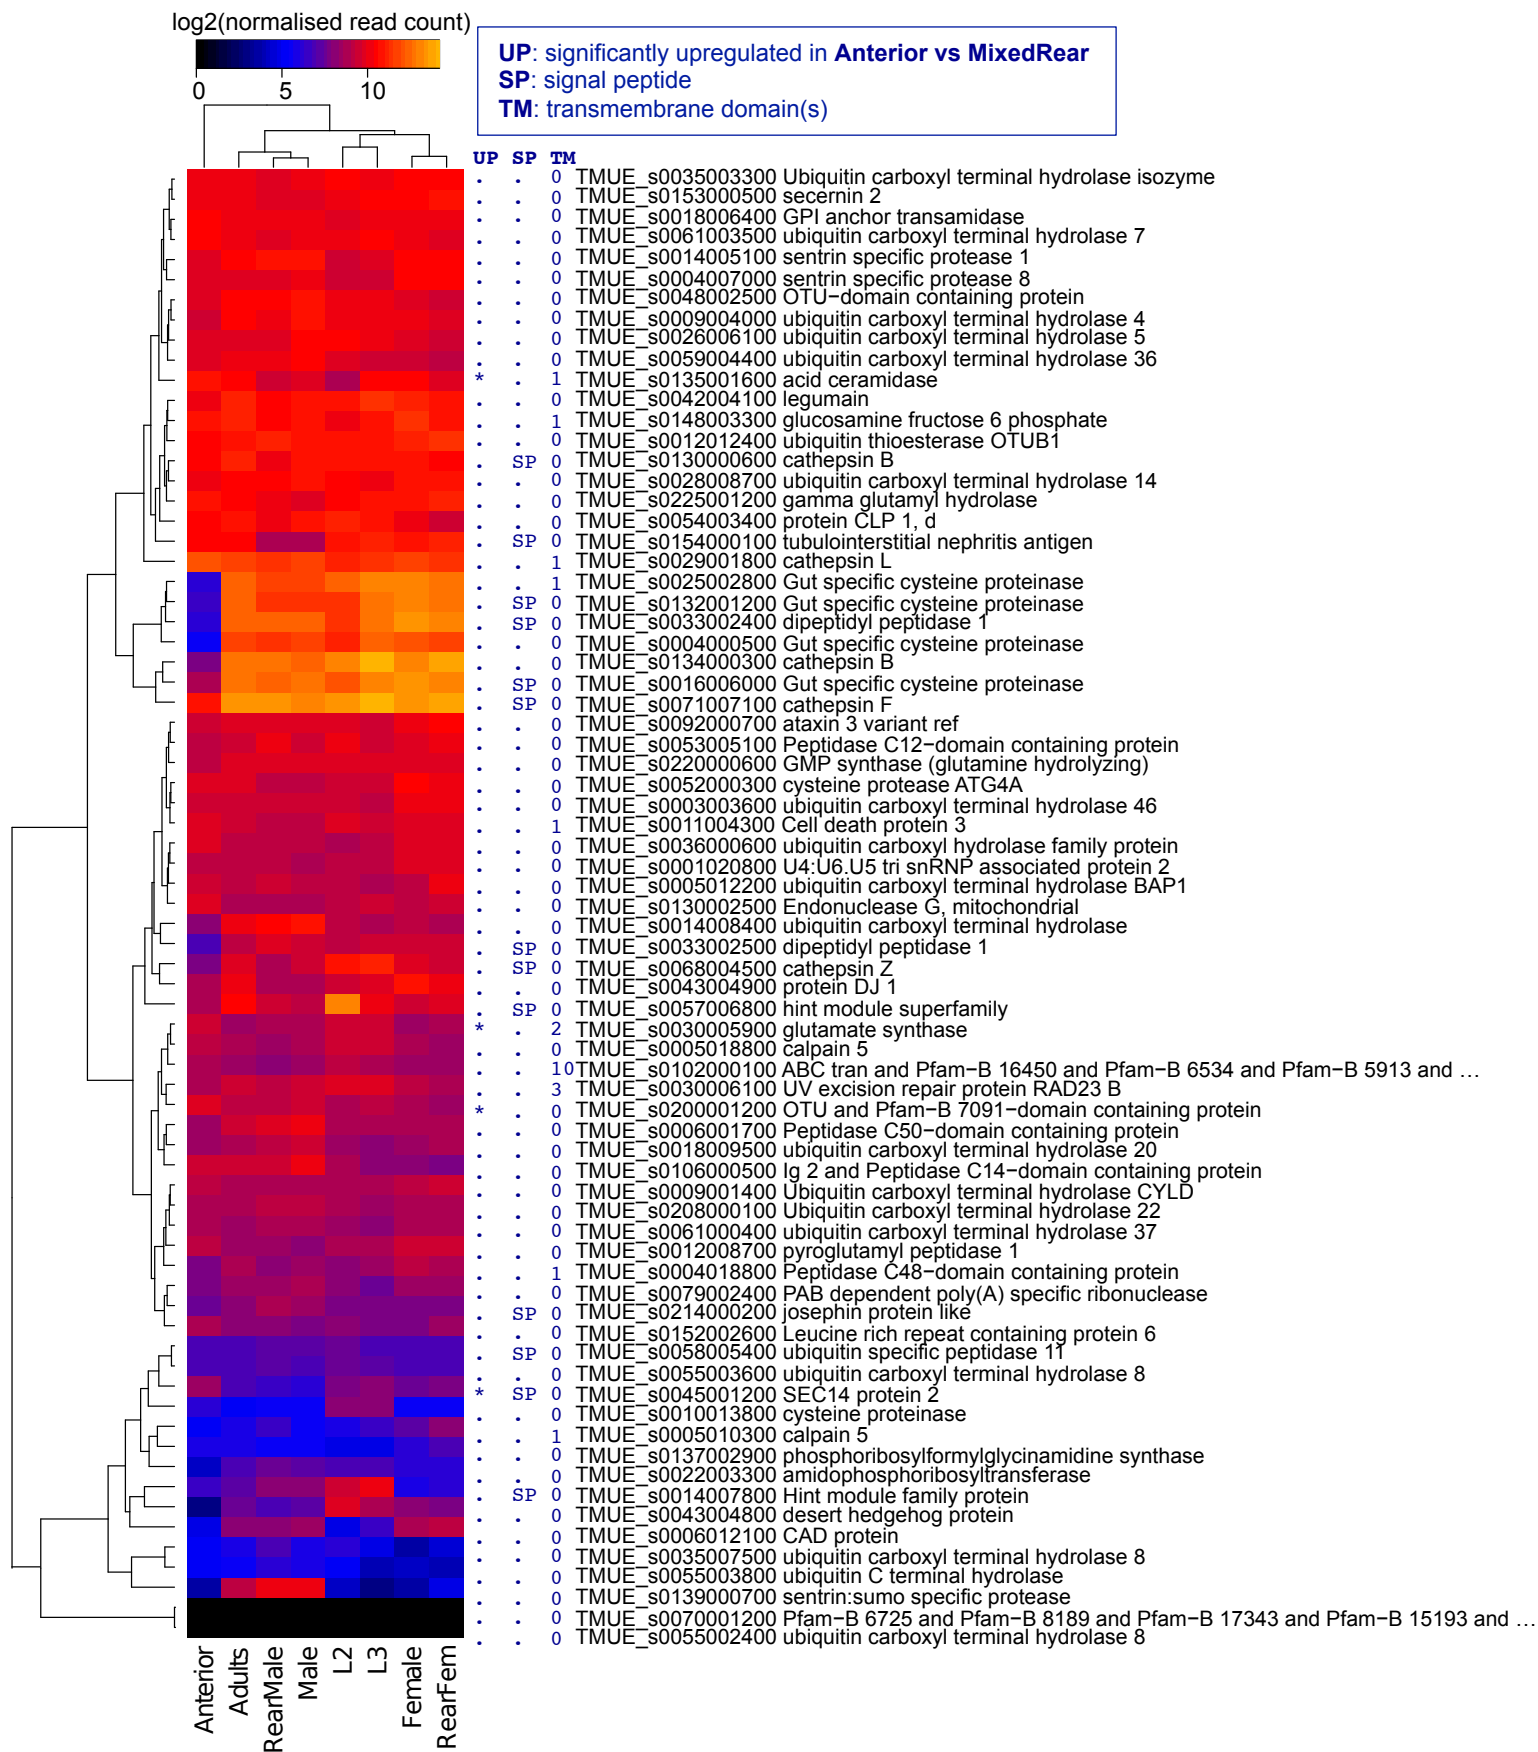

## Supplementary Figure 4f

Protease inhibitors (in addition to MEROPS family I17): with no strong group-wide differential expression pattern and some secreted proteins.

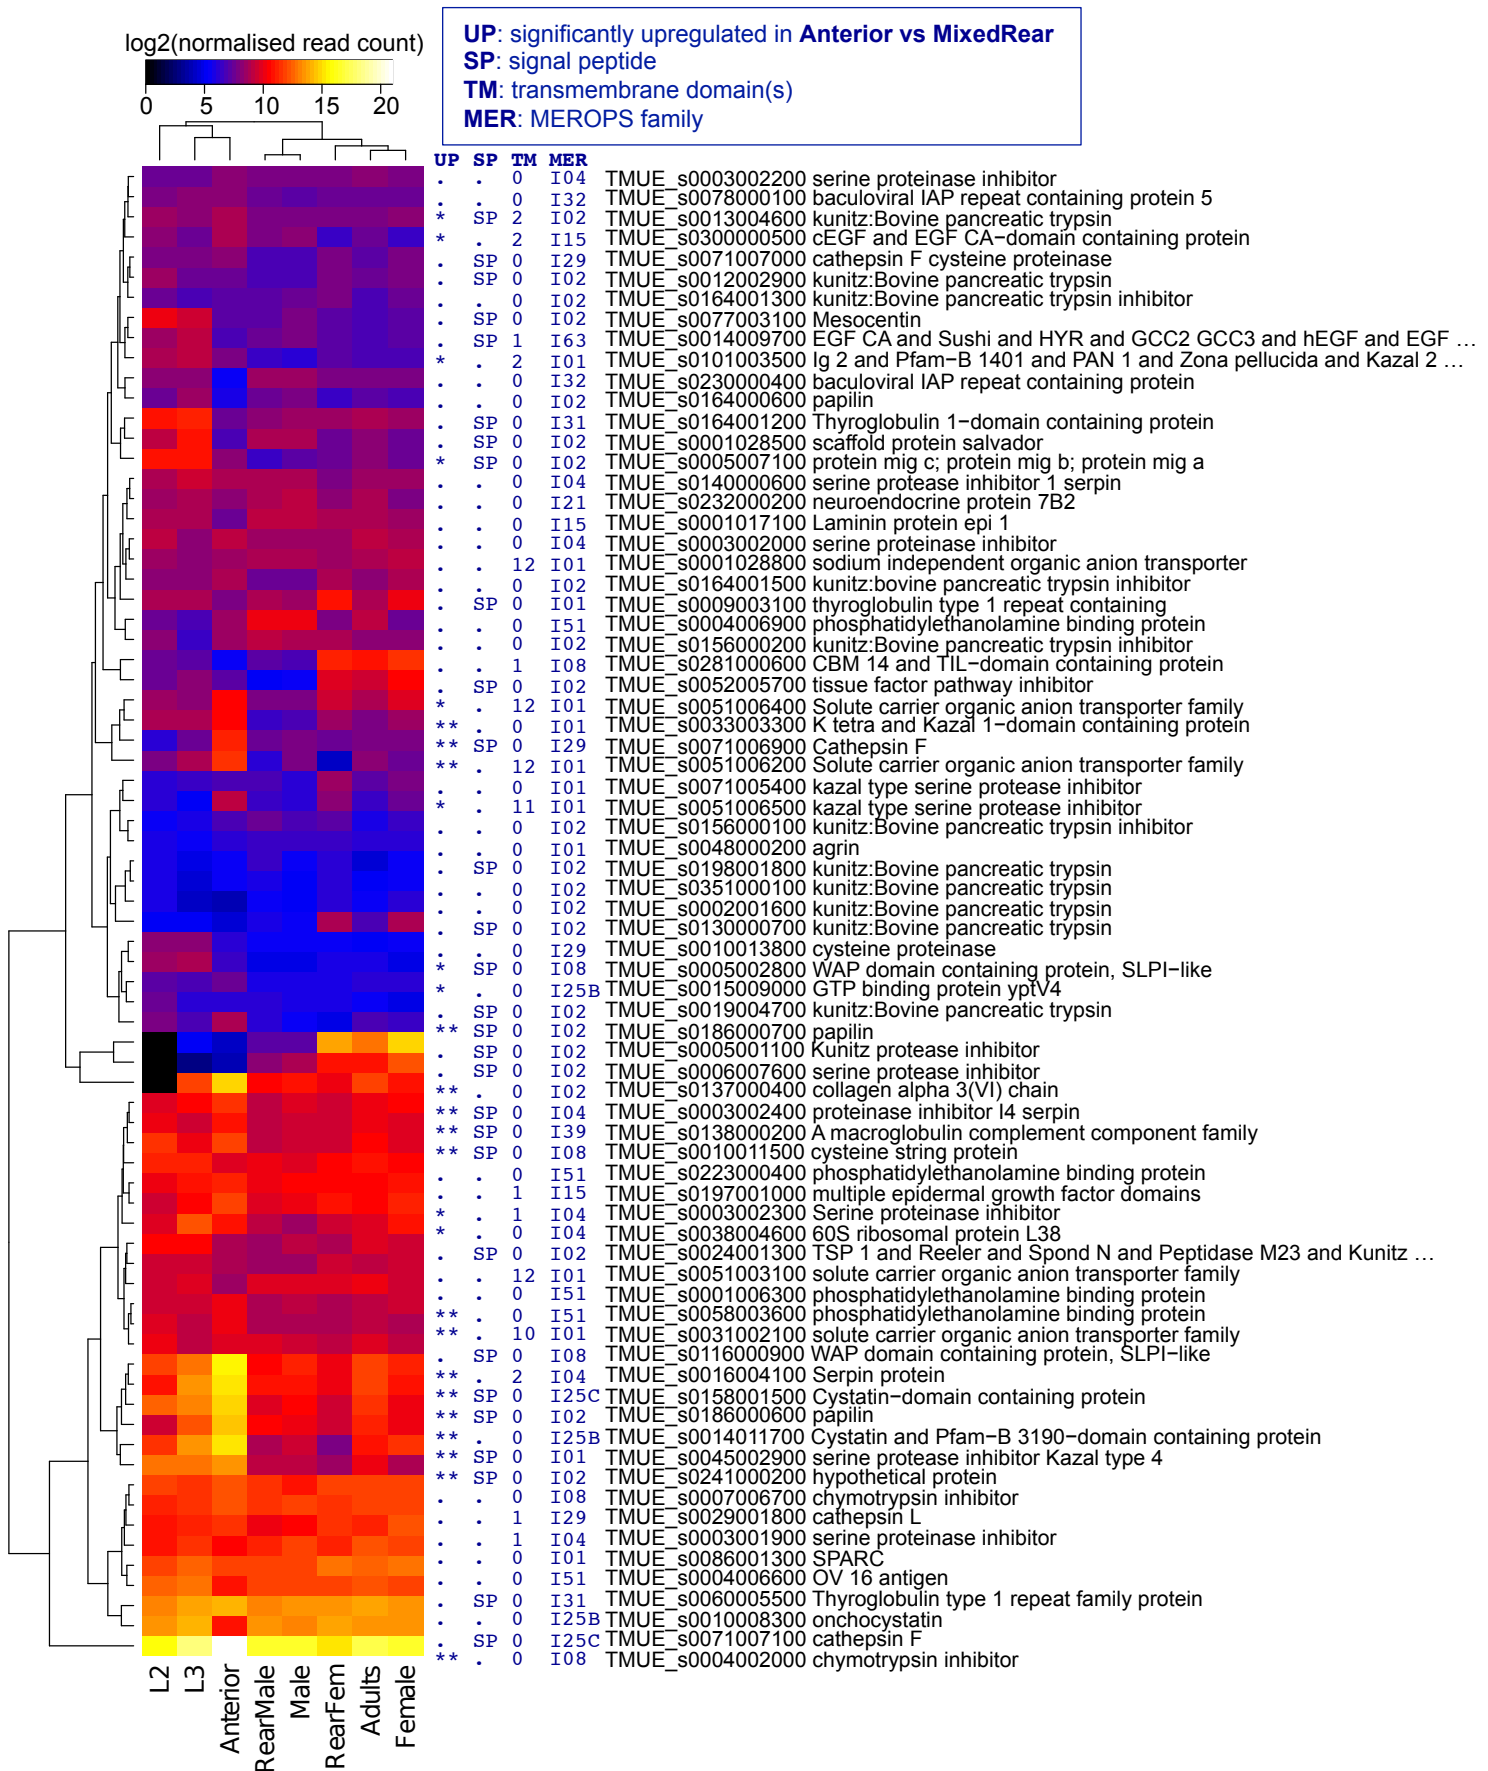

## Supplementary Figure 4g

**Major Sperm Protein domain (PF00635) containing proteins: with strongly upregulated expression in male whipworms and virtually no secreted proteins.**

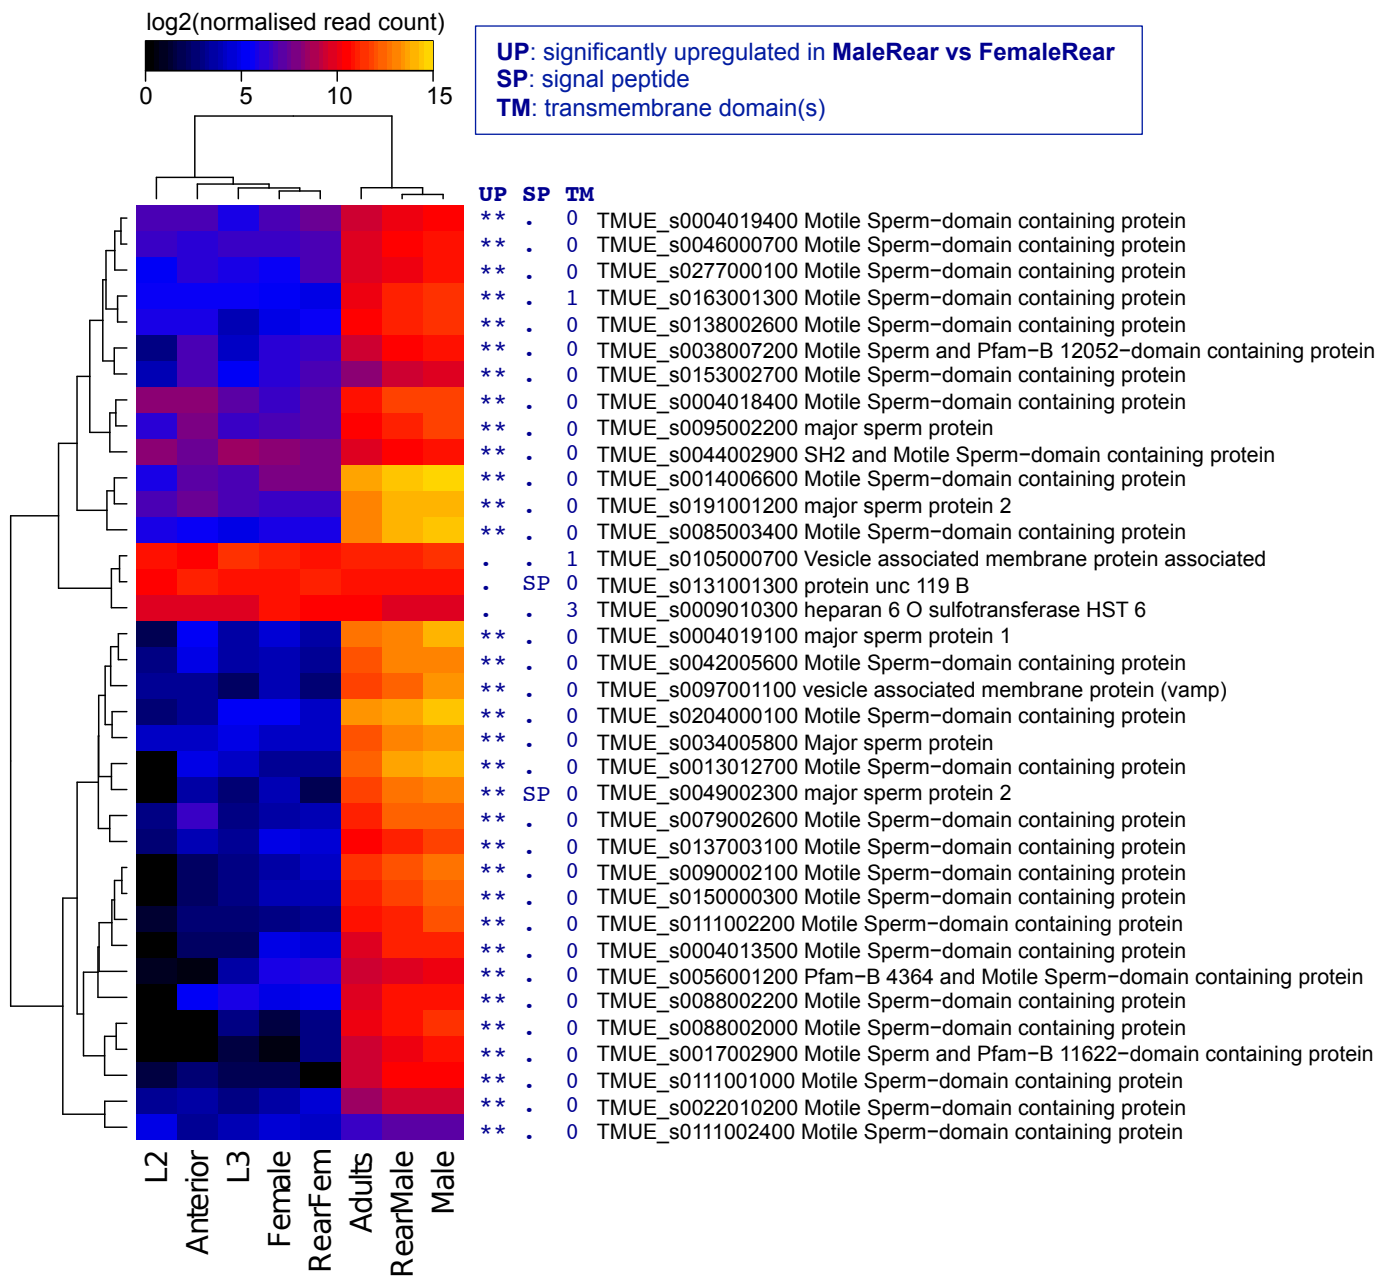

## Supplementary Figure 4h

Casein kinase-related (PTHR11909) proteins: with strongly upregulated expression in male whipworms and no secreted proteins.

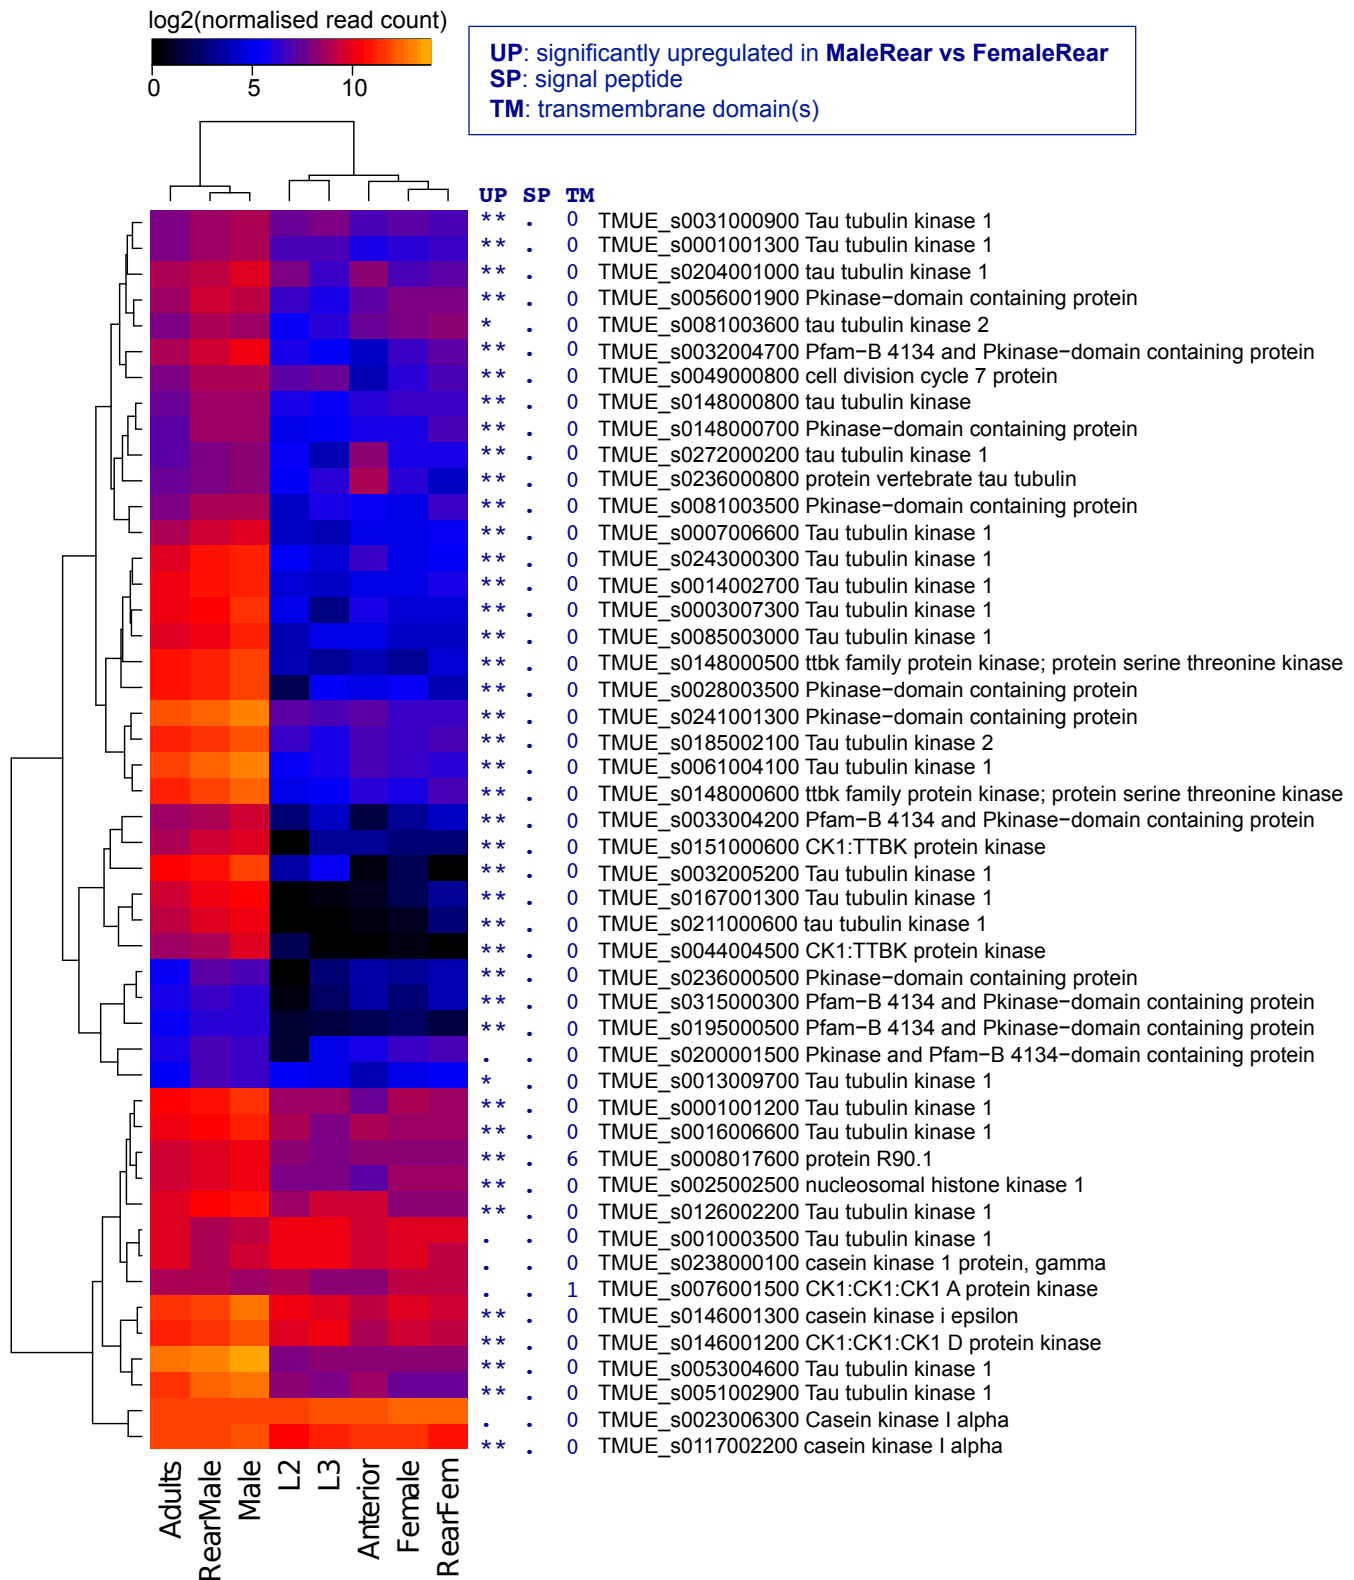

## Supplementary Figure 4i

**Epidermal Growth Factor-like domain (SM00181) containing proteins: tend to be upregulated in male whipworms and to contain 1-3 transmembrane domains.**

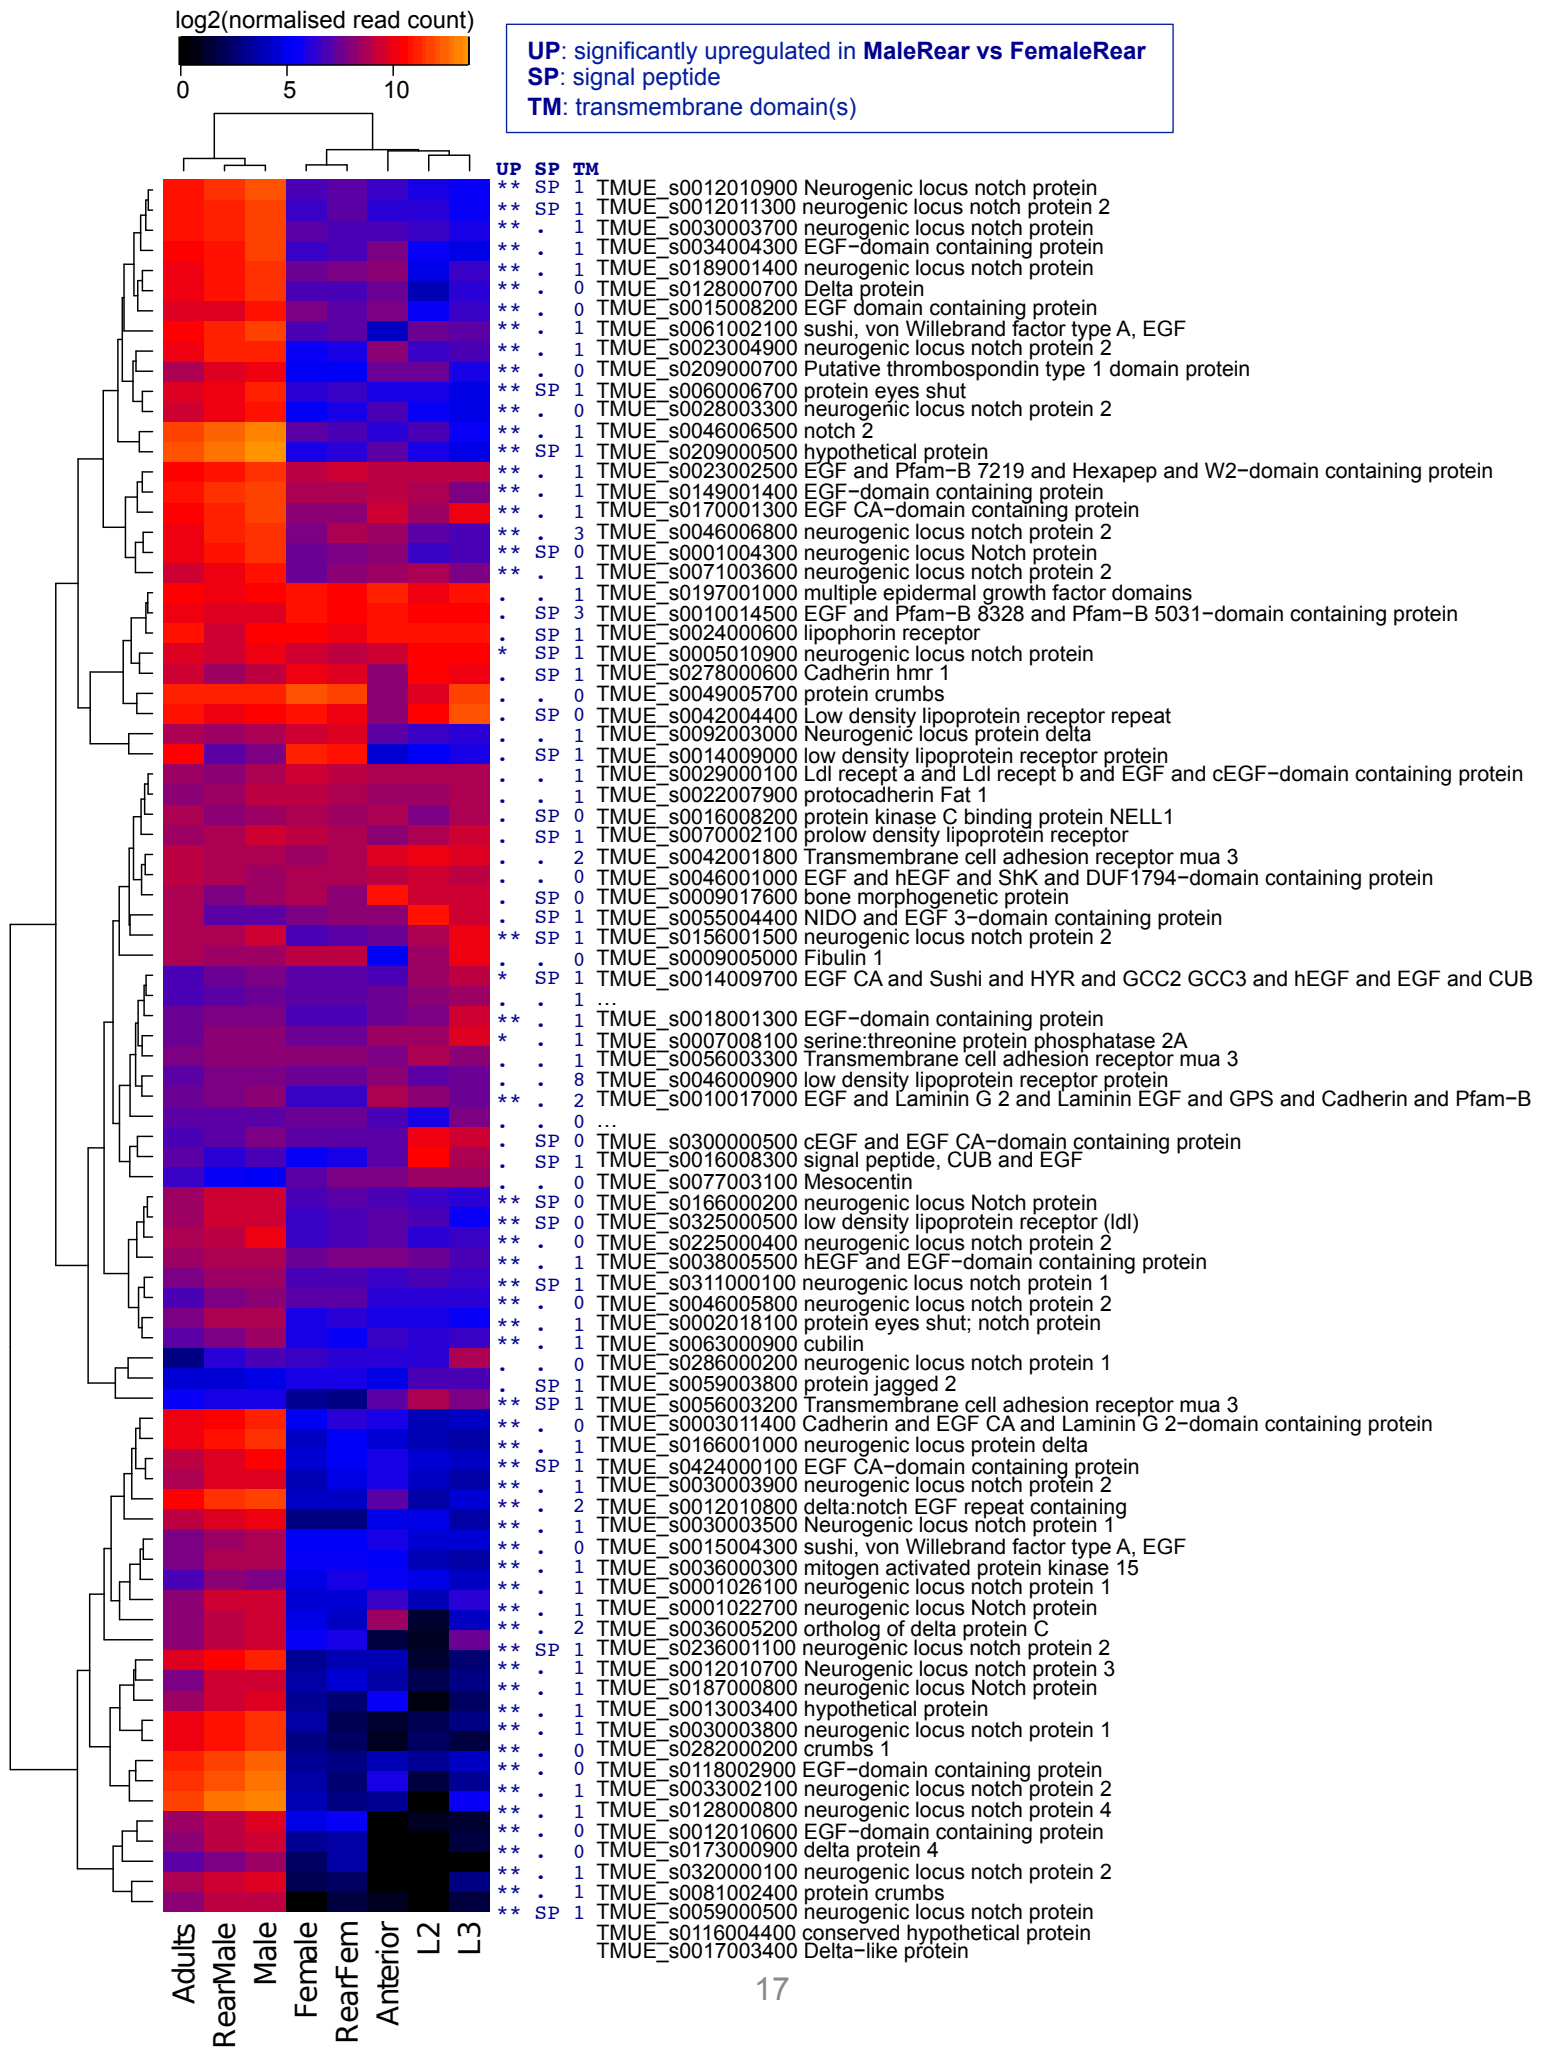



## Supplementary Figure 4j

**Chitin-binding domain (PF01607) containing proteins:** tend to be upregulated in female whipworms or the anterior region and to be secreted.

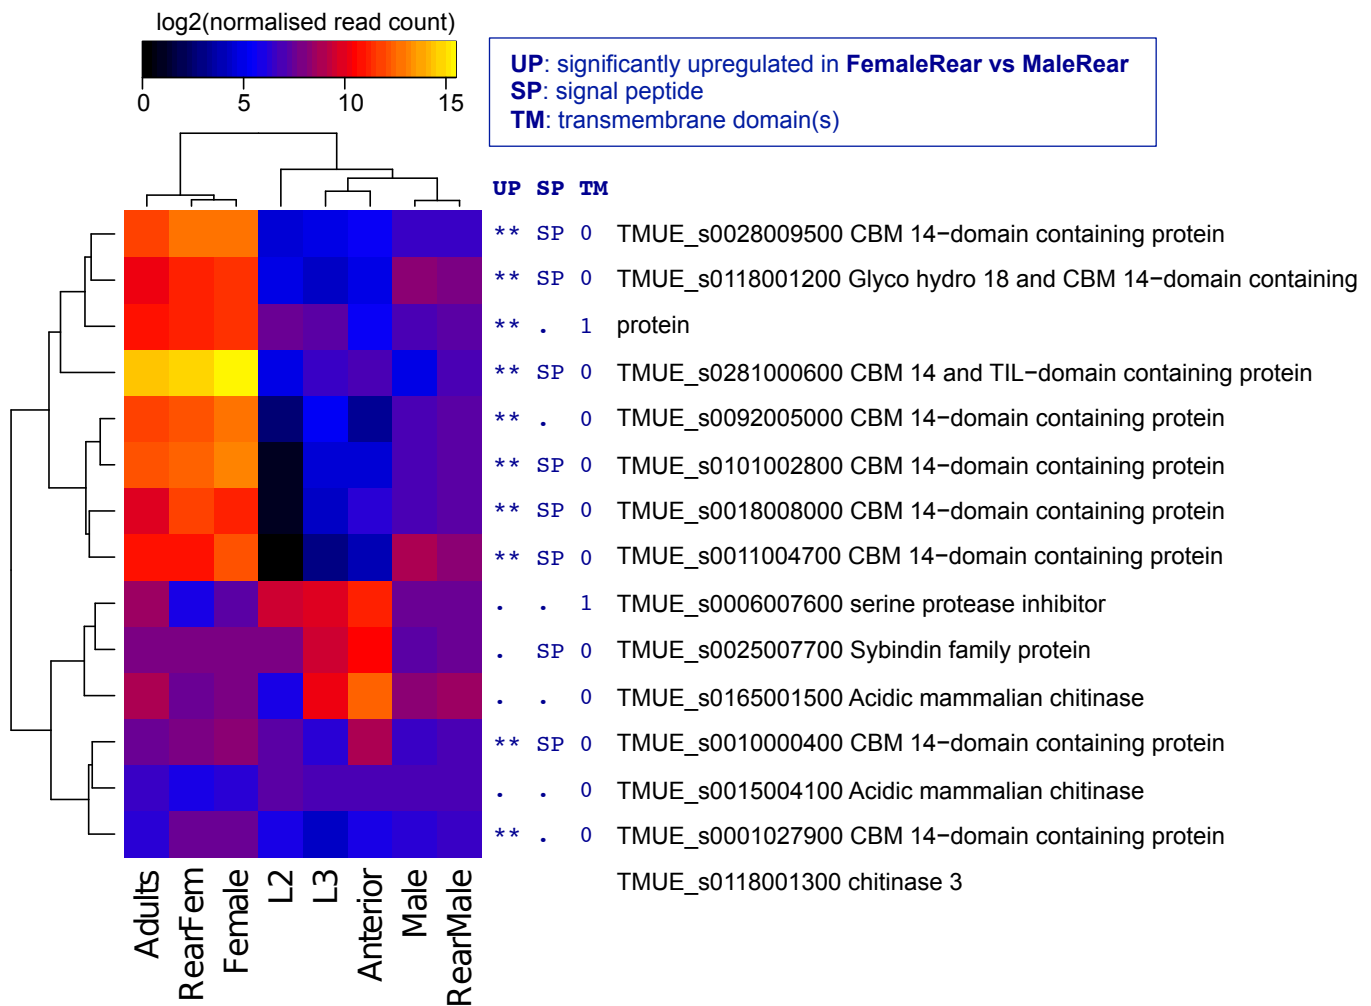

## Supplementary Figure 4k

**C4 zinc finger in nuclear hormone receptors (SM00399) domain containing proteins:** tend to be slightly but significantly upregulated in female whipworms, the anterior region or in larvae.

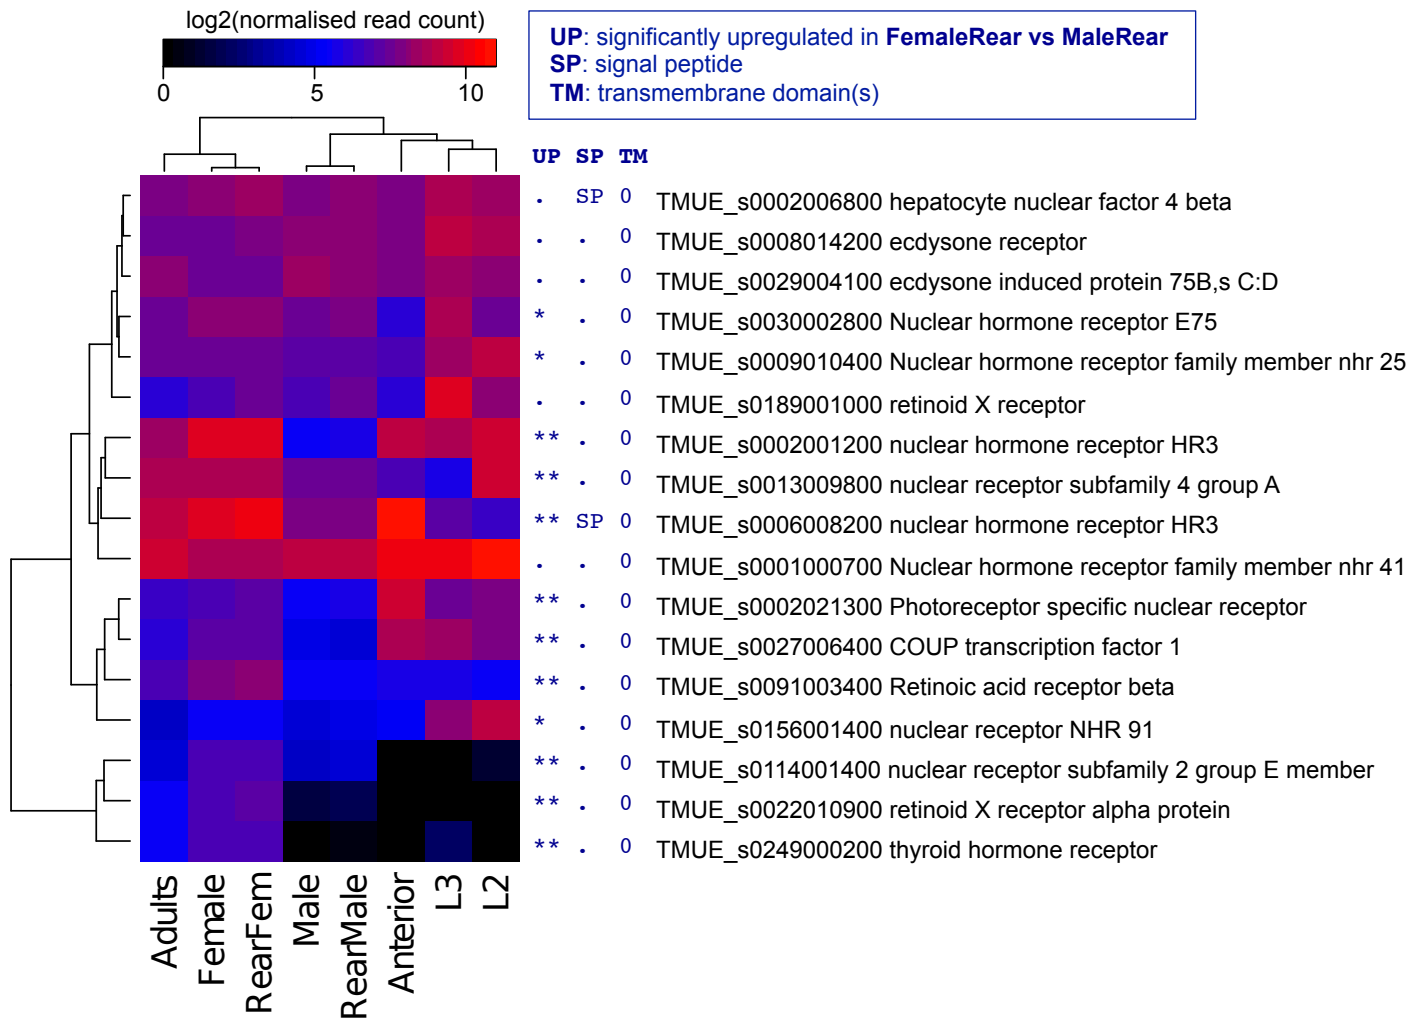

## Supplementary Figure 4I

**Nematode cuticle collagen N-terminal domain (PF01484) containing proteins: with strongly upregulated expression in larvae and typically one transmembrane domain.**

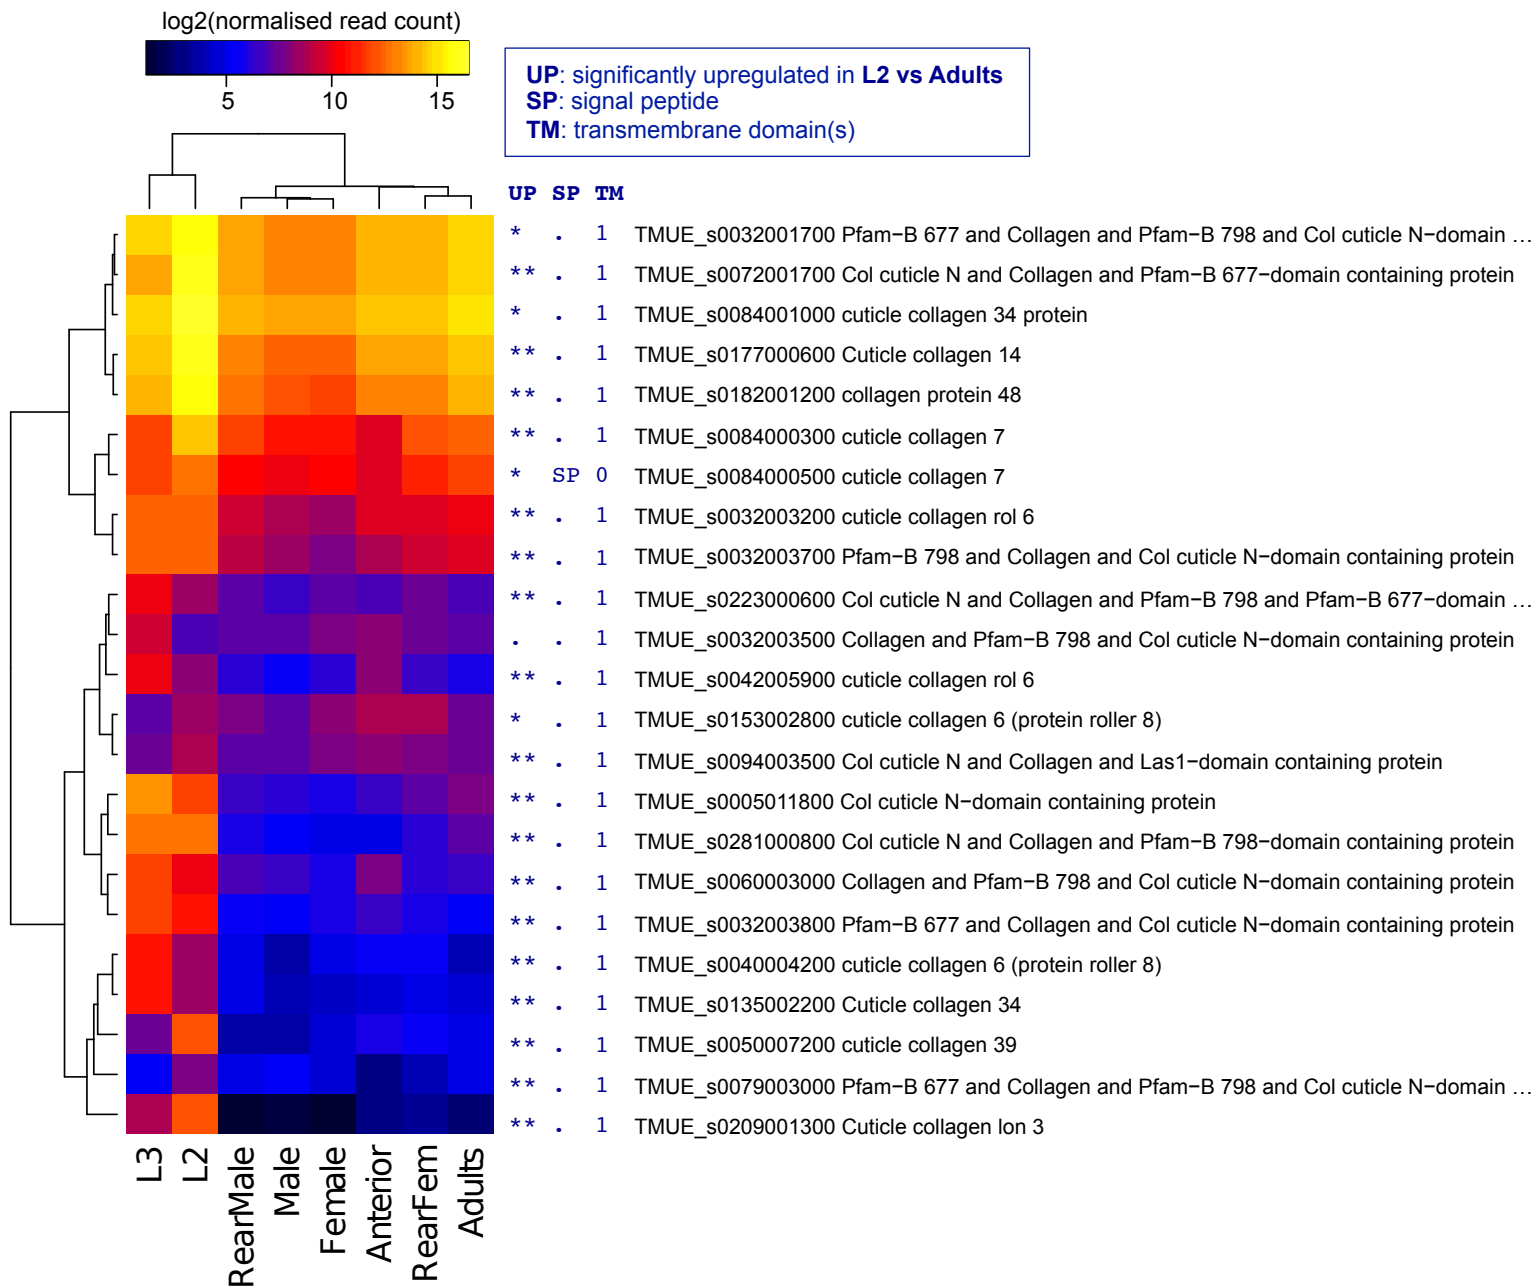



## Supplementary Figure 4m

Fibronectin type 3 (SM00060) domain containing proteins: tend to be upregulated in larvae.

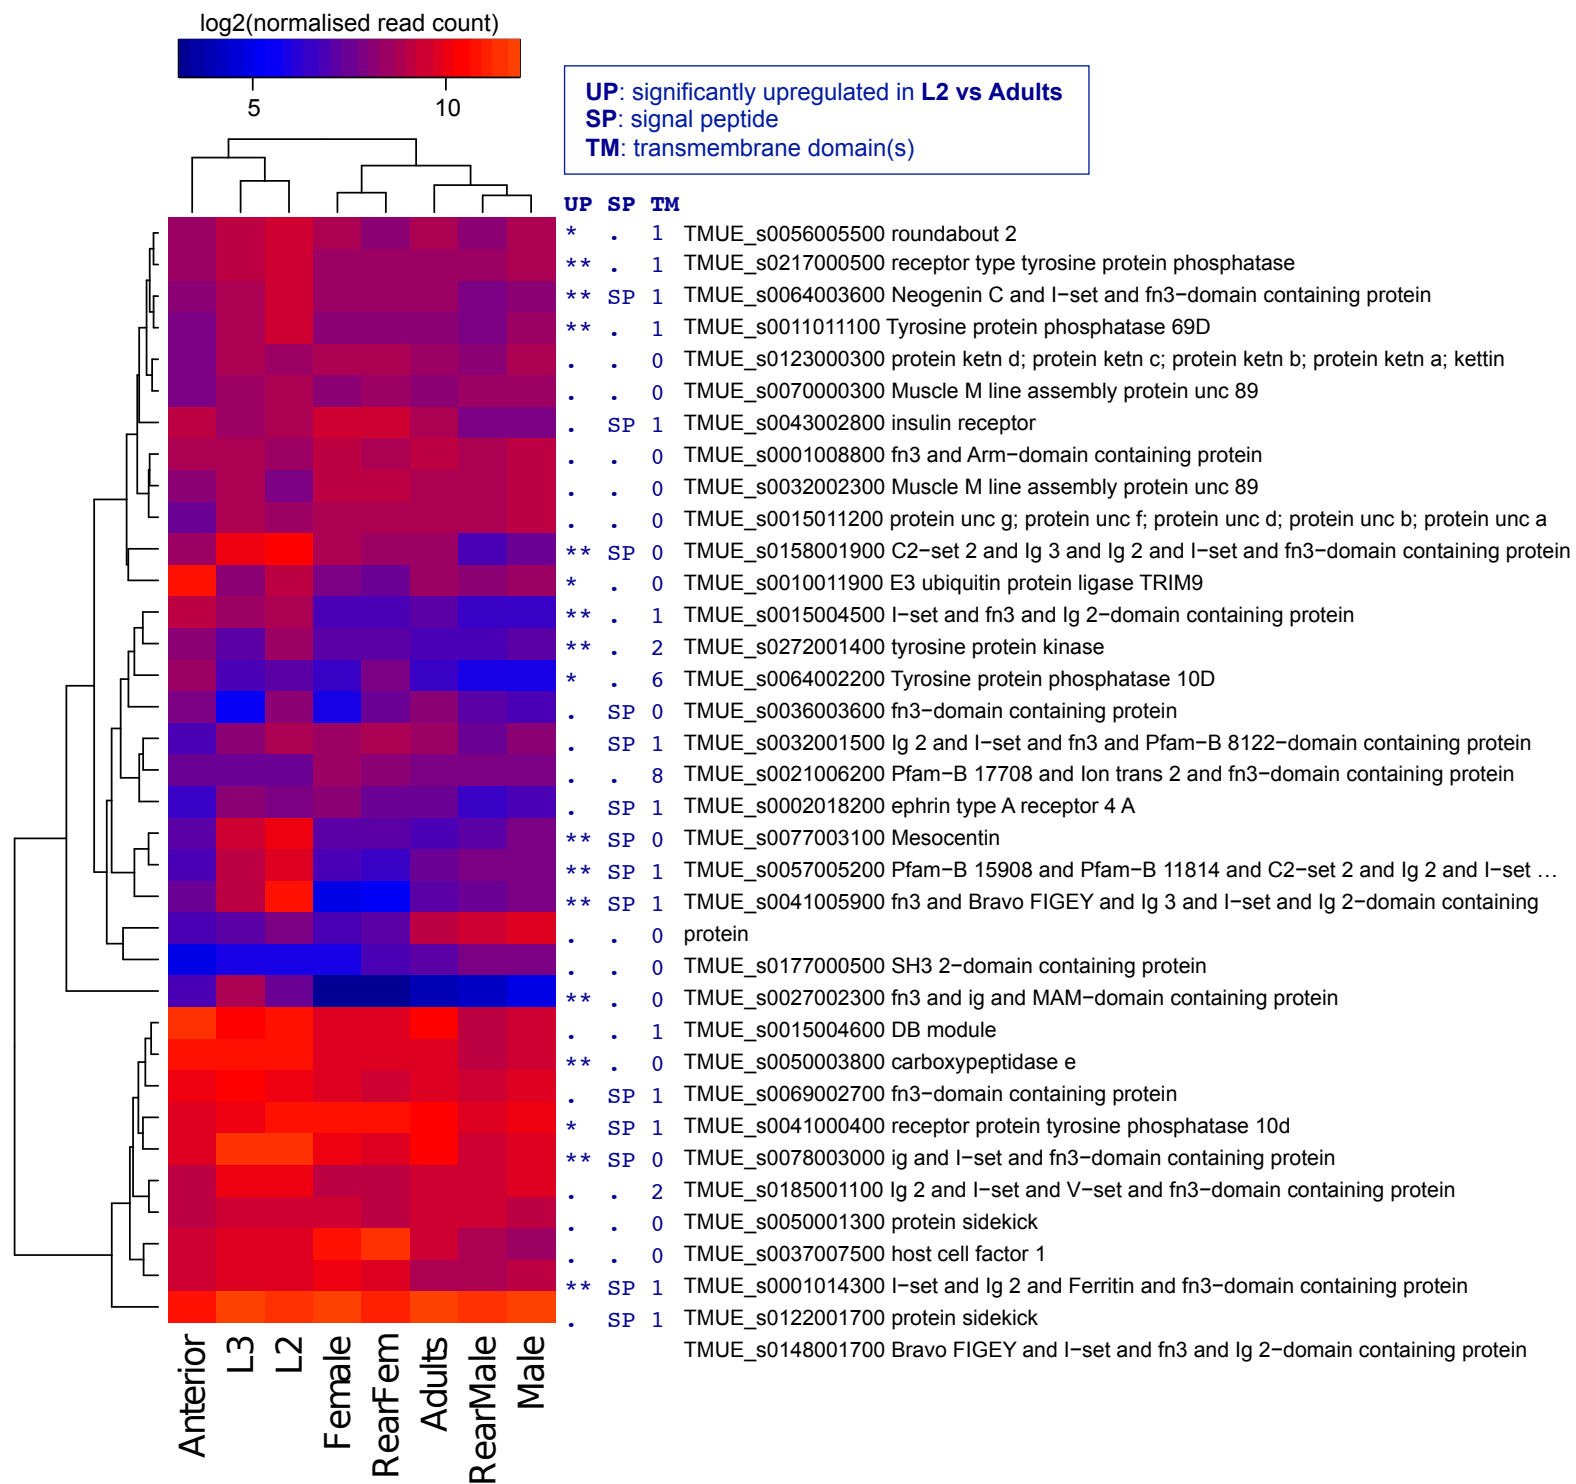

## Supplementary Figure 4n

**Glycolysis-related proteins** (representing a set of “housekeeping genes”): apart from a few apparently gender-specific isoforms of hexokinase, pyruvate kinase, and 6-phosphofructokinase, no strong group-wide differential expression pattern, and few secreted proteins.

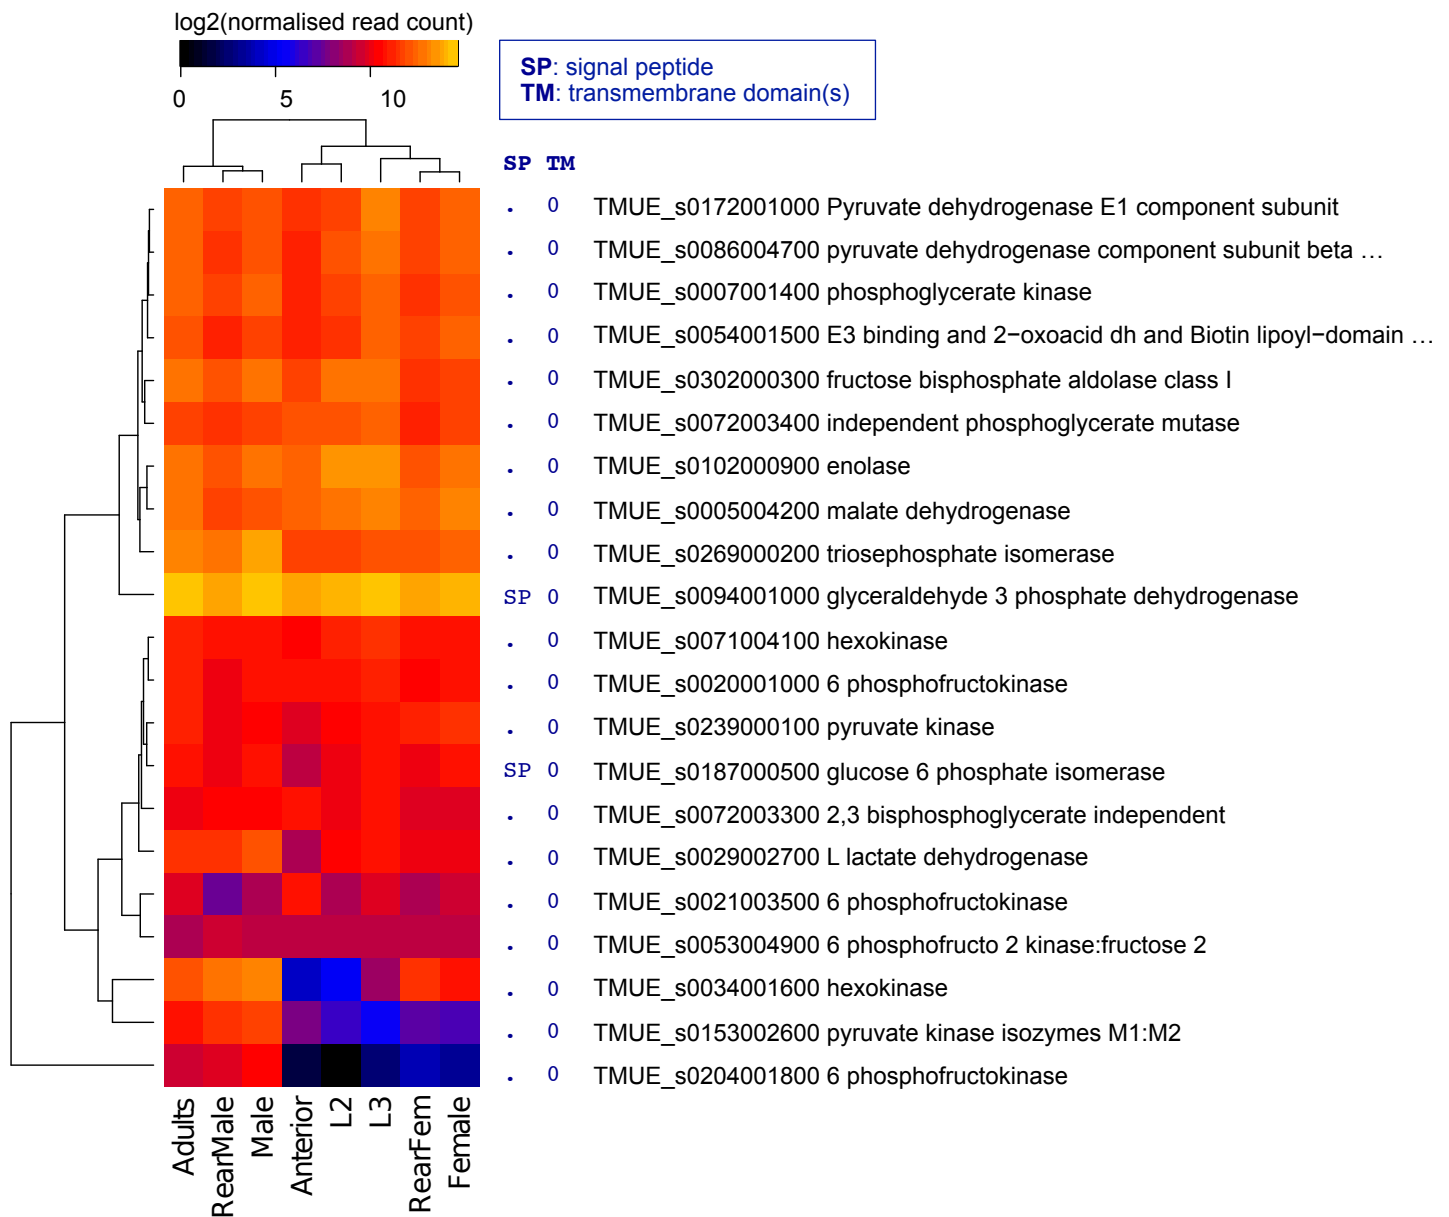

### Supplementary Figure 4o

The top 25 most abundant transcripts of each biological sample combined: secreted proteins and those of unknown function (“hypothetical protein”) are overrepresented among the transcriptionally most highly expressed genes of *T. muris*. Fractions of sequences with predicted SP: here 57.3% (43 of 75), proteome-wide 11.5% (1,265 of 11,004). Fractions of “hypothetical proteins”: here 52% (39 of 75), proteome-wide 34.9% (3,837 of 11,004).

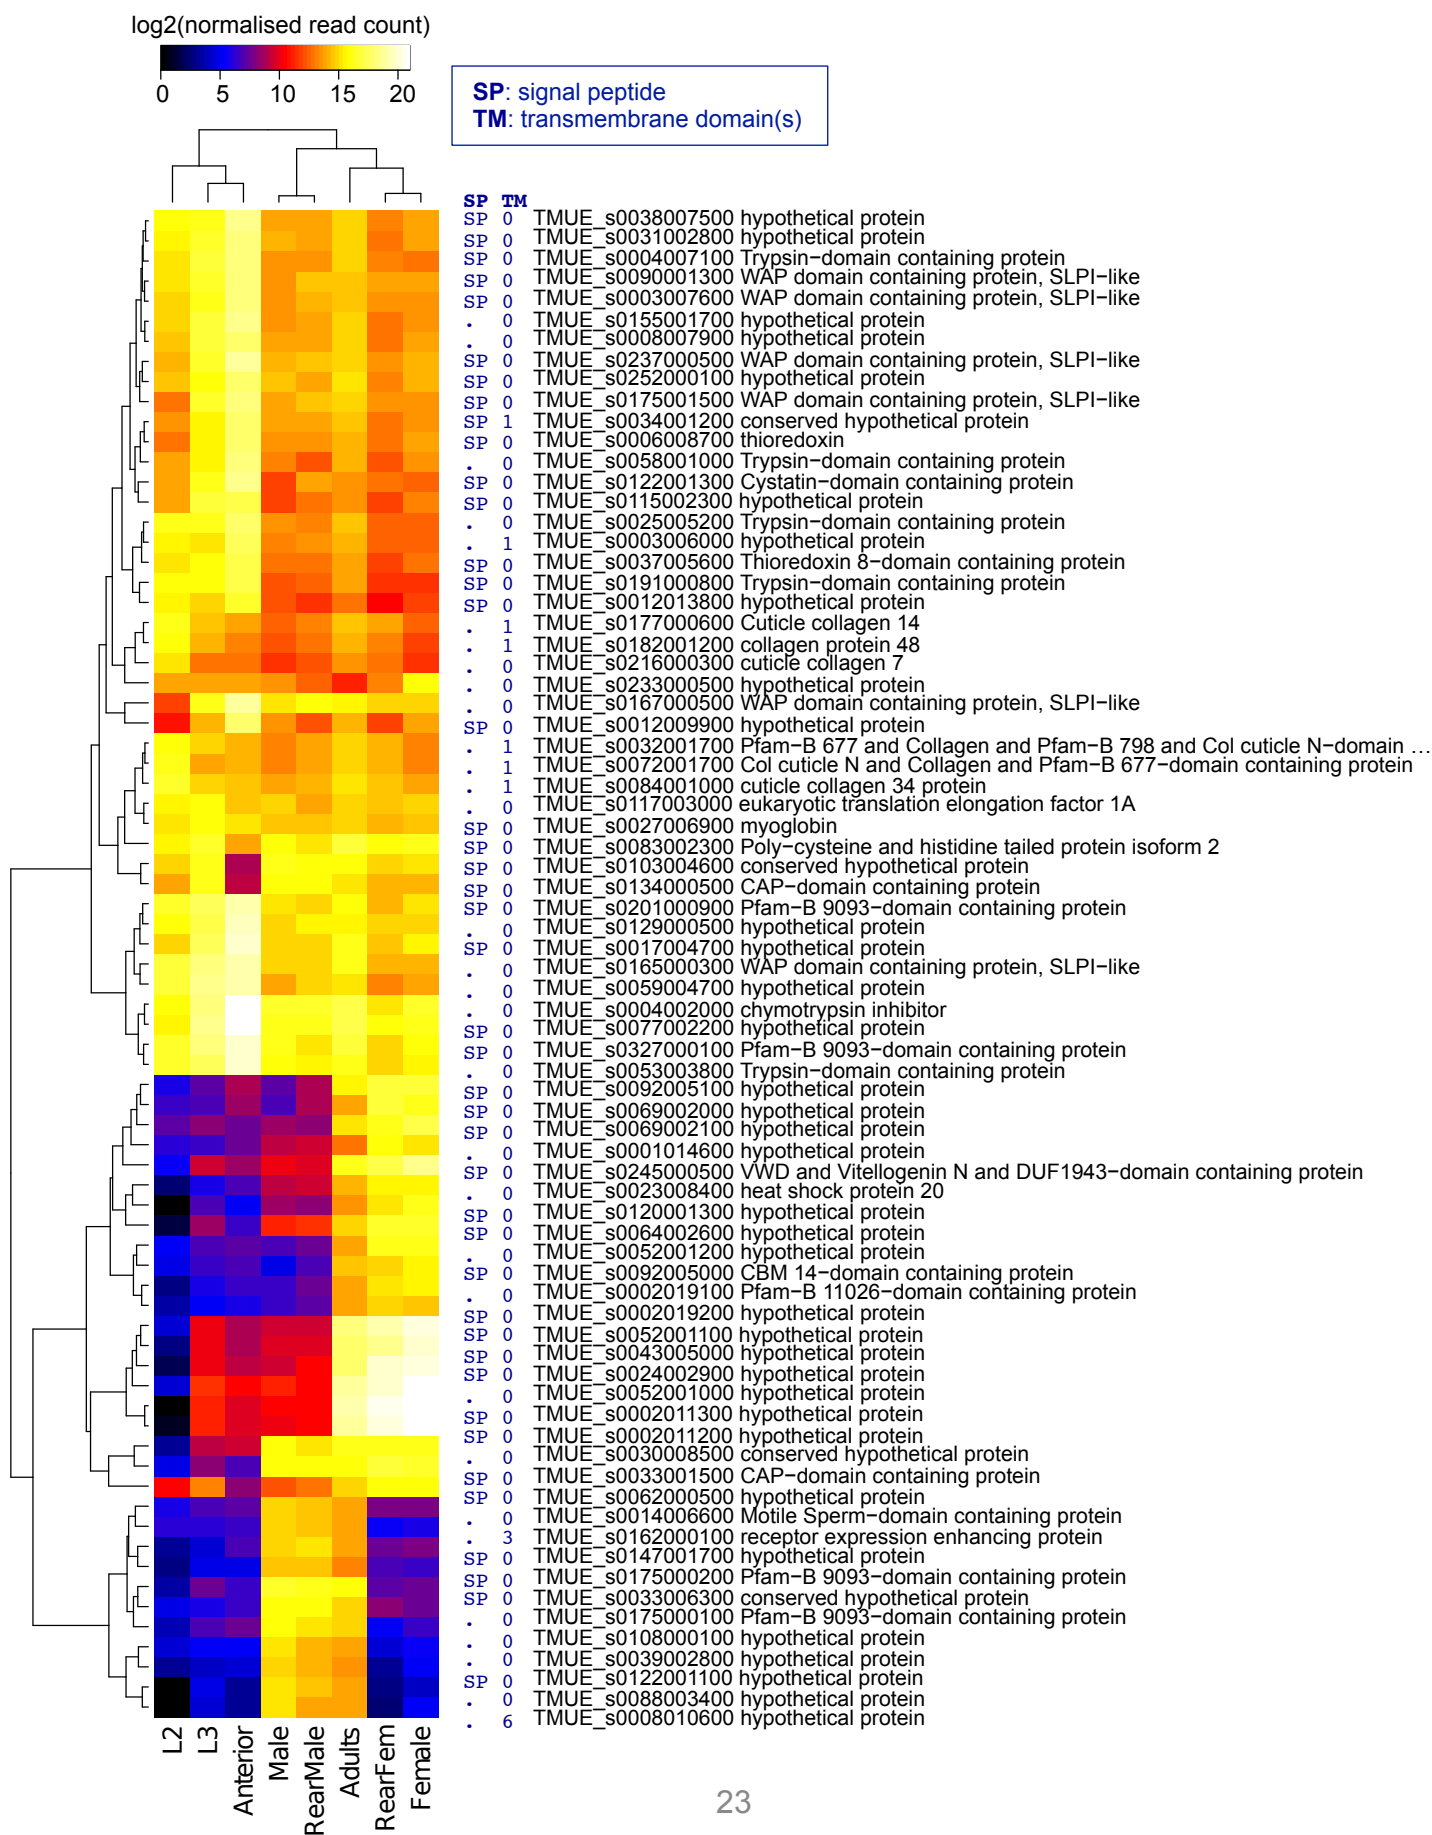

## Supplementary Figure 5

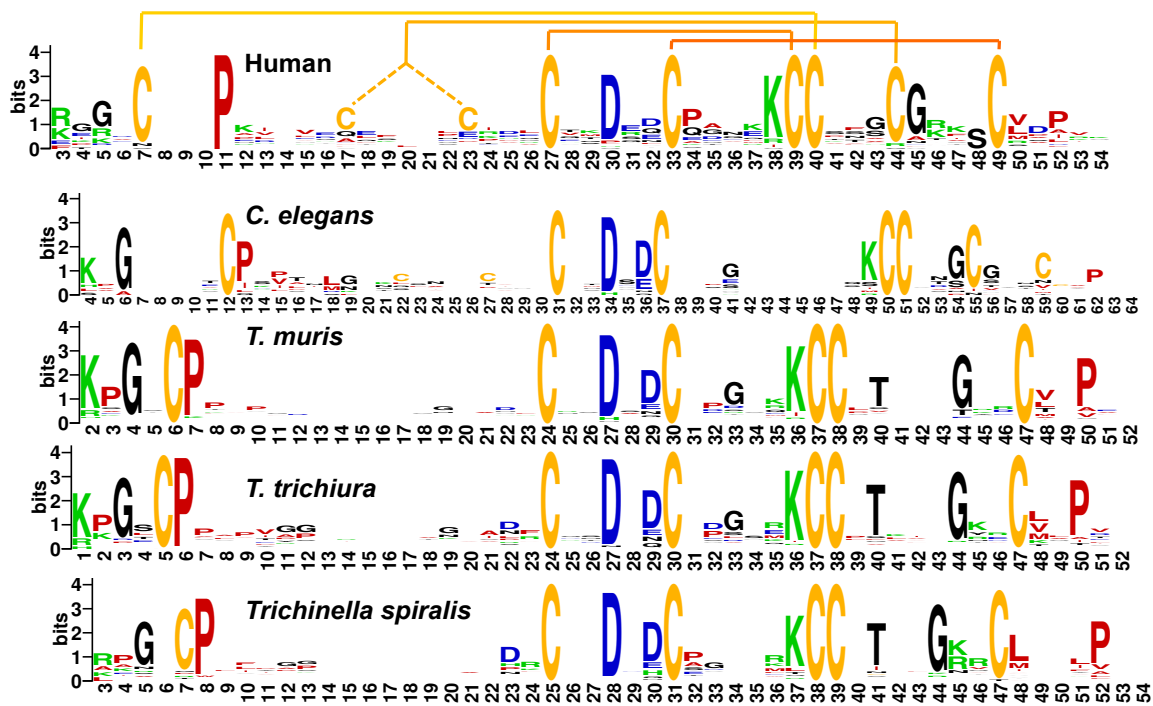

**Supplementary Figure 5 Sequence logos illustrating the conserved and distinct sequence characteristics of WAP domains (Interpro IPR008197) found in proteins of *H. sapiens*, *C. elegans*, *T. muris*, *T. trichiura*, and *Trichinella spiralis*. The canonical four disulfide bonds are highlighted in the sequence logo of the human WAP domains. The sequence logos representing the different species are aligned around the central CxxDxxC motif. This supplementary figure is a detailed version of Fig. 3b in the main text.**

# Supplementary Figure 6

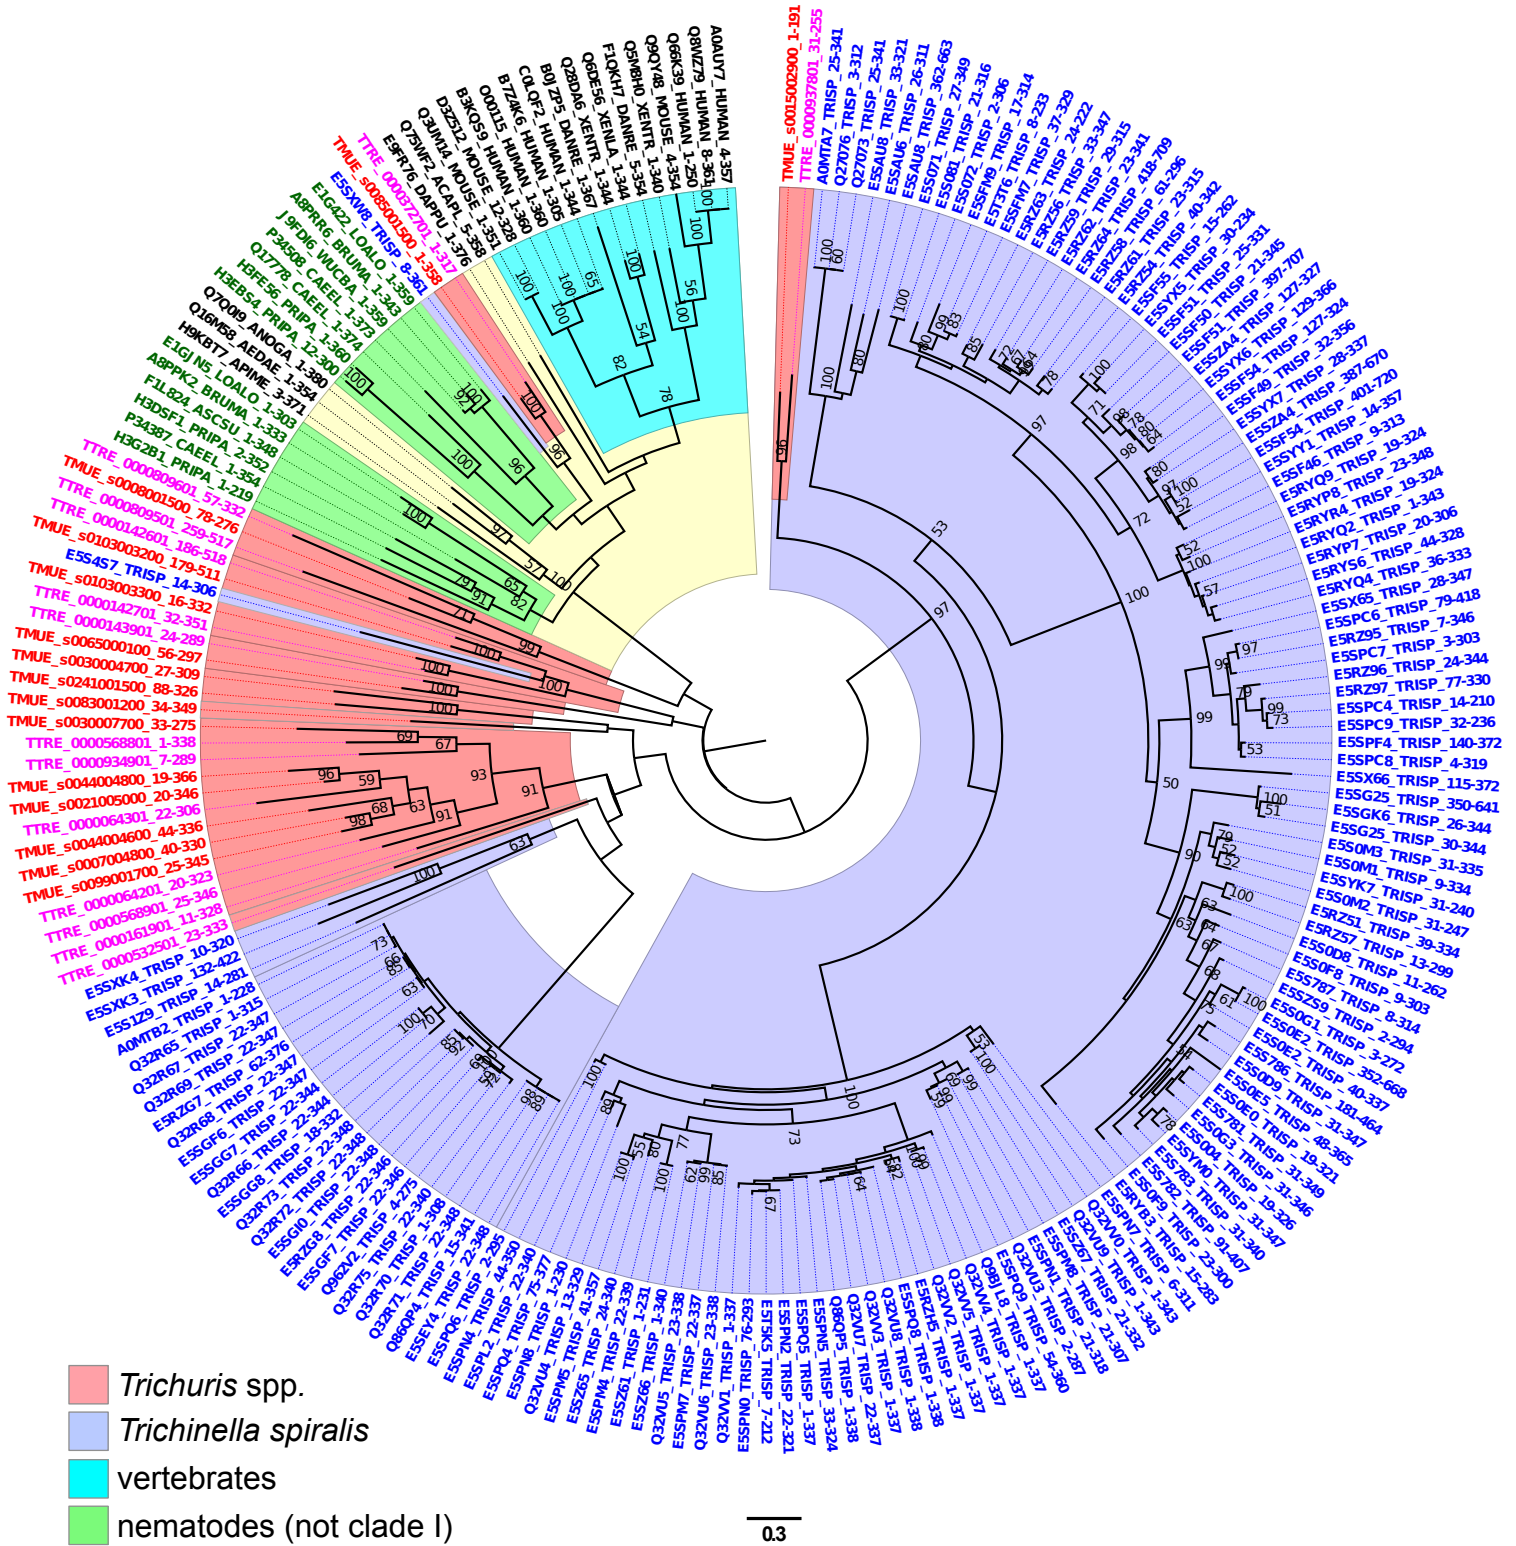

**Supplementary Figure 6 Phylogenetic analysis of DNase II-like proteins of *Trichuris* and *Trichinella*.** A maximum-likelihood phylogeny of DNase II protein domains (IPR004947) illustrates the relationships between DNase II domains of proteins from *Trichuris* spp, *Trichinella spiralis*, other nematodes, insects/other invertebrates, and vertebrates. The labels include UniProt accession numbers. This supplementary figure is a detailed version of Fig. 4b in the main text.



## Supplementary Figure 7

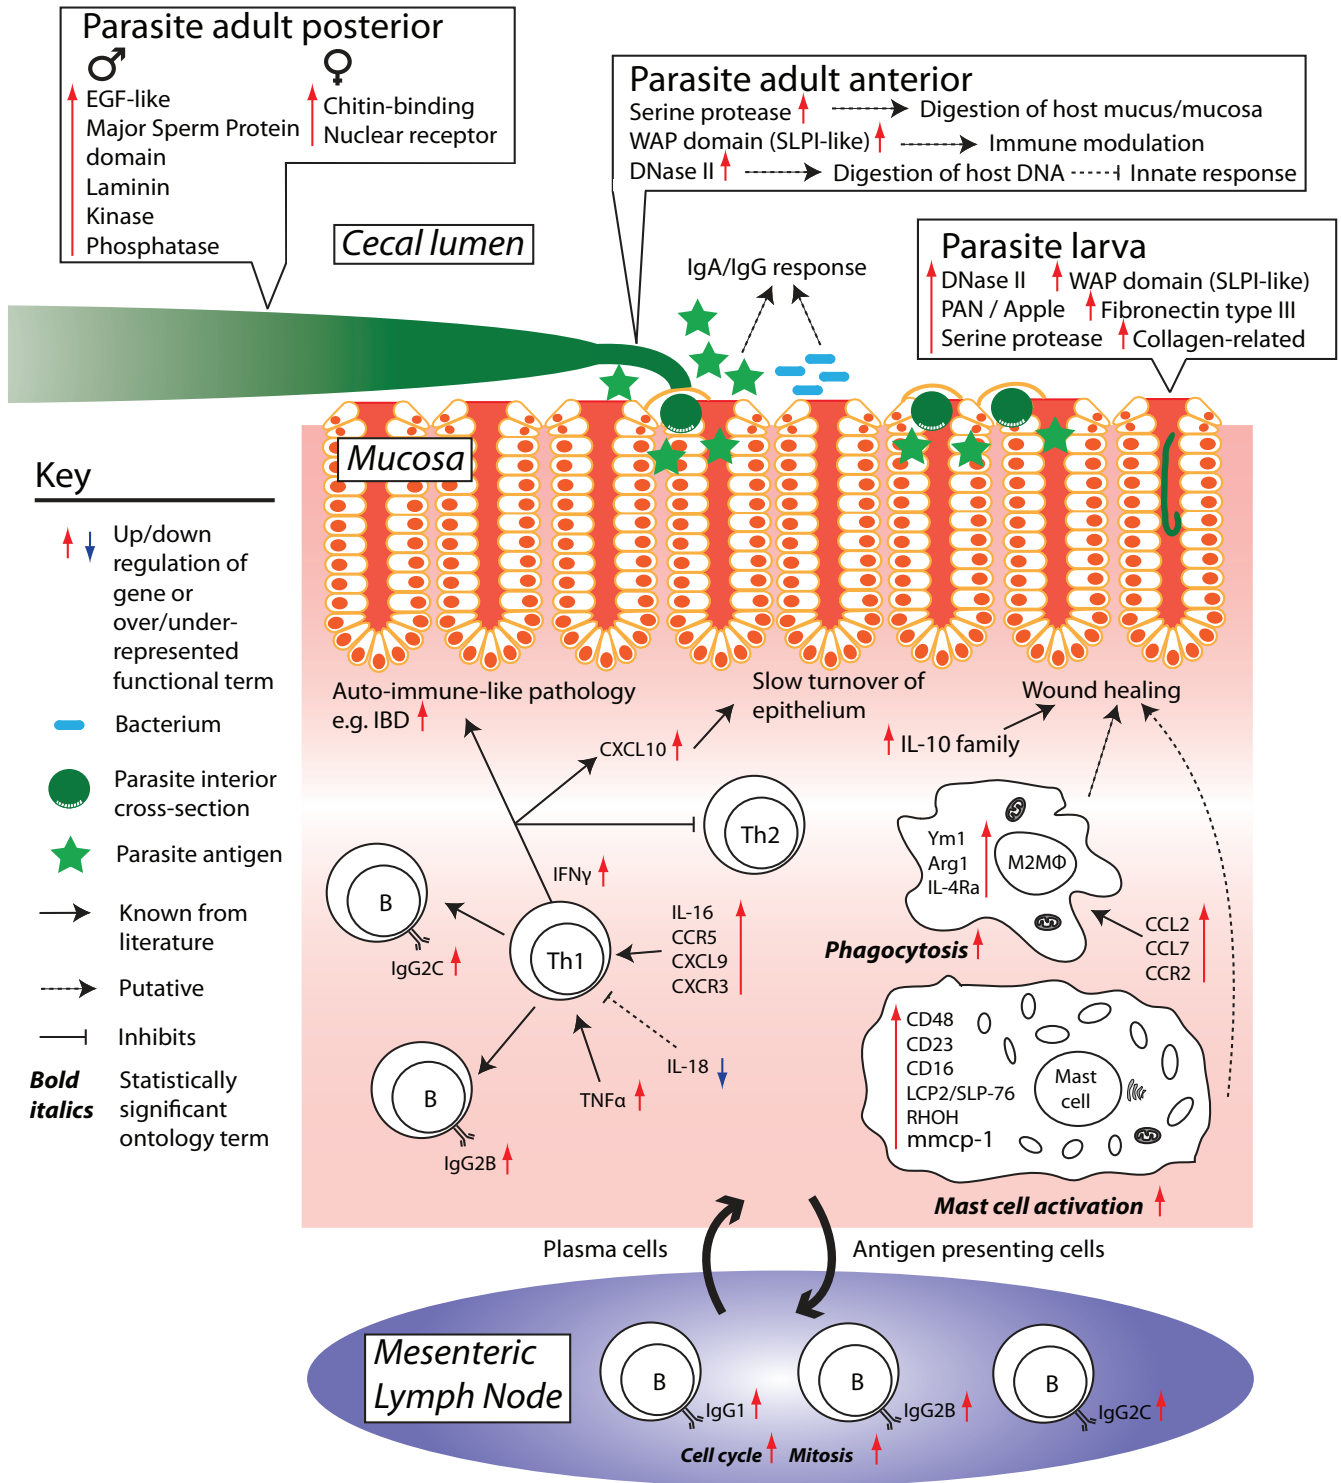

**Supplementary Figure 7 A summary of key gene expression changes in *Trichuris muris* and its host.** Groups of genes with common function that are significantly enriched amongst upregulated genes for different parasite tissues and life stages were identified (green). For some of these genes, putative roles in host parasite interactions in the adult anterior are proposed (dashed arrows). The transcriptomic response of the host cecum and mesenteric lymph node to *Trichuris* infection is summarized in terms of known (solid black arrows) and hypothesized (dashed black arrows) immunological interactions. Throughout, red/blue arrows indicate an upregulation/downregulation of a gene or enrichment/reduction of a functional category. Changes in transcript abundance were determined using EdgeR and DESeq with a false discovery rate (FDR) of 5%. Functional enrichment was determined by using TopGO with FDR 5% (mouse genes) and by performing a protein domain enrichment analysis with p-value <1% (whipworm genes).

## Supplementary Figure 8

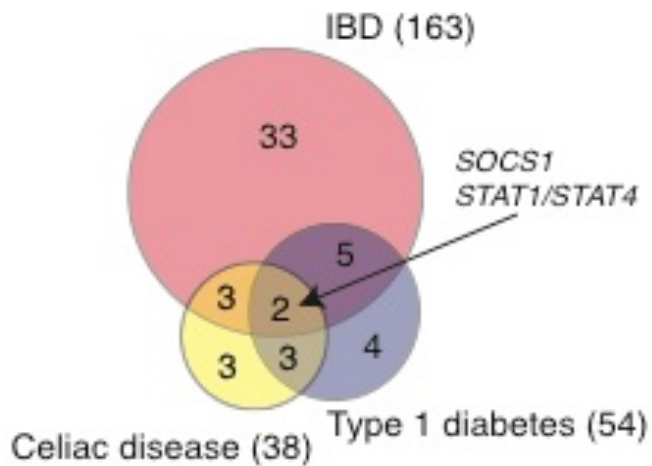

**Supplementary Figure 8 Overlap in genes involved in *Trichuris* infection and human auto-immune disease.** Numbers in brackets are genes identified as associated with the disease by GWAS. Circles represent number of genes that overlap those differentially expressed during *T. muris* infection.

## II. SUPPLEMENTARY TABLES

**Supplementary Table 2a: Statistically significant overrepresentation on linkage group X of genes with significantly higher (FDR 0.01) transcriptional expression in female *T. muris* parasites**

FDR limit for differentially expressed genes 0.01

Comparison: Female vs Male

LG = linkage group

### Contingency table

|                                  | <b>LG1</b> | <b>LG2</b> | <b>LGX</b> |
|----------------------------------|------------|------------|------------|
| genes NOTdifferentiallyExpressed | 1510       | 1370       | 781        |
| genes UPinFEMALE                 | 776        | 827        | <b>768</b> |
| genes UPinMALE                   | 1021       | 880        | 588        |

### Fisher Exact Test P-values

|                                          | <b>LG1 vs LG2</b> | <b>LG1 vs LGX</b>   | <b>LG2 vs LGX</b> |
|------------------------------------------|-------------------|---------------------|-------------------|
| NOTdifferentiallyExpressed vs UPinFEMALE | 0.0106            | <b>&lt; 2.2e-16</b> | <b>4.00E-13</b>   |
| NOTdifferentiallyExpressed vs UPinMALE   | 0.3908            | 0.1171              | <b>0.0233</b>     |



**Supplementary Table 2b: Genes present on the scaffolds inferred to represent the Y chromosome of *T. muris* parasites**

| Gene             | Length [bp] | Scaffold (genome v4) | Gene description               | Comment                                                                           |
|------------------|-------------|----------------------|--------------------------------|-----------------------------------------------------------------------------------|
| TMUE_s0013006600 | 267         | TMUE_000120          | hypothetical_protein           | In final gene set v2.3                                                            |
| TMUE_s0268001000 | 303         | TMUE_000341          | hypothetical_protein           | In final gene set v2.3                                                            |
| TMUE_s0379000200 | 219         | TMUE_000151          | hypothetical_protein           | In final gene set v2.3                                                            |
| TMUE_s0379000300 | 441         | TMUE_000151          | hypothetical_protein           | In final gene set v2.3                                                            |
| TMUE_s0410000200 | 327         | TMUE_000100          | hypothetical_protein           | In final gene set v2.3                                                            |
| TMUE_s0410000300 | 315         | TMUE_000100          | hypothetical_protein           | In final gene set v2.3                                                            |
| TMUE_s0487000100 | 342         | TMUE_000205          | hypothetical_protein           | In final gene set v2.3                                                            |
| TMUE_s0487000100 | 342         | TMUE_000466          | hypothetical_protein           | In final gene set v2.3                                                            |
| TMUE_s0547000200 | 246         | TMUE_000210          | hypothetical_protein           | In final gene set v2.3                                                            |
| TMUE_s0547000200 | 246         | TMUE_000363          | hypothetical_protein           | In final gene set v2.3                                                            |
| TMUE_s0624000100 | 417         | TMUE_000294          | hypothetical_protein           | In final gene set v2.3                                                            |
| TMUE_s0634000100 | 119         | TMUE_000446          | hypothetical_protein           | In final gene set v2.3                                                            |
| TMUE_s0634000200 | 516         | TMUE_000446          | hypothetical_protein           | In final gene set v2.3                                                            |
| TMUE_s0720000100 | 327         | TMUE_000161          | hypothetical_protein           | In final gene set v2.3                                                            |
| TMUE_s0758000200 | 444         | TMUE_000511          | hypothetical_protein           | In final gene set v2.3                                                            |
| TMUE_s0846000100 | 303         | TMUE_000533          | hypothetical_protein           | In final gene set v2.3                                                            |
| TMUE_s0866000100 | 333         | TMUE_000350          | hypothetical_protein           | In final gene set v2.3                                                            |
| TMUE_s0896000100 | 264         | TMUE_000894          | hypothetical_protein           | In final gene set v2.3                                                            |
| TMUE_s0915000200 | 516         | TMUE_000263          | hypothetical_protein           | In final gene set v2.3                                                            |
| TMUE_s0928000100 | 327         | TMUE_000422          | hypothetical_protein           | In final gene set v2.3                                                            |
| TMUE_s1010000200 | 546         | TMUE_000100          | hypothetical_protein           | In final gene set v2.3                                                            |
| TMUE_s1019000100 | 321         | TMUE_000238          | hypothetical_protein           | In final gene set v2.3                                                            |
| TMUE_s1070000100 | 567         | TMUE_000259          | hypothetical_protein           | In final gene set v2.3                                                            |
| TMUE_s1091000100 | 483         | TMUE_000511          | hypothetical_protein           | In final gene set v2.3                                                            |
| TMUE_s1096000100 | 300         | TMUE_000158          | hypothetical_protein           | In final gene set v2.3                                                            |
| TMUE_s1122000100 | 207         | TMUE_000394          | hypothetical_protein           | In final gene set v2.3                                                            |
| TMUE_s1143000100 | 438         | TMUE_000401          | hypothetical_protein           | In final gene set v2.3                                                            |
| TMUE_s1153000100 | 291         | TMUE_000558          | hypothetical_protein           | In final gene set v2.3                                                            |
| TMUE_s1216000100 | 177         | TMUE_000422          | hypothetical_protein           | In final gene set v2.3                                                            |
| TMUE_s1225000100 | 438         | TMUE_000205          | hypothetical_protein           | In final gene set v2.3                                                            |
| TMUE_s1268000100 | 420         | TMUE_000726          | hypothetical_protein           | In final gene set v2.3                                                            |
| TMUE_s1327000100 | 342         | TMUE_000899          | hypothetical_protein           | In final gene set v2.3                                                            |
| TMUE_s1095000200 | 807         | TMUE_000120          | hypothetical_protein           | In gene set v2.2, but removed from final gene set v2.3 because transposon-related |
| TMUE_s0303000700 | 621         | TMUE_000146          | conserved_hypothetical_protein | In final gene set v2.3                                                            |
| TMUE_s0346000200 | 735         | TMUE_000492          | conserved_hypothetical_protein | In final gene set v2.3                                                            |
| TMUE_s0411000100 | 471         | TMUE_000208          | conserved_hypothetical_protein | In final gene set v2.3                                                            |
| TMUE_s0470000100 | 447         | TMUE_000275          | conserved_hypothetical_protein | In final gene set v2.3                                                            |
| TMUE_s0508000200 | 300         | TMUE_000391          | conserved_hypothetical_protein | In final gene set v2.3                                                            |
| TMUE_s0634000300 | 735         | TMUE_000446          | conserved_hypothetical_protein | In final gene set v2.3                                                            |
| TMUE_s0722000100 | 234         | TMUE_000180          | conserved_hypothetical_protein | In final gene set v2.3                                                            |
| TMUE_s0803000100 | 657         | TMUE_000150          | conserved_hypothetical_protein | In final gene set v2.3                                                            |
| TMUE_s0920000100 | 825         | TMUE_000187          | conserved_hypothetical_protein | In final gene set v2.3                                                            |
| TMUE_s1097000100 | 1317        | TMUE_000681          | conserved_hypothetical_protein | In final gene set v2.3                                                            |
| TMUE_s1141000100 | 1194        | TMUE_000459          | conserved_hypothetical_protein | In final gene set v2.3                                                            |
| TMUE_s1151000100 | 498         | TMUE_000240          | conserved_hypothetical_protein | In final gene set v2.3                                                            |

|                  |      |             |                                                           |                                                                                   |
|------------------|------|-------------|-----------------------------------------------------------|-----------------------------------------------------------------------------------|
| TMUE_s1174000100 | 735  | TMUE_000670 | conserved_hypothetical_protein                            | In final gene set v2.3                                                            |
| TMUE_s1192000100 | 996  | TMUE_000256 | conserved_hypothetical_protein                            | In final gene set v2.3                                                            |
| TMUE_s1310000100 | 1308 | TMUE_000333 | conserved_hypothetical_protein                            | In final gene set v2.3                                                            |
| TMUE_s0323000300 | 1020 | TMUE_000100 | conserved_hypothetical_protein                            | In gene set v2.2, but removed from final gene set v2.3 because transposon-related |
| TMUE_s1320000100 | 1356 | TMUE_000485 | conserved_hypothetical_protein                            | In gene set v2.2, but removed from final gene set v2.3 because transposon-related |
| TMUE_s0044000200 | 2709 | TMUE_000310 | DUF1759-domain_containing_protein                         | In gene set v2.2, but removed from final gene set v2.3 because transposon-related |
| TMUE_s0372000100 | 1427 | TMUE_000277 | DUF1759-domain_containing_protein                         | In gene set v2.2, but removed from final gene set v2.3 because transposon-related |
| TMUE_s1077000100 | 369  | TMUE_000342 | DUF1759-domain_containing_protein                         | In gene set v2.2, but removed from final gene set v2.3 because transposon-related |
| TMUE_s0466000100 | 2232 | TMUE_000302 | gag_pol_polyprotein                                       | In gene set v2.2, but removed from final gene set v2.3 because transposon-related |
| TMUE_s1053000100 | 483  | TMUE_000146 | gag_pol_polyprotein                                       | In gene set v2.2, but removed from final gene set v2.3 because transposon-related |
| TMUE_s0803000200 | 525  | TMUE_000150 | Pao_retrotransposon_peptidase_family_protein              | In gene set v2.2, but removed from final gene set v2.3 because transposon-related |
| TMUE_s1192000200 | 525  | TMUE_000256 | Pao_retrotransposon_peptidase_family_protein              | In gene set v2.2, but removed from final gene set v2.3 because transposon-related |
| TMUE_s0375000100 | 2805 | TMUE_000120 | Peptidase_A17-domain_containing_protein                   | In gene set v2.2, but removed from final gene set v2.3 because transposon-related |
| TMUE_s0875000100 | 2052 | TMUE_000323 | Peptidase_A17-domain_containing_protein                   | In gene set v2.2, but removed from final gene set v2.3 because transposon-related |
| TMUE_s1148000100 | 1590 | TMUE_000505 | Peptidase_A17-domain_containing_protein                   | In gene set v2.2, but removed from final gene set v2.3 because transposon-related |
| TMUE_s0228000100 | 1047 | TMUE_000169 | Pfam-B_2707_and_RVT_1-domain_containing_protein           | In gene set v2.2, but removed from final gene set v2.3 because transposon-related |
| TMUE_s0228000200 | 690  | TMUE_000169 | Pfam-B_310-domain_containing_protein                      | In final gene set v2.3                                                            |
| TMUE_s0228000300 | 438  | TMUE_000169 | pol_polyprotein                                           | In gene set v2.2, but removed from final gene set v2.3 because transposon-related |
| TMUE_s0303000800 | 3873 | TMUE_000146 | polyprotein                                               | In final gene set v2.3                                                            |
| TMUE_s0642000100 | 1476 | TMUE_000494 | rve-domain_containing_protein                             | In gene set v2.2, but removed from final gene set v2.3 because transposon-related |
| TMUE_s0444000100 | 3780 | TMUE_000251 | RVT_1_and_Peptidase_A17_and_rve-domain_containing_protein | In gene set v2.2, but removed from final gene set v2.3 because transposon-related |
| TMUE_s0469000200 | 678  | TMUE_000256 | Tudor-knot-domain_containing_protein                      | In final gene set v2.3                                                            |
| TMUE_s0508000100 | 417  | TMUE_000391 | Uncharacterized_transposase_protein                       | In gene set v2.2, but removed from final gene set v2.3 because transposon-related |
| TMUE_s1113000100 | 267  | TMUE_000242 | zinc_finger_protein                                       | In final gene set v2.3                                                            |

**Supplementary Table 3a: Gene families showing significant changes (z-score > 1.96) in copy number between clade I species and other nematodes, sorted by total copy number across nematode species.**

| family  | <i>Trichinella spiralis</i> | <i>Bursaphelenchus xylophilus</i> | <i>Brugia malayi</i> | <i>T. muris</i> | <i>C. elegans</i> | <i>T. trichiura</i> | z-score | annotation                                                                                                                                                                                                                                                                                                                                                                                                                                                                                                                                             |
|---------|-----------------------------|-----------------------------------|----------------------|-----------------|-------------------|---------------------|---------|--------------------------------------------------------------------------------------------------------------------------------------------------------------------------------------------------------------------------------------------------------------------------------------------------------------------------------------------------------------------------------------------------------------------------------------------------------------------------------------------------------------------------------------------------------|
| FAM47   | 3                           | 10                                | 8                    | 3               | 8                 | 3                   | 2.666   | Myosin_tail_family_protein,myosin_tail_family_protein,myosin_heavy_chain,_non_muscle                                                                                                                                                                                                                                                                                                                                                                                                                                                                   |
| FAM170  | 4                           | 7                                 | 8                    | 2               | 9                 | 2                   | 2.600   | alpha_tubulin,tubulin_alpha_chain                                                                                                                                                                                                                                                                                                                                                                                                                                                                                                                      |
| FAM256  | 0                           | 10                                | 3                    | 1               | 13                | 1                   | 2.196   | Multidrug_resistance_protein_1                                                                                                                                                                                                                                                                                                                                                                                                                                                                                                                         |
| FAM826  | 0                           | 14                                | 1                    | 0               | 13                | 0                   | 2.041   | NONE                                                                                                                                                                                                                                                                                                                                                                                                                                                                                                                                                   |
| FAM887  | 1                           | 8                                 | 5                    | 0               | 13                | 0                   | 2.384   | NONE                                                                                                                                                                                                                                                                                                                                                                                                                                                                                                                                                   |
| FAM174  | 5                           | 4                                 | 1                    | 5               | 3                 | 5                   | 2.185   | amino_acid_permease,protein_kcc,solute_carrier_family_12                                                                                                                                                                                                                                                                                                                                                                                                                                                                                               |
| FAM1345 | 14                          | 0                                 | 0                    | 4               | 0                 | 5                   | 2.108   | Deoxyribonuclease (DNase) II                                                                                                                                                                                                                                                                                                                                                                                                                                                                                                                           |
| FAM366  | 1                           | 4                                 | 11                   | 1               | 4                 | 1                   | 2.061   | 17_beta_hydroxysteroid_dehydrogenase_type_6                                                                                                                                                                                                                                                                                                                                                                                                                                                                                                            |
| FAM1503 | 13                          | 0                                 | 0                    | 8               | 0                 | 1                   | 1.986   | hypothetical_protein,Pfam-B_11267_and_gag_pre-integrands_and_rve_and_DUF4219_and_RVT_2_and_Pfam-B_4137_and_zf-CCHC_and_Pfam-B_10563_and_UBN2-domain_containing_protein,zf-CCHC_and_UBN2-domain_containing_protein,polypolyprotein,Pfam-B_7383_and_zf-CCHC_and_gag_pre-integrands_and_rve_and_Pfam-B_10563_and_UBN2-domain_containing_protein,Pfam-B_7383_and_Pfam-B_10329_and_zf-CCHC_and_UBN2_2-domain_containing_protein,DUF4219_and_Pfam-B_7383_and_zf-CCHC_and_Pfam-B_4137_and_rve_and_Pfam-B_10563_and_UBN2_2_and_RVT_2-domain_containing_protein |
| FAM1228 | 8                           | 1                                 | 1                    | 5               | 1                 | 5                   | 2.543   | conserved_hypothetical_protein,Pfam-B_310-domain_containing_protein,Pfam-B_2707_and_rve_and_Ribosomal_L50_and_RVT_1-domain_containing_protein,subfamily_M3A_non_peptidase_ue_                                                                                                                                                                                                                                                                                                                                                                          |
| FAM1522 | 1                           | 10                                | 5                    | 0               | 5                 | 0                   | 2.413   | NONE                                                                                                                                                                                                                                                                                                                                                                                                                                                                                                                                                   |
| FAM1515 | 0                           | 8                                 | 3                    | 0               | 10                | 0                   | 2.354   | NONE                                                                                                                                                                                                                                                                                                                                                                                                                                                                                                                                                   |
| FAM87   | 2                           | 5                                 | 3                    | 2               | 6                 | 2                   | 2.284   | heat_shock_protein_70,78_kDa_glucose_regulated_protein                                                                                                                                                                                                                                                                                                                                                                                                                                                                                                 |
| FAM596  | 0                           | 10                                | 2                    | 0               | 8                 | 0                   | 2.221   | NONE                                                                                                                                                                                                                                                                                                                                                                                                                                                                                                                                                   |
| FAM367  | 4                           | 2                                 | 2                    | 5               | 1                 | 5                   | 2.613   | solute_carrier_family_12                                                                                                                                                                                                                                                                                                                                                                                                                                                                                                                               |
| FAM212  | 3                           | 3                                 | 1                    | 5               | 2                 | 5                   | 2.185   | ABC_tran_domain_containing_protein,ABC_transporter,_ATP_binding_protein,ATP_binding_cassette_sub_family_A                                                                                                                                                                                                                                                                                                                                                                                                                                              |
| FAM44   | 4                           | 2                                 | 2                    | 4               | 1                 | 4                   | 2.633   | sodium_driven_chloride_bicarbonate_exchanger,anion_exchange_protein,electrogenic_sodium_bicarbonate_cotransporter                                                                                                                                                                                                                                                                                                                                                                                                                                      |
| FAM144  | 2                           | 3                                 | 4                    | 2               | 4                 | 2                   | 2.543   | 32_kDa_beta_galactoside_binding_lectin,galactoside_binding_lectin_family_protein                                                                                                                                                                                                                                                                                                                                                                                                                                                                       |
| FAM2306 | 1                           | 6                                 | 3                    | 2               | 4                 | 1                   | 2.319   | tyrosine_protein_kinase_Fps85D,Tyrosine_protein_kinase_Fps85D                                                                                                                                                                                                                                                                                                                                                                                                                                                                                          |
| FAM345  | 0                           | 1                                 | 7                    | 1               | 7                 | 1                   | 2.000   | histoneo;_histone_h3;_histone_h1                                                                                                                                                                                                                                                                                                                                                                                                                                                                                                                       |
| FAM150  | 3                           | 4                                 | 3                    | 2               | 3                 | 2                   | 1.993   | protein_unc_g;_protein_unc_f;_protein_unc_d;_protein_unc_b;_protein_unc_a,Muscle_M_line_assembly_protein_unc_89                                                                                                                                                                                                                                                                                                                                                                                                                                        |
| FAM346  | 4                           | 2                                 | 3                    | 3               | 2                 | 3                   | 1.993   | Transmembrane_cell_adhesion_receptor_mua_3                                                                                                                                                                                                                                                                                                                                                                                                                                                                                                             |
| FAM2795 | 5                           | 0                                 | 0                    | 7               | 0                 | 4                   | 2.600   | conserved_hypothetical_protein,zf-CCHC_and_RVT_3_and_Pfam-B_695_and_rve-domain_containing_protein,zf-CCHC_and_RVT_3_and_rve-domain_containing_protein,CRAL_TRIO_and_RVT_3_and_rve-domain_containing_protein                                                                                                                                                                                                                                                                                                                                            |
| FAM1143 | 1                           | 3                                 | 5                    | 2               | 3                 | 2                   | 2.196   | DNA_topoisomerase_2                                                                                                                                                                                                                                                                                                                                                                                                                                                                                                                                    |
| FAM76   | 1                           | 5                                 | 2                    | 2               | 5                 | 1                   | 2.148   | Tubulin_beta_2C_chain,beta_tubulin                                                                                                                                                                                                                                                                                                                                                                                                                                                                                                                     |
| FAM1139 | 2                           | 3                                 | 3                    | 2               | 3                 | 2                   | 2.739   | delta(3'5')_delta(2,4)_dienoyl_coenzyme_a_isomerase,hydroxysteroid_dehydrogenase_protein_2_like                                                                                                                                                                                                                                                                                                                                                                                                                                                        |

|         |   |   |   |   |   |   |       |                                                                                                                                                                                                                                 |
|---------|---|---|---|---|---|---|-------|---------------------------------------------------------------------------------------------------------------------------------------------------------------------------------------------------------------------------------|
| FAM2840 | 1 | 3 | 4 | 1 | 5 | 1 | 2.556 | kunitz:Bovine_pancreatic_trypsin                                                                                                                                                                                                |
| FAM114  | 1 | 4 | 3 | 2 | 3 | 2 | 2.384 | metabotropic_glutamate_receptor_7,glutamate_receptor,_metabotropic_5                                                                                                                                                            |
| FAM956  | 2 | 3 | 4 | 1 | 3 | 2 | 2.384 | SWI:SNF_matrix_associated                                                                                                                                                                                                       |
| FAM1394 | 3 | 1 | 2 | 3 | 2 | 4 | 2.384 | Patched_and_Pfam-B_11358-domain_containing_protein,patched_family_protein                                                                                                                                                       |
| FAM2901 | 0 | 8 | 1 | 0 | 6 | 0 | 2.105 | NONE                                                                                                                                                                                                                            |
| FAM3606 | 4 | 1 | 0 | 4 | 1 | 4 | 2.685 | Pfam-B_10329_and_Asp_protease_2_and_RVT_1_and_Pfam-B_2707-domain_containing_protein,Pfam-B_10329_and_zf-CCHC_and_RVT_1_and_Pfam-B_2707-domain_containing_protein,Pfam-B_10329_and_zf-CCHC-domain_containing_protein,polyprotein |
| FAM306  | 1 | 4 | 3 | 1 | 4 | 1 | 2.657 | protein_UNC_32,_a                                                                                                                                                                                                               |
| FAM1533 | 1 | 3 | 4 | 2 | 3 | 1 | 2.477 | solute_carrier_family_25_4,39S_ribosomal_protein_L13                                                                                                                                                                            |
| FAM233  | 1 | 4 | 2 | 1 | 5 | 1 | 2.284 | arginine_kinase                                                                                                                                                                                                                 |
| FAM365  | 1 | 2 | 4 | 1 | 5 | 1 | 2.284 | protein_CLP_1,_d                                                                                                                                                                                                                |
| FAM2568 | 0 | 7 | 3 | 1 | 3 | 0 | 2.257 | Dehydrogenase:reductase_SDR_family                                                                                                                                                                                              |
| FAM3273 | 0 | 2 | 4 | 0 | 8 | 0 | 2.185 | NONE                                                                                                                                                                                                                            |
| FAM1677 | 1 | 2 | 5 | 2 | 3 | 1 | 1.993 | structural_maintenance_of_chromosomes_protein_3,NADH_dehydrogenase_ubiquinone_Fe_S_protein_2                                                                                                                                    |
| FAM63   | 1 | 4 | 3 | 1 | 3 | 1 | 2.633 | VAB_10A_protein                                                                                                                                                                                                                 |
| FAM2789 | 1 | 3 | 3 | 1 | 4 | 1 | 2.633 | Lactamase_B-domain_containing_protein                                                                                                                                                                                           |
| FAM95   | 1 | 3 | 3 | 1 | 3 | 2 | 2.543 | Troponin_and_Pfam-B_969-domain_containing_protein                                                                                                                                                                               |
| FAM897  | 1 | 2 | 4 | 1 | 4 | 1 | 2.378 | protein_spinster_1                                                                                                                                                                                                              |
| FAM1036 | 1 | 4 | 4 | 1 | 2 | 1 | 2.378 | NDT80:_PhoGDNA_binding_family_protein                                                                                                                                                                                           |
| FAM1684 | 1 | 2 | 3 | 1 | 5 | 1 | 2.185 | sideroflexin_1                                                                                                                                                                                                                  |
| FAM3757 | 0 | 6 | 1 | 0 | 6 | 0 | 2.171 | NONE                                                                                                                                                                                                                            |
| FAM2739 | 3 | 2 | 1 | 4 | 1 | 2 | 2.138 | N_acetyltransferase_10,Trehalase_family_protein                                                                                                                                                                                 |
| FAM3667 | 1 | 2 | 4 | 1 | 3 | 2 | 2.138 | conserved_hypothetical_protein                                                                                                                                                                                                  |
| FAM3685 | 0 | 3 | 2 | 0 | 7 | 1 | 2.084 | NONE                                                                                                                                                                                                                            |
| FAM3669 | 0 | 2 | 3 | 2 | 5 | 1 | 2.032 | DUF290-domain_containing_protein                                                                                                                                                                                                |

**Supplementary Table 3b: Shared gene families showing significant changes (z-score > 1.96) in copy number between *Trichuris muris* and other nematodes, sorted by absolute z-score (normalised difference in gene copy number).**

| family  | <i>Trichinella spiralis</i> | <i>Bursaphelenchus xylophilus</i> | <i>Brugia malayi</i> | <i>T. muris</i> | <i>C. elegans</i> | <i>T. trichiura</i> | z-score | annotation                                                        |
|---------|-----------------------------|-----------------------------------|----------------------|-----------------|-------------------|---------------------|---------|-------------------------------------------------------------------|
| FAM139  | 1                           | 1                                 | 1                    | 2               | 1                 | 1                   | 2.041   | HMG_box_family_protein,protein_pangolin,s_A:H:I                   |
| FAM502  | 1                           | 1                                 | 1                    | 2               | 1                 | 1                   | 2.041   | DnaJ_protein_subfamily_B_B,DnaJ_domain_containing_protein         |
| FAM1093 | 1                           | 1                                 | 1                    | 2               | 1                 | 1                   | 2.041   | TPR_Domain_containing_protein,tetratricopeptide_repeat_containing |

|         |   |   |   |    |   |   |        |                                                                                                                                                                                                                                                                                        |
|---------|---|---|---|----|---|---|--------|----------------------------------------------------------------------------------------------------------------------------------------------------------------------------------------------------------------------------------------------------------------------------------------|
| FAM1453 | 1 | 1 | 1 | 2  | 1 | 1 | 2.041  | Glyco_hydro_38_and_Alpha-mann_mid_and_Glyco_hydro_38C-domain_containing_protein,alpha_mannosidase_2x                                                                                                                                                                                   |
| FAM1626 | 1 | 1 | 1 | 2  | 1 | 1 | 2.041  | zinc_transporter_zip1,metal_cation_transporter,_zinc                                                                                                                                                                                                                                   |
| FAM1752 | 1 | 1 | 1 | 2  | 1 | 1 | 2.041  | UQ_con-domain_containing_protein                                                                                                                                                                                                                                                       |
| FAM1800 | 1 | 1 | 1 | 2  | 1 | 1 | 2.041  | conserved_hypothetical_protein,DNA_polymerase_lambda                                                                                                                                                                                                                                   |
| FAM1809 | 1 | 1 | 1 | 2  | 1 | 1 | 2.041  | conserved_hypothetical_protein,Meckel_syndrome_type_1_protein                                                                                                                                                                                                                          |
| FAM2357 | 1 | 1 | 1 | 2  | 1 | 1 | 2.041  | NADH_dehydrogenase_(ubiquinone)_iron_sulfur                                                                                                                                                                                                                                            |
| FAM2751 | 1 | 1 | 1 | 2  | 1 | 1 | 2.041  | 28S_ribosomal_protein_S28,_mitochondrial,Mesd-domain_containing_protein                                                                                                                                                                                                                |
| FAM2960 | 1 | 1 | 1 | 2  | 1 | 1 | 2.041  | rho_associated_protein_kinase_2,Pkinase_domain_containing_protein                                                                                                                                                                                                                      |
| FAM3155 | 1 | 1 | 1 | 2  | 1 | 1 | 2.041  | NifU_N-domain_containing_protein                                                                                                                                                                                                                                                       |
| FAM3560 | 1 | 1 | 1 | 2  | 1 | 1 | 2.041  | N_alpha_acetyltransferase_15,_NatA_auxiliary                                                                                                                                                                                                                                           |
| FAM3577 | 1 | 1 | 1 | 2  | 1 | 1 | 2.041  | structural_maintenance_of_chromosomes_protein                                                                                                                                                                                                                                          |
| FAM3813 | 1 | 1 | 1 | 2  | 1 | 1 | 2.041  | AAA-domain_containing_protein,vesicle_fusing_ATPase_1                                                                                                                                                                                                                                  |
| FAM3914 | 1 | 1 | 1 | 2  | 1 | 1 | 2.041  | 26S_proteasome_non_ATPase_regulatory_subunit_1,26S_proteasome_non_ATPase_regulatory_subunit                                                                                                                                                                                            |
| FAM3930 | 1 | 1 | 1 | 2  | 1 | 1 | 2.041  | PGM_PMM_II_and_PGM_PMM_III_and_PGM_PMM_I_and_PGM_PMM_IV-domain_containing_protein,glucose_1,6_bisphosphate_synthase                                                                                                                                                                    |
| FAM5175 | 1 | 1 | 1 | 2  | 1 | 1 | 2.041  | T_complex_protein_1_theta_subunit,T_complex_protein_1_subunit_theta                                                                                                                                                                                                                    |
| FAM5248 | 1 | 1 | 1 | 2  | 1 | 1 | 2.041  | splicing_factor,_arginine:serine_rich                                                                                                                                                                                                                                                  |
| FAM5276 | 1 | 1 | 1 | 2  | 1 | 1 | 2.041  | DNA_polymerase_eta                                                                                                                                                                                                                                                                     |
| FAM5676 | 1 | 1 | 1 | 2  | 1 | 1 | 2.041  | conserved_hypothetical_protein,Ank_2_and_Ank-domain_containing_protein                                                                                                                                                                                                                 |
| FAM7549 | 1 | 1 | 1 | 2  | 1 | 1 | 2.041  | macrophage_migration_inhibitory_factor                                                                                                                                                                                                                                                 |
| FAM4133 | 2 | 2 | 2 | 1  | 2 | 2 | -2.041 | thioredoxin_protein_4A_like                                                                                                                                                                                                                                                            |
| FAM217  | 0 | 1 | 1 | 47 | 1 | 0 | 2.041  | conserved_hypothetical_protein,hypothetical_protein                                                                                                                                                                                                                                    |
| FAM1495 | 0 | 1 | 0 | 18 | 0 | 0 | 2.038  | hypothetical_protein,conserved_hypothetical_protein,jerky_protein                                                                                                                                                                                                                      |
| FAM2218 | 0 | 0 | 0 | 17 | 0 | 1 | 2.038  | conserved_hypothetical_protein,Pao_retrotransposon_peptidase_superfamily,zinc_knuckle_protein,Gag_Pol_polyprotein                                                                                                                                                                      |
| FAM2502 | 0 | 0 | 0 | 16 | 0 | 1 | 2.037  | hypothetical_protein,conserved_hypothetical_protein                                                                                                                                                                                                                                    |
| FAM7548 | 0 | 0 | 0 | 7  | 0 | 1 | 2.020  | actin_protein_6A_like,Actin-domain_containing_protein                                                                                                                                                                                                                                  |
| FAM6042 | 1 | 0 | 0 | 8  | 0 | 1 | 2.016  | conserved_hypothetical_protein,zf-C2H2_4_and_zf-C2H2-domain_containing_protein,zinc_finger_protein,zinc_finger_protein_569,zf-C2H2_4_and_zf-C2H2_and_zf-H2C2_2-domain_containing_protein,zinc_finger_protein_729,pita,_B,zf-H2C2_2_and_zf-C2H2_4_and_zf-C2H2-domain_containing_protein |
| FAM8363 | 0 | 0 | 0 | 6  | 0 | 1 | 2.013  | hypothetical_protein                                                                                                                                                                                                                                                                   |
| FAM8370 | 0 | 0 | 0 | 6  | 0 | 1 | 2.013  | CUG-BP-and_ETR-3-like_factor_3,hypothetical_protein,Calcium_channel_protein,_putative                                                                                                                                                                                                  |
| FAM2217 | 0 | 0 | 0 | 15 | 0 | 3 | 2.000  | transposase,conserved_hypothetical_protein,Putative_tick_transposon,Pfam-B_19879-domain_containing_protein,hypothetical_protein,reverse_transcriptase                                                                                                                                  |
| FAM9301 | 0 | 0 | 0 | 5  | 0 | 1 | 2.000  | Pfam-B_10329-domain_containing_protein,reverse_transcriptase_family_protein                                                                                                                                                                                                            |
| FAM9306 | 0 | 0 | 0 | 5  | 0 | 1 | 2.000  | conserved_hypothetical_protein,hypothetical_protein                                                                                                                                                                                                                                    |

|          |   |   |   |   |   |   |       |                                                                                                                                                                                                                                                                                                                                                                                                                                                                                                                                        |
|----------|---|---|---|---|---|---|-------|----------------------------------------------------------------------------------------------------------------------------------------------------------------------------------------------------------------------------------------------------------------------------------------------------------------------------------------------------------------------------------------------------------------------------------------------------------------------------------------------------------------------------------------|
| FAM9307  | 0 | 0 | 0 | 5 | 0 | 1 | 2.000 | conserved_hypothetical_protein                                                                                                                                                                                                                                                                                                                                                                                                                                                                                                         |
| FAM7545  | 1 | 0 | 0 | 6 | 0 | 1 | 1.996 | reverse_transcriptase:endonuclease,reverse_transcriptase,Pfam-B_595-domain_containing_protein                                                                                                                                                                                                                                                                                                                                                                                                                                          |
| FAM5503  | 1 | 1 | 0 | 6 | 0 | 1 | 1.993 | zf-CCHC_and_Pfam-B_2545_and_Asp_protease_2_and_Pfam-B_2707_and_rve-domain_containing_protein,Gap_Pol_polyprotein,rve_and_Pfam-B_10563_and_zf-CCHC_and_Pfam-B_2545_and_Asp_protease_2_and_RVT_1_and_Pfam-B_2707-domain_containing_protein,rve_and_zf-CCHC_and_Pfam-B_10329_and_RVT_1_and_Pfam-B_2707-domain_containing_protein,zf-CCHC_and_Asp_protease_2_and_Pfam-B_10329_and_RVT_1-domain_containing_protein,zf-H2C2_and_rve_and_Pfam-B_10329_and_zf-CCHC_and_Pfam-B_2545_and_RVP_and_RVT_1_and_Pfam-B_2707-domain_containing_protein |
| FAM5304  | 0 | 0 | 0 | 9 | 0 | 2 | 1.990 | conserved_hypothetical_protein,Pfam-B_19879-domain_containing_protein,ankyrin_2,3:unc44,reverse_transcriptase                                                                                                                                                                                                                                                                                                                                                                                                                          |
| FAM6039  | 2 | 0 | 0 | 8 | 0 | 0 | 1.977 | Pfam-B_310-domain_containing_protein,something_about_silencing_protein_10                                                                                                                                                                                                                                                                                                                                                                                                                                                              |
| FAM10557 | 0 | 0 | 0 | 4 | 0 | 1 | 1.977 | CAP_domain_containing_protein,CAP-domain_containing_protein,Pfam-B_19232_and_CAP-domain_containing_protein                                                                                                                                                                                                                                                                                                                                                                                                                             |
| FAM10561 | 0 | 0 | 0 | 4 | 0 | 1 | 1.977 | gag_pol_polyprotein,hypothetical_protein                                                                                                                                                                                                                                                                                                                                                                                                                                                                                               |

**Supplementary Table 3c: Shared gene families showing significant changes (z-score > 1.96) in copy number between *Trichuris trichiura* and other nematodes, sorted by absolute z-score (normalised difference in gene copy number).**

| family  | <i>Trichinella spiralis</i> | <i>Bursaphelenchus xylophilus</i> | <i>Brugia malayi</i> | <i>T. muris</i> | <i>C. elegans</i> | <i>T. trichiura</i> | z-score | annotation                                                          |
|---------|-----------------------------|-----------------------------------|----------------------|-----------------|-------------------|---------------------|---------|---------------------------------------------------------------------|
| FAM202  | 1                           | 1                                 | 1                    | 1               | 1                 | 3                   | 2.041   | valyl_tRNA_synthetase                                               |
| FAM1105 | 1                           | 1                                 | 1                    | 1               | 1                 | 3                   | 2.041   | Pfam-B_888-domain_containing_protein                                |
| FAM2967 | 1                           | 1                                 | 1                    | 1               | 1                 | 3                   | 2.041   | glutamate_synthase                                                  |
| FAM4025 | 1                           | 1                                 | 1                    | 1               | 1                 | 3                   | 2.041   | ATP_synthase_subunit_alpha,_mitochondrial                           |
| FAM4497 | 1                           | 1                                 | 1                    | 1               | 1                 | 3                   | 2.041   | ADP_ribosylation_factor_protein_2_like                              |
| FAM5073 | 1                           | 1                                 | 1                    | 1               | 1                 | 3                   | 2.041   | WD_repeat_containing_protein_54                                     |
| FAM5285 | 1                           | 1                                 | 1                    | 1               | 1                 | 3                   | 2.041   | Pfam-B_5851_and_DUF3677-domain_containing_protein                   |
| FAM79   | 1                           | 1                                 | 1                    | 1               | 1                 | 2                   | 2.041   | transcription_factor_E2_alpha                                       |
| FAM724  | 1                           | 1                                 | 1                    | 1               | 1                 | 2                   | 2.041   | Leucine_rich_repeat_and_calponiny                                   |
| FAM915  | 1                           | 1                                 | 1                    | 1               | 1                 | 2                   | 2.041   | microtubule_associated_serine:threonine_protein                     |
| FAM1450 | 1                           | 1                                 | 1                    | 1               | 1                 | 2                   | 2.041   | protein_slowmo                                                      |
| FAM1755 | 1                           | 1                                 | 1                    | 1               | 1                 | 2                   | 2.041   | phosphorylase_b_kinase_gamma_catalytic_chain                        |
| FAM1923 | 1                           | 1                                 | 1                    | 1               | 1                 | 2                   | 2.041   | SYS1_Golgi_localized_integral_membrane_protein                      |
| FAM2403 | 1                           | 1                                 | 1                    | 1               | 1                 | 2                   | 2.041   | Pkinase_and_TRAPP-domain_containing_protein                         |
| FAM2409 | 1                           | 1                                 | 1                    | 1               | 1                 | 2                   | 2.041   | 40S_ribosomal_protein_S15                                           |
| FAM2480 | 1                           | 1                                 | 1                    | 1               | 1                 | 2                   | 2.041   | WD40_and_CARD_and_NB-ARC_and_Pfam-B_10185-domain_containing_protein |
| FAM2757 | 1                           | 1                                 | 1                    | 1               | 1                 | 2                   | 2.041   | mitochondrial_tRNA_specific_2_thiouridylase                         |

|         |   |   |   |   |   |    |        |                                                                               |
|---------|---|---|---|---|---|----|--------|-------------------------------------------------------------------------------|
| FAM3201 | 1 | 1 | 1 | 1 | 1 | 2  | 2.041  | 2OG-Fell_Oxy_3_and_Ofd1_CTDD_and_Pfam-B_9093-domain_containing_protein        |
| FAM3383 | 1 | 1 | 1 | 1 | 1 | 2  | 2.041  | protein_yippee_5_like                                                         |
| FAM3421 | 1 | 1 | 1 | 1 | 1 | 2  | 2.041  | polypeptide_n_acetylgalactosaminyltransferase_3                               |
| FAM3430 | 1 | 1 | 1 | 1 | 1 | 2  | 2.041  | 28S_ribosomal_protein_S7_mitochondrial                                        |
| FAM3783 | 1 | 1 | 1 | 1 | 1 | 2  | 2.041  | serine:threonine_protein_phosphatase_PGAM5                                    |
| FAM3803 | 1 | 1 | 1 | 1 | 1 | 2  | 2.041  | MAP_kinase_activating_protein_C22orf5                                         |
| FAM3836 | 1 | 1 | 1 | 1 | 1 | 2  | 2.041  | ATP_synthase_subunit_beta                                                     |
| FAM3869 | 1 | 1 | 1 | 1 | 1 | 2  | 2.041  | 60S_ribosomal_protein_L37a                                                    |
| FAM3880 | 1 | 1 | 1 | 1 | 1 | 2  | 2.041  | ribosomal_protein_L7                                                          |
| FAM3942 | 1 | 1 | 1 | 1 | 1 | 2  | 2.041  | glucose_6_phosphate_isomerase                                                 |
| FAM3967 | 1 | 1 | 1 | 1 | 1 | 2  | 2.041  | RNA_exonuclease_1                                                             |
| FAM4382 | 1 | 1 | 1 | 1 | 1 | 2  | 2.041  | dolichyl_pyrophosphate_Man9GlcNAc2                                            |
| FAM4412 | 1 | 1 | 1 | 1 | 1 | 2  | 2.041  | tetratricopeptide_repeat_protein_35_B                                         |
| FAM4530 | 1 | 1 | 1 | 1 | 1 | 2  | 2.041  | mRNA_capping_enzyme                                                           |
| FAM4544 | 1 | 1 | 1 | 1 | 1 | 2  | 2.041  | leucyl_tRNA_synthetase_cytoplasmic                                            |
| FAM4594 | 1 | 1 | 1 | 1 | 1 | 2  | 2.041  | methyltransferase_protein_4_like                                              |
| FAM4937 | 1 | 1 | 1 | 1 | 1 | 2  | 2.041  | acetyl_coenzyme_A_transporter_1                                               |
| FAM5283 | 1 | 1 | 1 | 1 | 1 | 2  | 2.041  | HCO3_transporter_family_protein                                               |
| FAM5711 | 1 | 1 | 1 | 1 | 1 | 2  | 2.041  | Exo_endo_phos_and_zf-RING_2-domain_containing_protein                         |
| FAM5894 | 1 | 1 | 1 | 1 | 1 | 2  | 2.041  | Apoptosis_linked_gene_2_interacting_protein_X_1                               |
| FAM6002 | 1 | 1 | 1 | 1 | 1 | 2  | 2.041  | histone_deacetylase_complex_subunit_SAP18                                     |
| FAM6953 | 1 | 1 | 1 | 1 | 1 | 2  | 2.041  | Brix-domain_containing_protein                                                |
| FAM7748 | 1 | 1 | 1 | 1 | 1 | 2  | 2.041  | monocarboxylate_transporter_3                                                 |
| FAM8613 | 1 | 1 | 1 | 1 | 1 | 2  | 2.041  | Pfam-B_1741-domain_containing_protein                                         |
| FAM1860 | 2 | 2 | 2 | 2 | 2 | 1  | -2.041 | TM2-domain_containing_protein,mitochondrial_import_inner_membrane_translocase |
| FAM1966 | 2 | 2 | 2 | 2 | 2 | 1  | -2.041 | beta_lactamase_protein_2_like,L_aminoadipate_semialdehyde                     |
| FAM4665 | 0 | 0 | 0 | 1 | 0 | 11 | 2.033  | neurogenic_locus_notch_protein_2                                              |
| FAM4666 | 0 | 0 | 1 | 0 | 0 | 11 | 2.033  | NONE                                                                          |
| FAM3206 | 0 | 0 | 1 | 0 | 1 | 11 | 2.028  | NONE                                                                          |
| FAM8398 | 0 | 0 | 0 | 1 | 0 | 6  | 2.013  | hypothetical_protein                                                          |
| FAM8401 | 1 | 0 | 0 | 0 | 0 | 6  | 2.013  | NONE                                                                          |
| FAM1027 | 1 | 0 | 0 | 4 | 0 | 21 | 2.005  | hypothetical_protein,Pfam-B_6031_and_Pfam-B_2655-domain_containing_protein    |
| FAM9344 | 0 | 0 | 0 | 1 | 0 | 5  | 2.000  | Pfam-B_9093-domain_containing_protein                                         |

**Supplementary Table 3d: Gene families missing from *Trichuris muris* showing significant changes (z-score > 1.96) in copy number across nematodes, sorted by total copy number (NB: all significant families are conserved single-copy genes in other nematode species).**

| family  | <i>Trichinella spiralis</i> | <i>Bursaphelenchus xylophilus</i> | <i>Brugia malayi</i> | <i>T. muris</i> | <i>C. elegans</i> | <i>T. trichiura</i> | z-score | annotation |
|---------|-----------------------------|-----------------------------------|----------------------|-----------------|-------------------|---------------------|---------|------------|
| FAM319  | 1                           | 1                                 | 1                    | 0               | 1                 | 1                   | -2.041  | NONE       |
| FAM443  | 1                           | 1                                 | 1                    | 0               | 1                 | 1                   | -2.041  | NONE       |
| FAM677  | 1                           | 1                                 | 1                    | 0               | 1                 | 1                   | -2.041  | NONE       |
| FAM736  | 1                           | 1                                 | 1                    | 0               | 1                 | 1                   | -2.041  | NONE       |
| FAM1460 | 1                           | 1                                 | 1                    | 0               | 1                 | 1                   | -2.041  | NONE       |
| FAM1601 | 1                           | 1                                 | 1                    | 0               | 1                 | 1                   | -2.041  | NONE       |
| FAM2390 | 1                           | 1                                 | 1                    | 0               | 1                 | 1                   | -2.041  | NONE       |
| FAM2392 | 1                           | 1                                 | 1                    | 0               | 1                 | 1                   | -2.041  | NONE       |
| FAM2454 | 1                           | 1                                 | 1                    | 0               | 1                 | 1                   | -2.041  | NONE       |
| FAM2456 | 1                           | 1                                 | 1                    | 0               | 1                 | 1                   | -2.041  | NONE       |
| FAM2641 | 1                           | 1                                 | 1                    | 0               | 1                 | 1                   | -2.041  | NONE       |
| FAM2713 | 1                           | 1                                 | 1                    | 0               | 1                 | 1                   | -2.041  | NONE       |
| FAM2955 | 1                           | 1                                 | 1                    | 0               | 1                 | 1                   | -2.041  | NONE       |
| FAM3007 | 1                           | 1                                 | 1                    | 0               | 1                 | 1                   | -2.041  | NONE       |
| FAM3016 | 1                           | 1                                 | 1                    | 0               | 1                 | 1                   | -2.041  | NONE       |
| FAM3046 | 1                           | 1                                 | 1                    | 0               | 1                 | 1                   | -2.041  | NONE       |
| FAM3113 | 1                           | 1                                 | 1                    | 0               | 1                 | 1                   | -2.041  | NONE       |
| FAM3394 | 1                           | 1                                 | 1                    | 0               | 1                 | 1                   | -2.041  | NONE       |
| FAM3789 | 1                           | 1                                 | 1                    | 0               | 1                 | 1                   | -2.041  | NONE       |
| FAM3812 | 1                           | 1                                 | 1                    | 0               | 1                 | 1                   | -2.041  | NONE       |
| FAM3872 | 1                           | 1                                 | 1                    | 0               | 1                 | 1                   | -2.041  | NONE       |
| FAM3886 | 1                           | 1                                 | 1                    | 0               | 1                 | 1                   | -2.041  | NONE       |
| FAM4081 | 1                           | 1                                 | 1                    | 0               | 1                 | 1                   | -2.041  | NONE       |
| FAM4334 | 1                           | 1                                 | 1                    | 0               | 1                 | 1                   | -2.041  | NONE       |
| FAM4410 | 1                           | 1                                 | 1                    | 0               | 1                 | 1                   | -2.041  | NONE       |
| FAM4512 | 1                           | 1                                 | 1                    | 0               | 1                 | 1                   | -2.041  | NONE       |
| FAM4526 | 1                           | 1                                 | 1                    | 0               | 1                 | 1                   | -2.041  | NONE       |



|         |   |   |   |   |   |   |        |      |
|---------|---|---|---|---|---|---|--------|------|
| FAM4536 | 1 | 1 | 1 | 0 | 1 | 1 | -2.041 | NONE |
| FAM4906 | 1 | 1 | 1 | 0 | 1 | 1 | -2.041 | NONE |
| FAM4997 | 1 | 1 | 1 | 0 | 1 | 1 | -2.041 | NONE |
| FAM5003 | 1 | 1 | 1 | 0 | 1 | 1 | -2.041 | NONE |
| FAM5219 | 1 | 1 | 1 | 0 | 1 | 1 | -2.041 | NONE |
| FAM5260 | 1 | 1 | 1 | 0 | 1 | 1 | -2.041 | NONE |
| FAM5669 | 1 | 1 | 1 | 0 | 1 | 1 | -2.041 | NONE |
| FAM5862 | 1 | 1 | 1 | 0 | 1 | 1 | -2.041 | NONE |
| FAM5879 | 1 | 1 | 1 | 0 | 1 | 1 | -2.041 | NONE |
| FAM5931 | 1 | 1 | 1 | 0 | 1 | 1 | -2.041 | NONE |
| FAM5953 | 1 | 1 | 1 | 0 | 1 | 1 | -2.041 | NONE |
| FAM6419 | 1 | 1 | 1 | 0 | 1 | 1 | -2.041 | NONE |
| FAM6473 | 1 | 1 | 1 | 0 | 1 | 1 | -2.041 | NONE |
| FAM6602 | 1 | 1 | 1 | 0 | 1 | 1 | -2.041 | NONE |
| FAM6705 | 1 | 1 | 1 | 0 | 1 | 1 | -2.041 | NONE |
| FAM6745 | 1 | 1 | 1 | 0 | 1 | 1 | -2.041 | NONE |
| FAM7085 | 1 | 1 | 1 | 0 | 1 | 1 | -2.041 | NONE |
| FAM7089 | 1 | 1 | 1 | 0 | 1 | 1 | -2.041 | NONE |
| FAM7156 | 1 | 1 | 1 | 0 | 1 | 1 | -2.041 | NONE |
| FAM7191 | 1 | 1 | 1 | 0 | 1 | 1 | -2.041 | NONE |
| FAM7249 | 1 | 1 | 1 | 0 | 1 | 1 | -2.041 | NONE |
| FAM7371 | 1 | 1 | 1 | 0 | 1 | 1 | -2.041 | NONE |
| FAM7414 | 1 | 1 | 1 | 0 | 1 | 1 | -2.041 | NONE |

**Supplementary Table 3e: Gene families missing from *Trichuris trichiura* showing significant changes (z-score > 1.96) in copy number across nematodes, sorted by total copy number (NB: all significant families are conserved single-copy genes in other nematode species).**

| family | <i>Trichinella spiralis</i> | <i>Bursaphelenchus xylophilus</i> | <i>Brugia malayi</i> | <i>T. muris</i> | <i>C. elegans</i> | <i>T. trichiura</i> | z-score | annotation                                      |
|--------|-----------------------------|-----------------------------------|----------------------|-----------------|-------------------|---------------------|---------|-------------------------------------------------|
| FAM93  | 1                           | 1                                 | 1                    | 1               | 1                 | 0                   | -2.041  | EGF_CA-domain_containing_protein                |
| FAM194 | 1                           | 1                                 | 1                    | 1               | 1                 | 0                   | -2.041  | Tweety-domain_containing_protein                |
| FAM441 | 1                           | 1                                 | 1                    | 1               | 1                 | 0                   | -2.041  | solute_carrier_organic_anion_transporter_family |
| FAM499 | 1                           | 1                                 | 1                    | 1               | 1                 | 0                   | -2.041  | scaffold_attachment_factor_B1                   |
| FAM730 | 1                           | 1                                 | 1                    | 1               | 1                 | 0                   | -2.041  | uDENN_and_DENN-domain_containing_protein        |

|         |   |   |   |   |   |   |        |                                                                |
|---------|---|---|---|---|---|---|--------|----------------------------------------------------------------|
| FAM1171 | 1 | 1 | 1 | 1 | 1 | 0 | -2.041 | E3_ubiquitin_protein_ligase_makorin_1                          |
| FAM1301 | 1 | 1 | 1 | 1 | 1 | 0 | -2.041 | Synaptosomal_associated_protein_25                             |
| FAM1724 | 1 | 1 | 1 | 1 | 1 | 0 | -2.041 | calnexin                                                       |
| FAM2673 | 1 | 1 | 1 | 1 | 1 | 0 | -2.041 | dNK-domain_containing_protein                                  |
| FAM2758 | 1 | 1 | 1 | 1 | 1 | 0 | -2.041 | polymerase_(RNA)_II_(DNA_directed)_polypeptide                 |
| FAM2923 | 1 | 1 | 1 | 1 | 1 | 0 | -2.041 | pyroglutamyl_peptidase_1                                       |
| FAM2990 | 1 | 1 | 1 | 1 | 1 | 0 | -2.041 | NADH_ubiquinone_oxidoreductase_15_kDa_subunit                  |
| FAM3108 | 1 | 1 | 1 | 1 | 1 | 0 | -2.041 | thiosulfate_sulfurtransferase                                  |
| FAM3410 | 1 | 1 | 1 | 1 | 1 | 0 | -2.041 | Dihydropteridine_reductase                                     |
| FAM3483 | 1 | 1 | 1 | 1 | 1 | 0 | -2.041 | splicing_factor_45                                             |
| FAM3524 | 1 | 1 | 1 | 1 | 1 | 0 | -2.041 | biogenesis_of_lyosome_organelles                               |
| FAM3794 | 1 | 1 | 1 | 1 | 1 | 0 | -2.041 | Activator_of_basal_transcription_1                             |
| FAM3800 | 1 | 1 | 1 | 1 | 1 | 0 | -2.041 | DUF2615-domain_containing_protein                              |
| FAM3864 | 1 | 1 | 1 | 1 | 1 | 0 | -2.041 | vATP-synt_E_and_Urm1-domain_containing_protein                 |
| FAM4071 | 1 | 1 | 1 | 1 | 1 | 0 | -2.041 | Pfam-B_5334-domain_containing_protein                          |
| FAM4482 | 1 | 1 | 1 | 1 | 1 | 0 | -2.041 | peptidyl_prolyl_cis_trans_isomerase                            |
| FAM4545 | 1 | 1 | 1 | 1 | 1 | 0 | -2.041 | fibroblast_growth_factor                                       |
| FAM4943 | 1 | 1 | 1 | 1 | 1 | 0 | -2.041 | NEDD8_activating_enzyme_E1_regulatory_subunit                  |
| FAM5084 | 1 | 1 | 1 | 1 | 1 | 0 | -2.041 | Dnaj-domain_containing_protein                                 |
| FAM5806 | 1 | 1 | 1 | 1 | 1 | 0 | -2.041 | Pterin_4a_domain_containing_protein                            |
| FAM5897 | 1 | 1 | 1 | 1 | 1 | 0 | -2.041 | cytochrome_c                                                   |
| FAM6400 | 1 | 1 | 1 | 1 | 1 | 0 | -2.041 | Pfam-B_12879_and_DUF4187_and_G-patch-domain_containing_protein |
| FAM7128 | 1 | 1 | 1 | 1 | 1 | 0 | -2.041 | prefoldin_subunit_2                                            |
| FAM7166 | 1 | 1 | 1 | 1 | 1 | 0 | -2.041 | FAS_associated_factor_2_B                                      |
| FAM7222 | 1 | 1 | 1 | 1 | 1 | 0 | -2.041 | poly_(ADP_ribose)_polymerase_1                                 |
| FAM7447 | 1 | 1 | 1 | 1 | 1 | 0 | -2.041 | TAP42-domain_containing_protein                                |
| FAM7473 | 1 | 1 | 1 | 1 | 1 | 0 | -2.041 | Prefoldin_2-domain_containing_protein                          |
| FAM7480 | 1 | 1 | 1 | 1 | 1 | 0 | -2.041 | tRNA_pseudouridine_synthase_2                                  |
| FAM7483 | 1 | 1 | 1 | 1 | 1 | 0 | -2.041 | XPA_C-domain_containing_protein                                |
| FAM8017 | 1 | 1 | 1 | 1 | 1 | 0 | -2.041 | conserved_hypothetical_protein                                 |
| FAM8163 | 1 | 1 | 1 | 1 | 1 | 0 | -2.041 | heat_shock_70_kDa_protein_13                                   |
| FAM8601 | 1 | 1 | 1 | 1 | 1 | 0 | -2.041 | proteasome_subunit_beta_type_1                                 |
| FAM8606 | 1 | 1 | 1 | 1 | 1 | 0 | -2.041 | pre_mrna_splicing_factor_spf27                                 |

|          |   |   |   |   |   |   |        |                                               |
|----------|---|---|---|---|---|---|--------|-----------------------------------------------|
| FAM8628  | 1 | 1 | 1 | 1 | 1 | 0 | -2.041 | nitrogen_permease_regulator_2_protein_like    |
| FAM9771  | 1 | 1 | 1 | 1 | 1 | 0 | -2.041 | ras_family_small_GTPase                       |
| FAM9812  | 1 | 1 | 1 | 1 | 1 | 0 | -2.041 | L_threonine_3_dehydrogenase_mitochondrial     |
| FAM11057 | 1 | 1 | 1 | 1 | 1 | 0 | -2.041 | 39S_ribosomal_protein_L20_mitochondrial       |
| FAM11058 | 1 | 1 | 1 | 1 | 1 | 0 | -2.041 | l-set-domain_containing_protein               |
| FAM11079 | 1 | 1 | 1 | 1 | 1 | 0 | -2.041 | Methyltransf_11-domain_containing_protein     |
| FAM11122 | 1 | 1 | 1 | 1 | 1 | 0 | -2.041 | Leucine_rich_repeat_containing_protein_15     |
| FAM11132 | 1 | 1 | 1 | 1 | 1 | 0 | -2.041 | Pfam-B_1741-domain_containing_protein         |
| FAM11138 | 1 | 1 | 1 | 1 | 1 | 0 | -2.041 | polypeptide_n_acetylgalactosaminyltransferase |

**Supplementary Table 3f: Largest gene families in *Trichuris muris*, sorted by *T. muris* copy number.**

| family  | <i>Trichinella spiralis</i> | <i>Bursaphelenchus xylophilus</i> | <i>Brugia malayi</i> | <i>T. muris</i> | <i>C. elegans</i> | <i>T. trichiura</i> | annotation                                                                                                                                                                                                                                                                                                                                                                                                                                                                                                                                                                                                                                                                                                                  |
|---------|-----------------------------|-----------------------------------|----------------------|-----------------|-------------------|---------------------|-----------------------------------------------------------------------------------------------------------------------------------------------------------------------------------------------------------------------------------------------------------------------------------------------------------------------------------------------------------------------------------------------------------------------------------------------------------------------------------------------------------------------------------------------------------------------------------------------------------------------------------------------------------------------------------------------------------------------------|
| FAM217  | 0                           | 1                                 | 1                    | 47              | 1                 | 0                   | conserved_hypothetical_protein,hypothetical_protein                                                                                                                                                                                                                                                                                                                                                                                                                                                                                                                                                                                                                                                                         |
| FAM806  | 0                           | 0                                 | 0                    | 29              | 0                 | 0                   | hypothetical_protein,Pfam-B_7026-domain_containing_protein,Pfam-B_19346-domain_containing_protein,Pfam-B_7026_and_Pfam-B_16276-domain_containing_protein,F domain_containing_protein                                                                                                                                                                                                                                                                                                                                                                                                                                                                                                                                        |
| FAM1124 | 0                           | 0                                 | 0                    | 25              | 0                 | 0                   | conserved_hypothetical_protein,hypothetical_protein                                                                                                                                                                                                                                                                                                                                                                                                                                                                                                                                                                                                                                                                         |
| FAM2    | 86                          | 2                                 | 793                  | 24              | 1                 | 14                  | DUF1759_and_DUF1758-domain_containing_protein,Peptidase_A17_and_rve_and_DUF1759_and_DUF1758-domain_containing_protein,Pao_retrotransposon_peptidase_sup domain_containing_protein,rve_and_DUF1758_and_RVT_1_and_Peptidase_A17-domain_containing_protein,DUF1758_and_RVT_1_and_Peptidase_A17-domain_containing_p domain_containing_protein,RVT_1_and_Peptidase_A17_and_DUF1758-domain_containing_protein,Peptidase_A17_and_DUF1759_and_DUF1758-domain_containing_protein domain_containing_protein,Tas_retrotransposon_peptidase_A16_superfamily,rve_and_DUF1758_and_Peptidase_A17-domain_containing_protein,DUF1759_and_DUF1758_a domain_containing_protein,DUF1759_and_DUF1758_and_Peptidase_A17-domain_containing_protein |
| FAM1344 | 0                           | 0                                 | 0                    | 23              | 0                 | 0                   | RNA_dependent_RNA_polymerase,Mononeg_RNA_pol-domain_containing_protein,large_protein,hypothetical_protein,polymerase                                                                                                                                                                                                                                                                                                                                                                                                                                                                                                                                                                                                        |
| FAM1988 | 0                           | 0                                 | 0                    | 19              | 0                 | 0                   | conserved_hypothetical_protein,tigger_transposable_element_derived_protein,hypothetical_protein                                                                                                                                                                                                                                                                                                                                                                                                                                                                                                                                                                                                                             |
| FAM1495 | 0                           | 1                                 | 0                    | 18              | 0                 | 0                   | hypothetical_protein,conserved_hypothetical_protein,jerky_protein                                                                                                                                                                                                                                                                                                                                                                                                                                                                                                                                                                                                                                                           |
| FAM2219 | 0                           | 0                                 | 0                    | 18              | 0                 | 0                   | hypothetical_protein,conserved_hypothetical_protein                                                                                                                                                                                                                                                                                                                                                                                                                                                                                                                                                                                                                                                                         |
| FAM2218 | 0                           | 0                                 | 0                    | 17              | 0                 | 1                   | conserved_hypothetical_protein,Pao_retrotransposon_peptidase_superfamily,zinc_knuckle_protein,Gag_Pol_polyprotein                                                                                                                                                                                                                                                                                                                                                                                                                                                                                                                                                                                                           |
| FAM2502 | 0                           | 0                                 | 0                    | 16              | 0                 | 1                   | hypothetical_protein,conserved_hypothetical_protein                                                                                                                                                                                                                                                                                                                                                                                                                                                                                                                                                                                                                                                                         |
| FAM2217 | 0                           | 0                                 | 0                    | 15              | 0                 | 3                   | transposase,conserved_hypothetical_protein,Putative_tick_transposon,Pfam-B_19879-domain_containing_protein,hypothetical_protein,reverse_transcriptase                                                                                                                                                                                                                                                                                                                                                                                                                                                                                                                                                                       |
| FAM3202 | 0                           | 0                                 | 0                    | 15              | 0                 | 0                   | tigger_transposable_element_derived_protein                                                                                                                                                                                                                                                                                                                                                                                                                                                                                                                                                                                                                                                                                 |
| FAM8    | 269                         | 3                                 | 0                    | 14              | 0                 | 1                   | FLYWCH_and_MULE_and_Pfam-B_516-domain_containing_protein,Pfam-B_516_and_FLYWCH_and_MULE-domain_containing_protein,MULE_and_FLYWCH_and_Pfam-B_516- domain_containing_protein,FLYWCH_and_Pfam-B_516_and_MULE-domain_containing_protein                                                                                                                                                                                                                                                                                                                                                                                                                                                                                        |
| FAM3605 | 0                           | 0                                 | 0                    | 14              | 0                 | 0                   | conserved_hypothetical_protein,Pfam-B_516-domain_containing_protein,Pfam-B_516_and_MULE_and_FLYWCH-domain_containing_protein                                                                                                                                                                                                                                                                                                                                                                                                                                                                                                                                                                                                |
| FAM3607 | 0                           | 0                                 | 0                    | 14              | 0                 | 0                   | conserved_hypothetical_protein,tigger_transposable_element_derived_protein,jerky_protein,hypothetical_protein                                                                                                                                                                                                                                                                                                                                                                                                                                                                                                                                                                                                               |
| FAM3608 | 0                           | 0                                 | 0                    | 14              | 0                 | 0                   | hypothetical_protein,conserved_hypothetical_protein,Pfam-B_19879-domain_containing_protein                                                                                                                                                                                                                                                                                                                                                                                                                                                                                                                                                                                                                                  |

|         |    |   |   |    |   |   |                                                                                                                                                                                                                                                                                                                                                                                         |
|---------|----|---|---|----|---|---|-----------------------------------------------------------------------------------------------------------------------------------------------------------------------------------------------------------------------------------------------------------------------------------------------------------------------------------------------------------------------------------------|
| FAM3653 | 0  | 0 | 0 | 14 | 0 | 0 | hypothetical_protein                                                                                                                                                                                                                                                                                                                                                                    |
| FAM4089 | 0  | 0 | 0 | 13 | 0 | 0 | ankyrin_2,3:unc44,DUF1758-domain_containing_protein,polyprotein,conserved_hypothetical_protein,Peptidase_A17_and_DUF667-domain_containing_protein,Pfam-B_198                                                                                                                                                                                                                            |
| FAM4090 | 0  | 0 | 0 | 13 | 0 | 0 | hypothetical_protein,conserved_hypothetical_protein,Pfam-B_13107-domain_containing_protein,Pfam-B_516-domain_containing_protein,FLYWCH-domain_containing_pro                                                                                                                                                                                                                            |
| FAM4659 | 0  | 0 | 0 | 12 | 0 | 0 | conserved_hypothetical_protein,hypothetical_protein                                                                                                                                                                                                                                                                                                                                     |
| FAM4660 | 0  | 0 | 0 | 12 | 0 | 0 | Putative_integrase_core_domain_protein,conserved_hypothetical_protein,zf-CCHC-domain_containing_protein,zf-CCHC_and_Pfam-B_10329-domain_containing_protein                                                                                                                                                                                                                              |
| FAM5306 | 0  | 0 | 0 | 11 | 0 | 0 | hypothetical_protein,Pfam-B_10329-domain_containing_protein,Pfam-B_10329_and_zf-CCHC-domain_containing_protein,zf-CCHC_and_Pfam-B_10329-domain_containir                                                                                                                                                                                                                                |
| FAM5309 | 0  | 0 | 0 | 11 | 0 | 0 | hypothetical_protein,conserved_hypothetical_protein                                                                                                                                                                                                                                                                                                                                     |
| FAM6036 | 0  | 0 | 0 | 10 | 0 | 0 | hypothetical_protein,conserved_hypothetical_protein                                                                                                                                                                                                                                                                                                                                     |
| FAM6037 | 0  | 0 | 0 | 10 | 0 | 0 | hypothetical_protein,conserved_hypothetical_protein,peripheral_plasma_membrane_protein_CASK                                                                                                                                                                                                                                                                                             |
| FAM6044 | 0  | 0 | 0 | 10 | 0 | 0 | hypothetical_protein                                                                                                                                                                                                                                                                                                                                                                    |
| FAM36   | 91 | 1 | 1 | 9  | 1 | 5 | conserved_hypothetical_protein,DUF4371-domain_containing_protein                                                                                                                                                                                                                                                                                                                        |
| FAM5304 | 0  | 0 | 0 | 9  | 0 | 2 | ankyrin_2,3:unc44,conserved_hypothetical_protein,Pfam-B_19879-domain_containing_protein,reverse_transcriptase                                                                                                                                                                                                                                                                           |
| FAM78   | 61 | 1 | 1 | 8  | 2 | 7 | protein_tag_76,PAZ_and_Piwi-domain_containing_protein                                                                                                                                                                                                                                                                                                                                   |
| FAM1503 | 13 | 0 | 0 | 8  | 0 | 1 | pol_polyprotein,DUF4219_and_Pfam-B_7383_and_zf-CCHC_and_Pfam-B_4137_and_rve_and_Pfam-B_10563_and_UBN2_2_and_RVT_2-domain_containing_protein,hypothet<br>B_4137_and_zf-CCHC_and_Pfam-B_10563_and_UBN2-domain_containing_protein,zf-CCHC_and_UBN2-domain_containing_protein,Pfam-B_7383_and_zf-CCHC_and_gag_p<br>B_7383_and_Pfam-B_10329_and_zf-CCHC_and_UBN2_2-domain_containing_protein |
| FAM5302 | 0  | 0 | 0 | 8  | 0 | 3 | conserved_hypothetical_protein,DDE_Tnp_IS1595_and_Mononeg_RNA_pol-domain_containing_protein,hypothetical_protein,Pfam-B_19346-domain_containing_protein                                                                                                                                                                                                                                 |
| FAM6039 | 2  | 0 | 0 | 8  | 0 | 0 | Pfam-B_310-domain_containing_protein,something_about_silencing_protein_10                                                                                                                                                                                                                                                                                                               |
| FAM6042 | 1  | 0 | 0 | 8  | 0 | 1 | conserved_hypothetical_protein,zf-C2H2_4_and_zf-C2H2-domain_containing_protein,zinc_finger_protein,zinc_finger_protein_569,zf-C2H2_4_and_zf-C2H2_and_zf-H2C2<br>C2H2-domain_containing_protein                                                                                                                                                                                          |
| FAM7543 | 0  | 0 | 0 | 8  | 0 | 0 | conserved_hypothetical_protein                                                                                                                                                                                                                                                                                                                                                          |
| FAM7544 | 0  | 0 | 0 | 8  | 0 | 0 | Pfam-B_10329-domain_containing_protein,RETRtransposon_family_member                                                                                                                                                                                                                                                                                                                     |
| FAM7546 | 0  | 0 | 0 | 8  | 0 | 0 | Dimer_Tnp_hAT-domain_containing_protein,conserved_hypothetical_protein                                                                                                                                                                                                                                                                                                                  |
| FAM7700 | 0  | 0 | 0 | 8  | 0 | 0 | hypothetical_protein                                                                                                                                                                                                                                                                                                                                                                    |
| FAM2795 | 5  | 0 | 0 | 7  | 0 | 4 | conserved_hypothetical_protein,zf-CCHC_and_RVT_3_and_rve-domain_containing_protein,zf-CCHC_and_RVT_3_and_Pfam-B_695_and_rve-domain_containing_protein,CRA                                                                                                                                                                                                                               |
| FAM4661 | 0  | 0 | 0 | 7  | 0 | 5 | hypothetical_protein,dsrcm-domain_containing_protein                                                                                                                                                                                                                                                                                                                                    |
| FAM6040 | 2  | 0 | 0 | 7  | 0 | 1 | gag_pre-integrns_and_rve_and_Pfam-B_10563_and_zf-CCHC_and_Pfam-B_11267-domain_containing_protein,zf-CCHC_and_Pfam-B_11267_and_UBN2-<br>domain_containing_protein,putative_pol_polyprotein;_copia_type_polyprotein_putative,retrovirus_Pol_polyprotein,polyprotein,copia_type_polyprotein,reverse_transcriptase_                                                                         |
| FAM7548 | 0  | 0 | 0 | 7  | 0 | 1 | actin_protein_6A_like,Actin-domain_containing_protein                                                                                                                                                                                                                                                                                                                                   |
| FAM8361 | 0  | 0 | 0 | 7  | 0 | 0 | conserved_hypothetical_protein,zf-CCHC-domain_containing_protein                                                                                                                                                                                                                                                                                                                        |
| FAM8364 | 0  | 0 | 0 | 7  | 0 | 0 | protein_crumbs,neurogenic_locus_notch_protein_2,Uncharacterized_transposase_protein,crumbs_1,neurogenic_locus_notch_protein                                                                                                                                                                                                                                                             |
| FAM8365 | 0  | 0 | 0 | 7  | 0 | 0 | conserved_hypothetical_protein,zinc_finger_protein_646,hypothetical_protein                                                                                                                                                                                                                                                                                                             |
| FAM8369 | 0  | 0 | 0 | 7  | 0 | 0 | conserved_hypothetical_protein,Pfam-B_516-domain_containing_protein                                                                                                                                                                                                                                                                                                                     |
| FAM34   | 4  | 6 | 4 | 6  | 8 | 6 | multidrug_resistance_associated_protein_4,multidrug_Resistance_protein_family_member,multidrug_resistance_associated_protein_7,multidrug_resistanceprotein_k;_multic                                                                                                                                                                                                                    |
| FAM131  | 52 | 0 | 0 | 6  | 0 | 5 | neurogenic_locus_notch_protein_2,hypothetical_protein,Neurogenic_locus_protein_delta,Putative_thrombospondin_type_1_domain_protein,EGF-domain_containing_protein                                                                                                                                                                                                                        |
| FAM234  | 4  | 2 | 1 | 6  | 5 | 5 | glyco_protein_3_alpha_L_fucosyltransferase_A,glycoprotein_3_alpha_L_fucosyltransferase,Alpha_(1,3)_fucosyltransferase_C,glycoprotein_3_alpha_L_fucosyltransferase                                                                                                                                                                                                                       |

|         |   |   |   |   |   |    |                                                                                                                                                                                                                                                                                                                                                                                             |
|---------|---|---|---|---|---|----|---------------------------------------------------------------------------------------------------------------------------------------------------------------------------------------------------------------------------------------------------------------------------------------------------------------------------------------------------------------------------------------------|
| FAM2794 | 0 | 0 | 0 | 6 | 0 | 10 | Motile_Sperm_and_Pfam-B_11622-domain_containing_protein,Motile_Sperm-domain_containing_protein,Pfam-B_4364_and_Motile_Sperm-domain_containing_protein                                                                                                                                                                                                                                       |
| FAM5503 | 1 | 1 | 0 | 6 | 0 | 1  | zf-CCHC_and_Pfam-B_2545_and_Asp_protease_2_and_Pfam-B_2707_and_rve-domain_containing_protein,Gap_Pol_polyprotein,rve_and_Pfam-B_10563_and_zf-CCHC_and_domain_containing_protein,rve_and_zf-CCHC_and_Pfam-B_10329_and_RVT_1_and_Pfam-B_2707-domain_containing_protein,zf-CCHC_and_Asp_protease_2_and_Pfam-B_CCHC_and_Pfam-B_2545_and_RVP_and_RVT_1_and_Pfam-B_2707-domain_containing_protein |

**Supplementary Table 3g: Largest gene families in *Trichuris trichiura*, sorted by *T. trichiura* copy number.**

| family  | <i>Trichinella spiralis</i> | <i>Bursaphelenchus xylophilus</i> | <i>Brugia malayi</i> | <i>T. muris</i> | <i>C. elegans</i> | <i>T. trichiura</i> | annotation                                                                                                                                                                                                                                                                                                                                                                                                                                                                                                                                                                                                                                                                           |
|---------|-----------------------------|-----------------------------------|----------------------|-----------------|-------------------|---------------------|--------------------------------------------------------------------------------------------------------------------------------------------------------------------------------------------------------------------------------------------------------------------------------------------------------------------------------------------------------------------------------------------------------------------------------------------------------------------------------------------------------------------------------------------------------------------------------------------------------------------------------------------------------------------------------------|
| FAM1027 | 1                           | 0                                 | 0                    | 4               | 0                 | 21                  | hypothetical_protein,Pfam-B_6031_and_Pfam-B_2655-domain_containing_protein                                                                                                                                                                                                                                                                                                                                                                                                                                                                                                                                                                                                           |
| FAM2    | 86                          | 2                                 | 793                  | 24              | 1                 | 14                  | DUF1759_and_DUF1758-domain_containing_protein,Peptidase_A17_and_rve_and_DUF1759_and_DUF1758-domain_containing_protein,Pao_retrotransposon_peptidase_su_domain_containing_protein,rve_and_DUF1758_and_RVT_1_and_Peptidase_A17-domain_containing_protein,DUF1758_and_RVT_1_and_Peptidase_A17-domain_containing_protein,RVT_1_and_Peptidase_A17_and_DUF1758-domain_containing_protein,Peptidase_A17_and_DUF1759_and_DUF1758-domain_containing_protein,Tas_retrotransposon_peptidase_A16_superfamily,rve_and_DUF1758_and_Peptidase_A17-domain_containing_protein,DUF1759_and_DUF1758-domain_containing_protein,DUF1759_and_DUF1758_and_RVT_1_and_Peptidase_A17-domain_containing_protein |
| FAM4091 | 0                           | 0                                 | 0                    | 0               | 0                 | 13                  | NONE                                                                                                                                                                                                                                                                                                                                                                                                                                                                                                                                                                                                                                                                                 |
| FAM24   | 3                           | 1                                 | 17                   | 5               | 7                 | 11                  | proteinase_inhibitor_I4_serpin,Serine_proteinase_inhibitor,serine_proteinase_inhibitor                                                                                                                                                                                                                                                                                                                                                                                                                                                                                                                                                                                               |
| FAM3206 | 0                           | 0                                 | 1                    | 0               | 1                 | 11                  | NONE                                                                                                                                                                                                                                                                                                                                                                                                                                                                                                                                                                                                                                                                                 |
| FAM4665 | 0                           | 0                                 | 0                    | 1               | 0                 | 11                  | neurogenic_locus_notch_protein_2                                                                                                                                                                                                                                                                                                                                                                                                                                                                                                                                                                                                                                                     |
| FAM4666 | 0                           | 0                                 | 1                    | 0               | 0                 | 11                  | NONE                                                                                                                                                                                                                                                                                                                                                                                                                                                                                                                                                                                                                                                                                 |
| FAM5313 | 0                           | 0                                 | 0                    | 0               | 0                 | 11                  | NONE                                                                                                                                                                                                                                                                                                                                                                                                                                                                                                                                                                                                                                                                                 |
| FAM29   | 9                           | 0                                 | 107                  | 0               | 0                 | 10                  | NONE                                                                                                                                                                                                                                                                                                                                                                                                                                                                                                                                                                                                                                                                                 |
| FAM587  | 18                          | 0                                 | 4                    | 0               | 0                 | 10                  | NONE                                                                                                                                                                                                                                                                                                                                                                                                                                                                                                                                                                                                                                                                                 |
| FAM2794 | 0                           | 0                                 | 0                    | 6               | 0                 | 10                  | Motile_Sperm_and_Pfam-B_11622-domain_containing_protein,Motile_Sperm-domain_containing_protein,Pfam-B_4364_and_Motile_Sperm-domain_containing_protein                                                                                                                                                                                                                                                                                                                                                                                                                                                                                                                                |
| FAM6050 | 0                           | 0                                 | 0                    | 0               | 0                 | 10                  | NONE                                                                                                                                                                                                                                                                                                                                                                                                                                                                                                                                                                                                                                                                                 |
| FAM126  | 0                           | 4                                 | 2                    | 4               | 15                | 9                   | histone_type;_histone_hc,Histone-domain_containing_protein                                                                                                                                                                                                                                                                                                                                                                                                                                                                                                                                                                                                                           |
| FAM5305 | 0                           | 0                                 | 0                    | 3               | 0                 | 8                   | histone_h3                                                                                                                                                                                                                                                                                                                                                                                                                                                                                                                                                                                                                                                                           |
| FAM78   | 61                          | 1                                 | 1                    | 8               | 2                 | 7                   | protein_tag_76,PAZ_and_Piwi-domain_containing_protein                                                                                                                                                                                                                                                                                                                                                                                                                                                                                                                                                                                                                                |
| FAM2393 | 1                           | 1                                 | 1                    | 4               | 1                 | 7                   | DUF229-domain_containing_protein                                                                                                                                                                                                                                                                                                                                                                                                                                                                                                                                                                                                                                                     |
| FAM5303 | 1                           | 0                                 | 0                    | 3               | 0                 | 7                   | Trypsin-domain_containing_protein                                                                                                                                                                                                                                                                                                                                                                                                                                                                                                                                                                                                                                                    |
| FAM5307 | 0                           | 0                                 | 0                    | 4               | 0                 | 7                   | hypothetical_protein                                                                                                                                                                                                                                                                                                                                                                                                                                                                                                                                                                                                                                                                 |
| FAM8399 | 0                           | 0                                 | 0                    | 0               | 0                 | 7                   | NONE                                                                                                                                                                                                                                                                                                                                                                                                                                                                                                                                                                                                                                                                                 |
| FAM34   | 4                           | 6                                 | 4                    | 6               | 8                 | 6                   | multidrug_resistance_associated_protein_4,multidrug_Resistance_protein_family_member,multidrug_resistance_associated_protein_7,multidrug_resistanceprotein_k;_mult                                                                                                                                                                                                                                                                                                                                                                                                                                                                                                                   |
| FAM947  | 20                          | 0                                 | 0                    | 1               | 0                 | 6                   | Pfam-B_10329-domain_containing_protein                                                                                                                                                                                                                                                                                                                                                                                                                                                                                                                                                                                                                                               |
| FAM3750 | 1                           | 2                                 | 0                    | 1               | 3                 | 6                   | onchocystatin                                                                                                                                                                                                                                                                                                                                                                                                                                                                                                                                                                                                                                                                        |
| FAM6828 | 1                           | 0                                 | 0                    | 2               | 0                 | 6                   | Kringle-domain_containing_protein,coagulin_factor_II                                                                                                                                                                                                                                                                                                                                                                                                                                                                                                                                                                                                                                 |

|          |    |   |   |   |    |   |                                                                                                                                                                   |
|----------|----|---|---|---|----|---|-------------------------------------------------------------------------------------------------------------------------------------------------------------------|
| FAM8398  | 0  | 0 | 0 | 1 | 0  | 6 | hypothetical_protein                                                                                                                                              |
| FAM8401  | 1  | 0 | 0 | 0 | 0  | 6 | NONE                                                                                                                                                              |
| FAM9342  | 0  | 0 | 0 | 0 | 0  | 6 | NONE                                                                                                                                                              |
| FAM9345  | 0  | 0 | 0 | 0 | 0  | 6 | NONE                                                                                                                                                              |
| FAM9394  | 0  | 0 | 0 | 0 | 0  | 6 | NONE                                                                                                                                                              |
| FAM36    | 91 | 1 | 1 | 9 | 1  | 5 | conserved_hypothetical_protein,DUF4371-domain_containing_protein                                                                                                  |
| FAM67    | 0  | 8 | 3 | 0 | 13 | 5 | NONE                                                                                                                                                              |
| FAM71    | 1  | 5 | 5 | 4 | 17 | 5 | histone_H2A,histone_H2A_type_2_B                                                                                                                                  |
| FAM131   | 52 | 0 | 0 | 6 | 0  | 5 | hypothetical_protein,Neurogenic_locus_protein_delta,Putative_thrombospondin_type_1_domain_protein,neurogenic_locus_notch_protein_2,EGF-domain_containing_protein  |
| FAM174   | 5  | 4 | 1 | 5 | 3  | 5 | amino_acid_permease,protein_kcc,solute_carrier_family_12                                                                                                          |
| FAM212   | 3  | 3 | 1 | 5 | 2  | 5 | ABC_tran_domain_containing_protein,ABC_transporter,_ATP_binding_protein,ATP_binding_cassette_sub_family_A                                                         |
| FAM234   | 4  | 2 | 1 | 6 | 5  | 5 | glyco_protein_3_alpha_L_fucosyltransferase_A,glycoprotein_3_alpha_L_fucosyltransferase,Alpha_(1,3)_fucosyltransferase_C,glycoprotein_3_alpha_L_fucosyltransferase |
| FAM367   | 4  | 2 | 2 | 5 | 1  | 5 | solute_carrier_family_12                                                                                                                                          |
| FAM1228  | 8  | 1 | 1 | 5 | 1  | 5 | Pfam-B_310-domain_containing_protein,Pfam-B_2707_and_rve_and_Ribosomal_L50_and_RVT_1-domain_containing_protein,subfamily_M3A_non_peptidase_ue_,conserve           |
| FAM1345  | 14 | 0 | 0 | 4 | 0  | 5 | Deoxyribonuclease                                                                                                                                                 |
| FAM1642  | 14 | 0 | 0 | 2 | 0  | 5 | hypothetical_protein                                                                                                                                              |
| FAM4279  | 0  | 2 | 0 | 2 | 3  | 5 | UDPGT-domain_containing_protein                                                                                                                                   |
| FAM4661  | 0  | 0 | 0 | 7 | 0  | 5 | hypothetical_protein,dsrcm-domain_containing_protein                                                                                                              |
| FAM6830  | 0  | 0 | 0 | 4 | 0  | 5 | transmembrane_serine_protease_8,BTB_and_Trypsin-domain_containing_protein,Trypsin-domain_containing_protein                                                       |
| FAM9344  | 0  | 0 | 0 | 1 | 0  | 5 | Pfam-B_9093-domain_containing_protein                                                                                                                             |
| FAM10600 | 0  | 0 | 0 | 0 | 0  | 5 | NONE                                                                                                                                                              |
| FAM10604 | 0  | 0 | 0 | 0 | 0  | 5 | NONE                                                                                                                                                              |
| FAM10605 | 0  | 0 | 0 | 0 | 0  | 5 | NONE                                                                                                                                                              |
| FAM10636 | 0  | 0 | 0 | 0 | 0  | 5 | NONE                                                                                                                                                              |
| FAM10658 | 0  | 0 | 0 | 0 | 0  | 5 | NONE                                                                                                                                                              |
| FAM10673 | 0  | 0 | 0 | 0 | 0  | 5 | NONE                                                                                                                                                              |
| FAM10674 | 0  | 0 | 0 | 0 | 0  | 5 | NONE                                                                                                                                                              |

**Supplementary Table 3h: Gene families showing significant changes (z-score > 1.96) in copy number between *Trichuris* species and other nematodes, sorted by total copy number across nematode species.**

| family | <i>Trichinella spiralis</i> | <i>Bursaphelenchus xylophilus</i> | <i>Brugia malayi</i> | <i>T. muris</i> | <i>C. elegans</i> | <i>T. trichiura</i> | z-score | annotation                        |
|--------|-----------------------------|-----------------------------------|----------------------|-----------------|-------------------|---------------------|---------|-----------------------------------|
| FAM170 | 4                           | 7                                 | 8                    | 2               | 9                 | 2                   | 2.167   | alpha_tubulin,tubulin_alpha_chain |

|         |   |   |   |    |   |    |       |                                                                                                                                                                                  |
|---------|---|---|---|----|---|----|-------|----------------------------------------------------------------------------------------------------------------------------------------------------------------------------------|
| FAM1027 | 1 | 0 | 0 | 4  | 0 | 21 | 1.965 | hypothetical_protein,Pfam-B_6031_and_Pfam-B_2655-domain_containing_protein                                                                                                       |
| FAM212  | 3 | 3 | 1 | 5  | 2 | 5  | 2.289 | ABC_tran_domain_containing_protein,ABC_transporter,_ATP_binding_protein,ATP_binding_cassette_sub_family_A                                                                        |
| FAM367  | 4 | 2 | 2 | 5  | 1 | 5  | 2.129 | solute_carrier_family_12                                                                                                                                                         |
| FAM2217 | 0 | 0 | 0 | 15 | 0 | 3  | 2.000 | transposase,hypothetical_protein,conserved_hypothetical_protein,Putative_tick_transposon,reverse_transcriptase,Pfam-B_19879-domain_containing_protein                            |
| FAM150  | 3 | 4 | 3 | 2  | 3 | 2  | 2.214 | protein_unc_g;_protein_unc_f;_protein_unc_d;_protein_unc_b;_protein_unc_a,Muscle_M_line_assembly_protein_unc_89                                                                  |
| FAM2794 | 0 | 0 | 0 | 6  | 0 | 10 | 2.469 | Motile_Sperm_and_Pfam-B_11622-domain_containing_protein,Motile_Sperm-domain_containing_protein,Pfam-B_4364_and_Motile_Sperm-domain_containing_protein                            |
| FAM2393 | 1 | 1 | 1 | 4  | 1 | 7  | 2.390 | DUF229-domain_containing_protein                                                                                                                                                 |
| FAM987  | 2 | 2 | 1 | 3  | 2 | 3  | 2.214 | LRR_1_and_LRR_8_and_LRRNT_and_I-set_and_fn3-domain_containing_protein,LRR_6_and_LRR_8_and_Pfam-B_12548-domain_containing_protein,LRR_8_and_Pfam-B_7182-domain_containing_protein |
| FAM4661 | 0 | 0 | 0 | 7  | 0 | 5  | 2.530 | hypothetical_protein,dsrcm-domain_containing_protein                                                                                                                             |
| FAM959  | 3 | 2 | 3 | 1  | 2 | 1  | 2.236 | U5_small_nuclear_ribonucleoprotein_40_kDa                                                                                                                                        |
| FAM1856 | 2 | 3 | 3 | 1  | 2 | 1  | 2.236 | diphthine_synthase                                                                                                                                                               |
| FAM4224 | 2 | 3 | 2 | 1  | 3 | 1  | 2.236 | animal_hem_peroxidase_family_protein;_animal_haem_peroxidase_family_protein                                                                                                      |
| FAM5307 | 0 | 0 | 0 | 4  | 0 | 7  | 2.449 | hypothetical_protein                                                                                                                                                             |
| FAM1043 | 3 | 2 | 4 | 0  | 2 | 0  | 2.289 | NONE                                                                                                                                                                             |
| FAM5303 | 1 | 0 | 0 | 3  | 0 | 7  | 2.273 | Trypsin-domain_containing_protein                                                                                                                                                |
| FAM5302 | 0 | 0 | 0 | 8  | 0 | 3  | 2.256 | hypothetical_protein,conserved_hypothetical_protein,Pfam-B_19346-domain_containing_protein,DDE_Tnp_IS1595_and_Mononeg_RNA_pol-domain_containing_protein                          |
| FAM5305 | 0 | 0 | 0 | 3  | 0 | 8  | 2.256 | histone_h3                                                                                                                                                                       |
| FAM585  | 2 | 2 | 3 | 1  | 2 | 1  | 2.214 | mitochondrial_ribosomal_protein_L48                                                                                                                                              |
| FAM2532 | 2 | 2 | 3 | 1  | 2 | 1  | 2.214 | phospholipase,_patatin_family                                                                                                                                                    |
| FAM3089 | 3 | 2 | 2 | 1  | 2 | 1  | 2.214 | sodium_independent_organic_anion_transporter                                                                                                                                     |
| FAM5304 | 0 | 0 | 0 | 9  | 0 | 2  | 2.037 | ankyrin_2,3:unc44,conserved_hypothetical_protein,reverse_transcriptase,Pfam-B_19879-domain_containing_protein                                                                    |
| FAM464  | 2 | 2 | 2 | 1  | 2 | 1  | 2.582 | 40S_ribosomal_protein_S10                                                                                                                                                        |
| FAM1182 | 2 | 2 | 2 | 1  | 2 | 1  | 2.582 | zinc_transporter_2                                                                                                                                                               |
| FAM6043 | 1 | 0 | 0 | 6  | 1 | 2  | 2.073 | zf-H2C2_2-domain_containing_protein                                                                                                                                              |
| FAM5308 | 2 | 1 | 1 | 3  | 1 | 2  | 2.041 | conserved_hypothetical_protein,Ribosomal_L9_N-domain_containing_protein,Pfam-B_13521-domain_containing_protein                                                                   |
| FAM6830 | 0 | 0 | 0 | 4  | 0 | 5  | 2.558 | Trypsin-domain_containing_protein,transmembrane_serine_protease_8,BTB_and_Trypsin-domain_containing_protein                                                                      |
| FAM930  | 1 | 1 | 1 | 2  | 1 | 3  | 2.390 | transcription_initiation_factor_TFIID_subunit,TFIID-31kDa-domain_containing_protein                                                                                              |
| FAM6827 | 1 | 1 | 1 | 3  | 1 | 2  | 2.390 | prestin,solute_carrier_family_26                                                                                                                                                 |
| FAM3545 | 0 | 1 | 1 | 2  | 1 | 4  | 2.176 | DSPc-domain_containing_protein,RNA:RNP_complex_1_interacting_phosphatase                                                                                                         |
| FAM6828 | 1 | 0 | 0 | 2  | 0 | 6  | 2.132 | Kringle-domain_containing_protein,coagulin_factor_II                                                                                                                             |
| FAM850  | 1 | 1 | 1 | 2  | 1 | 2  | 2.582 | protein_grainyhead                                                                                                                                                               |

|         |   |   |   |   |   |   |       |                                                                                                                       |
|---------|---|---|---|---|---|---|-------|-----------------------------------------------------------------------------------------------------------------------|
| FAM1306 | 1 | 1 | 1 | 2 | 1 | 2 | 2.582 | Orai-1-domain_containing_protein,calcium_release_activated_calcium_channel                                            |
| FAM2615 | 1 | 1 | 1 | 2 | 1 | 2 | 2.582 | AP_3_complex_subunit_beta_2                                                                                           |
| FAM2678 | 1 | 1 | 1 | 2 | 1 | 2 | 2.582 | tRNA-synt_His_and_HCTP_anticodon2-domain_containing_protein,RWD_and_Pkinase_and_Pfam-B_6749-domain_containing_protein |
| FAM2734 | 1 | 1 | 1 | 2 | 1 | 2 | 2.582 | HT004_protein                                                                                                         |
| FAM2787 | 1 | 1 | 1 | 2 | 1 | 2 | 2.582 | phosphoglucomutase                                                                                                    |
| FAM3451 | 1 | 1 | 1 | 2 | 1 | 2 | 2.582 | dentin_matrix_protein_4,Pfam-B_12616_and_DUF1193-domain_containing_protein                                            |
| FAM4423 | 1 | 1 | 1 | 2 | 1 | 2 | 2.582 | histone_H2A,histone_H2A_variant                                                                                       |
| FAM5071 | 1 | 1 | 1 | 2 | 1 | 2 | 2.582 | plasma_alpha_L_fucosidase,alpha_L_fucosidase                                                                          |
| FAM5126 | 1 | 1 | 1 | 2 | 1 | 2 | 2.582 | 26S_proteasome_regulatory_complex_ATPase_RPT2,26S_protease_regulatory_subunit_4                                       |
| FAM5296 | 1 | 1 | 1 | 2 | 1 | 2 | 2.582 | 1,4_alpha_glucan_branching_enzyme                                                                                     |
| FAM7547 | 0 | 0 | 0 | 6 | 0 | 2 | 2.202 | WAP_domain_containing_protein,_SLPI-like                                                                              |
| FAM520  | 2 | 2 | 2 | 1 | 1 | 0 | 2.041 | racgtpase_activating_protein                                                                                          |
| FAM2820 | 2 | 2 | 2 | 1 | 1 | 0 | 2.041 | Histone_lysine_N_methyltransferase_pr_set7                                                                            |
| FAM8362 | 0 | 0 | 0 | 4 | 0 | 3 | 2.543 | hypothetical_protein                                                                                                  |
| FAM8373 | 0 | 0 | 0 | 3 | 0 | 4 | 2.543 | Pfam-B_9093-domain_containing_protein                                                                                 |
| FAM3245 | 2 | 2 | 2 | 0 | 1 | 0 | 2.373 | NONE                                                                                                                  |
| FAM3134 | 1 | 1 | 0 | 2 | 1 | 2 | 2.214 | signal_peptidase_complex_catalytic_subunit,Signal_peptidase_complex_catalytic_subunit                                 |
| FAM3865 | 0 | 1 | 1 | 2 | 1 | 2 | 2.214 | RNA_polymerase_II_associated_factor_1                                                                                 |

**Supplementary Table 3i: Gene families showing significant changes (z-score > 1.96) in copy number between *Trichuris muris* and *T. trichiura*, sorted by total copy number in *Trichuris*.**

| family  | <i>Trichinella spiralis</i> | <i>Bursaphelenchus xylophilus</i> | <i>Brugia malayi</i> | <i>T. muris</i> | <i>C. elegans</i> | <i>T. trichiura</i> | z-score | annotation                                                                                                                                                                                                                                                     |
|---------|-----------------------------|-----------------------------------|----------------------|-----------------|-------------------|---------------------|---------|----------------------------------------------------------------------------------------------------------------------------------------------------------------------------------------------------------------------------------------------------------------|
| FAM217  | 0                           | 1                                 | 1                    | 47              | 1                 | 0                   | 2.480   | conserved_hypothetical_protein,hypothetical_protein                                                                                                                                                                                                            |
| FAM806  | 0                           | 0                                 | 0                    | 29              | 0                 | 0                   | 2.449   | hypothetical_protein,Pfam-B_7026-domain_containing_protein,Pfam-B_19346-domain_containing_protein,Pfam-B_7026_and_Pfam-B_16276-domain_containing_Pfam-B_19346_and_Pfam-B_7026-domain_containing_protein,Pfam-B_7026_and_Pfam-B_19346-domain_containing_protein |
| FAM1124 | 0                           | 0                                 | 0                    | 25              | 0                 | 0                   | 2.449   | conserved_hypothetical_protein,hypothetical_protein                                                                                                                                                                                                            |
| FAM1027 | 1                           | 0                                 | 0                    | 4               | 0                 | 21                  | 2.046   | Pfam-B_6031_and_Pfam-B_2655-domain_containing_protein,hypothetical_protein                                                                                                                                                                                     |
| FAM1344 | 0                           | 0                                 | 0                    | 23              | 0                 | 0                   | 2.449   | RNA_dependent_RNA_polymerase,Mononeg_RNA_pol-domain_containing_protein,large_protein,hypothetical_protein,polymerase                                                                                                                                           |
| FAM1988 | 0                           | 0                                 | 0                    | 19              | 0                 | 0                   | 2.449   | conserved_hypothetical_protein,tigger_transposable_element_derived_protein,hypothetical_protein                                                                                                                                                                |
| FAM1495 | 0                           | 1                                 | 0                    | 18              | 0                 | 0                   | 2.473   | hypothetical_protein,conserved_hypothetical_protein,jerky_protein                                                                                                                                                                                              |
| FAM2219 | 0                           | 0                                 | 0                    | 18              | 0                 | 0                   | 2.449   | conserved_hypothetical_protein,hypothetical_protein                                                                                                                                                                                                            |
| FAM2218 | 0                           | 0                                 | 0                    | 17              | 0                 | 1                   | 2.329   | conserved_hypothetical_protein,Pao_retrotransposon_peptidase_superfamily,zinc_knuckle_protein,Gag_Pol_polyprotein                                                                                                                                              |
| FAM2217 | 0                           | 0                                 | 0                    | 15              | 0                 | 3                   | 2.000   | transposase,conserved_hypothetical_protein,Putative_tick_transposon,Pfam-B_19879-domain_containing_protein,hypothetical_protein,reverse_transcriptase                                                                                                          |



|         |   |   |   |    |   |    |       |                                                                                                                                                                                                                                                                                                                   |
|---------|---|---|---|----|---|----|-------|-------------------------------------------------------------------------------------------------------------------------------------------------------------------------------------------------------------------------------------------------------------------------------------------------------------------|
| FAM2502 | 0 | 0 | 0 | 16 | 0 | 1  | 2.321 | hypothetical_protein, conserved_hypothetical_protein                                                                                                                                                                                                                                                              |
| FAM3202 | 0 | 0 | 0 | 15 | 0 | 0  | 2.449 | tigger_transposable_element_derived_protein                                                                                                                                                                                                                                                                       |
| FAM3605 | 0 | 0 | 0 | 14 | 0 | 0  | 2.449 | conserved_hypothetical_protein, Pfam-B_516-domain_containing_protein, Pfam-B_516_and_MULE_and_FLYWCH-domain_containing_protein                                                                                                                                                                                    |
| FAM3607 | 0 | 0 | 0 | 14 | 0 | 0  | 2.449 | conserved_hypothetical_protein, tigger_transposable_element_derived_protein, jerky_protein, hypothetical_protein                                                                                                                                                                                                  |
| FAM3608 | 0 | 0 | 0 | 14 | 0 | 0  | 2.449 | hypothetical_protein, conserved_hypothetical_protein, Pfam-B_19879-domain_containing_protein                                                                                                                                                                                                                      |
| FAM3653 | 0 | 0 | 0 | 14 | 0 | 0  | 2.449 | hypothetical_protein                                                                                                                                                                                                                                                                                              |
| FAM4089 | 0 | 0 | 0 | 13 | 0 | 0  | 2.449 | conserved_hypothetical_protein, Peptidase_A17_and_DUF667-domain_containing_protein, Pfam-B_19879-domain_containing_protein, ankyrin_2,3:unc44, DUF1758-domain_containing_protein, polyprotein                                                                                                                     |
| FAM4090 | 0 | 0 | 0 | 13 | 0 | 0  | 2.449 | conserved_hypothetical_protein, Pfam-B_13107-domain_containing_protein, Pfam-B_516-domain_containing_protein, hypothetical_protein, FLYWCH-domain_containing_protein                                                                                                                                              |
| FAM4091 | 0 | 0 | 0 | 0  | 0 | 13 | 2.449 | NONE                                                                                                                                                                                                                                                                                                              |
| FAM4659 | 0 | 0 | 0 | 12 | 0 | 0  | 2.449 | conserved_hypothetical_protein, hypothetical_protein                                                                                                                                                                                                                                                              |
| FAM4660 | 0 | 0 | 0 | 12 | 0 | 0  | 2.449 | Putative_integrase_core_domain_protein, conserved_hypothetical_protein, zf-CCHC-domain_containing_protein, zf-CCHC_and_Pfam-B_10329-domain_containing_protein                                                                                                                                                     |
| FAM4665 | 0 | 0 | 0 | 1  | 0 | 11 | 2.259 | neurogenic_locus_notch_protein_2                                                                                                                                                                                                                                                                                  |
| FAM3206 | 0 | 0 | 1 | 0  | 1 | 11 | 2.526 | NONE                                                                                                                                                                                                                                                                                                              |
| FAM4666 | 0 | 0 | 1 | 0  | 0 | 11 | 2.485 | NONE                                                                                                                                                                                                                                                                                                              |
| FAM5306 | 0 | 0 | 0 | 11 | 0 | 0  | 2.449 | hypothetical_protein, Pfam-B_10329-domain_containing_protein, Pfam-B_10329_and_zf-CCHC-domain_containing_protein, zf-CCHC_and_Pfam-B_10329-domain_containing_protein                                                                                                                                              |
| FAM5309 | 0 | 0 | 0 | 11 | 0 | 0  | 2.449 | hypothetical_protein, conserved_hypothetical_protein                                                                                                                                                                                                                                                              |
| FAM5313 | 0 | 0 | 0 | 0  | 0 | 11 | 2.449 | NONE                                                                                                                                                                                                                                                                                                              |
| FAM6036 | 0 | 0 | 0 | 10 | 0 | 0  | 2.449 | conserved_hypothetical_protein, hypothetical_protein                                                                                                                                                                                                                                                              |
| FAM6037 | 0 | 0 | 0 | 10 | 0 | 0  | 2.449 | hypothetical_protein, conserved_hypothetical_protein, peripheral_plasma_membrane_protein_CASK                                                                                                                                                                                                                     |
| FAM6044 | 0 | 0 | 0 | 10 | 0 | 0  | 2.449 | hypothetical_protein                                                                                                                                                                                                                                                                                              |
| FAM6050 | 0 | 0 | 0 | 0  | 0 | 10 | 2.449 | NONE                                                                                                                                                                                                                                                                                                              |
| FAM6042 | 1 | 0 | 0 | 8  | 0 | 1  | 2.229 | conserved_hypothetical_protein, zf-C2H2_4_and_zf-C2H2-domain_containing_protein, zinc_finger_protein, zinc_finger_protein_569, zf-C2H2_4_and_zf-C2H2_and_zf-C2H2_4_and_zf-C2H2-domain_containing_protein, zinc_finger_protein_729, pita_B, zf-H2C2_2_and_zf-C2H2_4_and_zf-C2H2-domain_containing_protein          |
| FAM6039 | 2 | 0 | 0 | 8  | 0 | 0  | 2.497 | Pfam-B_310-domain_containing_protein, something_about_silencing_protein_10                                                                                                                                                                                                                                        |
| FAM7543 | 0 | 0 | 0 | 8  | 0 | 0  | 2.449 | conserved_hypothetical_protein                                                                                                                                                                                                                                                                                    |
| FAM7544 | 0 | 0 | 0 | 8  | 0 | 0  | 2.449 | Pfam-B_10329-domain_containing_protein, RETRtransposon_family_member                                                                                                                                                                                                                                              |
| FAM7546 | 0 | 0 | 0 | 8  | 0 | 0  | 2.449 | conserved_hypothetical_protein, Dimer_Tnp_hAT-domain_containing_protein                                                                                                                                                                                                                                           |
| FAM7700 | 0 | 0 | 0 | 8  | 0 | 0  | 2.449 | hypothetical_protein                                                                                                                                                                                                                                                                                              |
| FAM6040 | 2 | 0 | 0 | 7  | 0 | 1  | 2.196 | gag_pre-integrals_and_rve_and_Pfam-B_10563_and_zf-CCHC_and_Pfam-B_11267-domain_containing_protein, zf-CCHC_and_Pfam-B_11267_and_UBN2-domain_containing_protein, putative_pol_polyprotein;_copia_type_polyprotein_putative, retrovirus_Pol_polyprotein, polyprotein, copia_type_polyprotein, reverse_transcriptase |
| FAM7548 | 0 | 0 | 0 | 7  | 0 | 1  | 2.139 | actin_protein_6A_like, Actin-domain_containing_protein                                                                                                                                                                                                                                                            |
| FAM8361 | 0 | 0 | 0 | 7  | 0 | 0  | 2.449 | conserved_hypothetical_protein, zf-CCHC-domain_containing_protein                                                                                                                                                                                                                                                 |
| FAM8364 | 0 | 0 | 0 | 7  | 0 | 0  | 2.449 | protein_crumbs, neurogenic_locus_notch_protein_2, Uncharacterized_transposase_protein, neurogenic_locus_notch_protein, crumbs_1                                                                                                                                                                                   |
| FAM8365 | 0 | 0 | 0 | 7  | 0 | 0  | 2.449 | conserved_hypothetical_protein, zinc_finger_protein_646, hypothetical_protein                                                                                                                                                                                                                                     |

|         |   |   |   |   |   |   |       |                                                                                                                                                                                                                                                                                                                                                                                                                                                                                                          |
|---------|---|---|---|---|---|---|-------|----------------------------------------------------------------------------------------------------------------------------------------------------------------------------------------------------------------------------------------------------------------------------------------------------------------------------------------------------------------------------------------------------------------------------------------------------------------------------------------------------------|
| FAM8369 | 0 | 0 | 0 | 7 | 0 | 0 | 2.449 | conserved_hypothetical_protein,Pfam-B_516-domain_containing_protein                                                                                                                                                                                                                                                                                                                                                                                                                                      |
| FAM8399 | 0 | 0 | 0 | 0 | 0 | 7 | 2.449 | NONE                                                                                                                                                                                                                                                                                                                                                                                                                                                                                                     |
| FAM3750 | 1 | 2 | 0 | 1 | 3 | 6 | 2.340 | onchocystatin                                                                                                                                                                                                                                                                                                                                                                                                                                                                                            |
| FAM5503 | 1 | 1 | 0 | 6 | 0 | 1 | 2.214 | zf-CCHC_and_Pfam-B_2545_and_Asp_protease_2_and_Pfam-B_2707_and_rve-domain_containing_protein,Gap_Pol_polyprotein,rve_and_Pfam-B_10563_and_zf-CB_2545_and_Asp_protease_2_and_RVT_1_and_Pfam-B_2707-domain_containing_protein,rve_and_zf-CCHC_and_Pfam-B_10329_and_RVT_1_and_Pfam-B_2707-domain_containing_protein,zf-CCHC_and_Asp_protease_2_and_Pfam-B_10329_and_RVT_1-domain_containing_protein,zf-H2C2_and_rve_and_Pfam-B_10329_and_B_2545_and_RVP_and_RVT_1_and_Pfam-B_2707-domain_containing_protein |
| FAM7545 | 1 | 0 | 0 | 6 | 0 | 1 | 2.138 | reverse_transcriptase:endonuclease,reverse_transcriptase,Pfam-B_595-domain_containing_protein                                                                                                                                                                                                                                                                                                                                                                                                            |
| FAM8363 | 0 | 0 | 0 | 6 | 0 | 1 | 2.082 | hypothetical_protein                                                                                                                                                                                                                                                                                                                                                                                                                                                                                     |
| FAM8370 | 0 | 0 | 0 | 6 | 0 | 1 | 2.082 | CUG-BP-and_ETR-3-like_factor_3,hypothetical_protein,Calcium_channel_protein,_putative                                                                                                                                                                                                                                                                                                                                                                                                                    |
| FAM8398 | 0 | 0 | 0 | 1 | 0 | 6 | 2.082 | hypothetical_protein                                                                                                                                                                                                                                                                                                                                                                                                                                                                                     |

Supplementary Table 11: Differential expression of mouse genes of interest between naïve and *T. muris*-infected cecum

| Cytokine                              | Ensembl gene id        | Known role                                                           | Direction        | Fold change        | FDR        |
|---------------------------------------|------------------------|----------------------------------------------------------------------|------------------|--------------------|------------|
| IFN-gamma                             | ENSMUSG00000005517     | Inflammation                                                         | Up               | 26                 | <5%        |
| IL-1 Beta                             | ENSMUSG000000027398    |                                                                      | Up               | 23                 | <5%        |
| IL-4                                  | ENSMUSG00000000869     |                                                                      | -                | -                  | -          |
| IL-5                                  | ENSMUSG000000036117    |                                                                      | -                | -                  | -          |
| IL-6                                  | ENSMUSG000000025746    |                                                                      | Up               | 17                 | <5%        |
| IL-9                                  | ENSMUSG000000021538    |                                                                      | -                | -                  | -          |
| IL-10                                 | ENSMUSG000000016529    |                                                                      | Up               | 20                 | 5-10%      |
| IL-13                                 | ENSMUSG000000020383    |                                                                      | -                | -                  | -          |
| IL-15                                 | ENSMUSG000000031712    |                                                                      | Down             | 4                  | <5%        |
| IL-16                                 | ENSMUSG00000001741     |                                                                      | Up               | 3                  | <5%        |
| IL-18                                 | ENSMUSG000000039217    |                                                                      | Down             | 10                 | <5%        |
| IL-21                                 | ENSMUSG000000027718    |                                                                      | Up               | Inf                | 5-10%      |
| IL-22                                 | ENSMUSG00000007469     | Therapeutic <i>T. trichiura</i> infection<br>(Broadhurst et al 2010) | Up               | 10                 | 5-10%      |
| IL-27                                 | ENSMUSG000000044701    |                                                                      | Up               | 17                 | 5-10%      |
| IL-33                                 | ENSMUSG000000024810    |                                                                      | Up               | 4                  | 5-10%      |
| IL-34                                 | ENSMUSG000000031750    |                                                                      | Up               | 5                  | <5%        |
| TNF                                   | ENSMUSG00000002440     | Inflammation                                                         | Up               | 12                 | <5%        |
| <b>Cytokine receptor</b>              | <b>Ensembl gene id</b> | <b>Known role</b>                                                    | <b>Direction</b> | <b>Fold change</b> | <b>FDR</b> |
| IL-1R antagonist                      | ENSMUSG000000026981    |                                                                      | Up               | 23                 | <5%        |
| IL-1R type II                         | ENSMUSG000000026073    |                                                                      | Up               | 6                  | <5%        |
| IL-2R beta                            | ENSMUSG000000068227    |                                                                      | Up               | 8                  | <5%        |
| IL-2R gamma                           | ENSMUSG000000031304    |                                                                      | Up               | 8                  | <5%        |
| IL-3R alpha                           | ENSMUSG000000068758    |                                                                      | Up               | 4                  | <5%        |
| IL-4R alpha                           | ENSMUSG000000030748    |                                                                      | Up               | 5                  | <5%        |
| IL-10R alpha                          | ENSMUSG000000032089    |                                                                      | Up               | 7                  | <5%        |
| IL-12R beta 1                         | ENSMUSG000000000791    |                                                                      | Up               | 17                 | <5%        |
| IL-12R beta 2                         | ENSMUSG000000018341    |                                                                      | Up               | 13                 | <5%        |
| IL-17R E                              | ENSMUSG000000043088    |                                                                      | Down             | 6                  | <5%        |
| IL-21R                                | ENSMUSG000000030745    |                                                                      | Up               | 5                  | <5%        |
| IL-27R alpha                          | ENSMUSG00000000546     | Colitis (Villarino et al. 2008)                                      | Up               | 3                  | 5-10%      |
| <b>Chemokine</b>                      | <b>Ensembl gene id</b> | <b>Known role</b>                                                    | <b>Direction</b> | <b>Fold change</b> | <b>FDR</b> |
| CCL2                                  | ENSMUSG00000003538     | Macrophage chemoattraction                                           | Up               | 42                 | <5%        |
| CCL5                                  | ENSMUSG00000003504     | monocyte/T cell/eosinophil chemoattractor                            | Up               | 21                 | <5%        |
| CCL7                                  | ENSMUSG00000003537     | Macrophage chemoattraction                                           | Up               | 13                 | <5%        |
| CXCL5                                 | ENSMUSG00000002937     | Neutrophil regulation/activation                                     | Up               | 19                 | <5%        |
| CXCL9                                 | ENSMUSG00000002941     | IFN-g induced chemoattractant for T cells                            | Up               | 97                 | <5%        |
| CXCL10                                | ENSMUSG00000003485     | Regulation of epithelial cell turnover                               | Up               | 20                 | <5%        |
| CXCL16                                | ENSMUSG00000001892     | NK T cell migration                                                  | Up               | 7                  | <5%        |
| <b>Chemokine receptor</b>             | <b>Ensembl gene id</b> | <b>Known role</b>                                                    | <b>Direction</b> | <b>Fold change</b> | <b>FDR</b> |
| CCR2                                  | ENSMUSG00000004910     | Macrophage chemoattraction                                           | Up               | 9                  | <5%        |
| CCR5                                  | ENSMUSG00000007922     | monocyte/T cell/eosinophil chemoattractant                           | Up               | 22                 | <5%        |
| CXCR2                                 | ENSMUSG00000002618     | Neutrophil regulation/activation                                     | Up               | 70                 | <5%        |
| CXCR3                                 | ENSMUSG00000005023     | Regulation of epithelial cell turnover                               | Up               | 14                 | <5%        |
| CXCR6                                 | ENSMUSG00000004852     | -                                                                    | Up               | 8                  | <5%        |
| <b>Immunoglobulin constant chains</b> | <b>Ensembl gene id</b> | <b>Known role</b>                                                    | <b>Direction</b> | <b>Fold change</b> | <b>FDR</b> |
| IgA                                   | ENSMUSG000000095079    |                                                                      | Up               | 4                  | <10%       |
| IgE                                   | ENSMUSG000000087642    |                                                                      | -                | -                  | -          |
| IgG1                                  | ENSMUSG000000076614    |                                                                      | Up               | 42                 | <5%        |
| IgG2B                                 | ENSMUSG000000076613    |                                                                      | Up               | 15                 | <5%        |
| IgG2C                                 | ENSMUSG000000076612    |                                                                      | Up               | 57                 | <5%        |
| IgM                                   | ENSMUSG000000076617    |                                                                      | Up               | 9                  | <5%        |
| <b>Other</b>                          | <b>Ensembl gene id</b> | <b>Known role</b>                                                    | <b>Direction</b> | <b>Fold change</b> | <b>FDR</b> |
| Arg1                                  | ENSMUSG000000019987    |                                                                      | Up               | 522                | <5%        |
| CD4                                   | ENSMUSG000000023274    |                                                                      | Up               | 4                  | <5%        |
| CD16                                  | ENSMUSG000000059089    |                                                                      | Up               | 44                 | <5%        |
| CD23                                  | ENSMUSG000000058715    |                                                                      | Up               | 6                  | <5%        |
| CD25                                  | ENSMUSG000000026770    |                                                                      | -                | -                  | -          |
| CD48                                  | ENSMUSG000000015355    |                                                                      | Up               | 4                  | <5%        |
| Foxp3                                 | ENSMUSG000000039521    |                                                                      | -                | -                  | -          |
| LCP2/SLP-76                           | ENSMUSG000000002699    |                                                                      | Up               | 8                  | <5%        |
| mcpt-1                                | ENSMUSG000000022227    |                                                                      | Up               | 109                | <5%        |
| RHOH                                  | ENSMUSG000000029204    |                                                                      | Up               | 4                  | <5%        |
| Ym1                                   | ENSMUSG000000040809    |                                                                      | Up               | 94                 | <5%        |

**Supplementary Table 15: Genomic libraries of *T. muris* and *T. trichiura***

**Illumina paired end sequence data for genome assembly**

| <b>Organism</b>     | <b>median insert size (bases)</b> | <b>read length (bases)</b> | <b>total yield (kilobases)</b> | <b>ENA sample accession number</b> | <b>library type</b> |
|---------------------|-----------------------------------|----------------------------|--------------------------------|------------------------------------|---------------------|
| <i>T. muris</i>     | 482                               | 76                         | 1,189,822                      | ERS016744                          | standard            |
| <i>T. muris</i>     | 237                               | 76                         | 1,065,280                      | ERS016965                          | PCR-free            |
| <i>T. muris</i>     | 241                               | 100                        | 19,432,799                     | ERS016965                          | PCR-free            |
| <i>T. trichiura</i> | 455                               | 100                        | 21,278,650                     | ERS056020                          | PCR-free            |

**Shotgun and paired end 454 sequence data for *T. muris* genome assembly**

| <b>library type</b> | <b>mean insert size (bases)</b> | <b>total yield (megabases)</b> | <b>ENA sample accession number</b> |
|---------------------|---------------------------------|--------------------------------|------------------------------------|
| shotgun             | n/a                             | 1376.7                         | ERS016965                          |
| paired              | 3000                            | 1468.1                         | ERS016965                          |
| paired              | 8000                            | 829.4                          | ERS244696                          |

**Illumina paired end sequence data for separate male- and female-specific chromosomal analyses in *T. muris***

| <b>Sex</b>    | <b>number of individuals</b> | <b>median insert size (bases)</b> | <b>read length (bases)</b> | <b>total yield (kilobases)</b> | <b>ENA sample accession number</b> |
|---------------|------------------------------|-----------------------------------|----------------------------|--------------------------------|------------------------------------|
| <i>male</i>   | 1                            | 350                               | 100                        | 17,856,062                     | ERS326152                          |
| <i>female</i> | 11                           | 346                               | 100                        | 18,913,337                     | ERS326151                          |

**Supplementary Table 16a: RNA-seq libraries of *Trichuris muris* life cycle stages, morphological regions, and genders**

| stage                          | organism part | number of reads | ENA sample accession number | ENA Study accession number | Array Express Study Accession Number | Approximate no. of worms |
|--------------------------------|---------------|-----------------|-----------------------------|----------------------------|--------------------------------------|--------------------------|
| female                         | whole         | 57,353,866      | ERS092077                   | ERP002000                  | E-ERAD-125                           | 20                       |
| male                           | whole         | 63,267,958      | ERS092078                   | ERP002000                  | E-ERAD-125                           | 40                       |
| L3                             | whole         | 97,219,262      | ERS092416                   | ERP002000                  | E-ERAD-125                           | 80                       |
| L3                             | whole         | 95,404,266      | ERS092417                   | ERP002000                  | E-ERAD-125                           | 80                       |
| L3                             | whole         | 77,412,612      | ERS092418                   | ERP002000                  | E-ERAD-125                           | 80                       |
| Adults                         | whole         | 78,034,450      | ERS092413                   | ERP002000                  | E-ERAD-125                           | 7                        |
| Adults                         | whole         | 76,443,982      | ERS092414                   | ERP002000                  | E-ERAD-125                           | 7                        |
| Adults                         | whole         | 97,388,714      | ERS092415                   | ERP002000                  | E-ERAD-125                           | 7                        |
| Adult male                     | whole         | 73,271,100      | ERS092411                   | ERP002000                  | E-ERAD-125                           | 15-20                    |
| Adult male                     | whole         | 93,014,642      | ERS092412                   | ERP002000                  | E-ERAD-125                           | 15-20                    |
| Adult female                   | whole         | 99,154,882      | ERS092410                   | ERP002000                  | E-ERAD-125                           | 15-20                    |
| Adult female                   | whole         | 95,489,468      | ERS092419                   | ERP002000                  | E-ERAD-125                           | 15-20                    |
| Adult (mixed) intestinal phase | anterior      | 19,042,100      | ERS092566                   | ERP002000                  | E-ERAD-125                           | 100                      |
| Adult (mixed) intestinal phase | anterior      | 20,480,010      | ERS092567                   | ERP002000                  | E-ERAD-125                           | 100                      |
| Adult (mixed) intestinal phase | anterior      | 39,431,492      | ERS092568                   | ERP002000                  | E-ERAD-125                           | 100                      |
| Adult female luminal phase     | rear end      | 25,216,324      | ERS092569                   | ERP002000                  | E-ERAD-125                           | 65                       |
| Adult female luminal phase     | rear end      | 22,233,346      | ERS092570                   | ERP002000                  | E-ERAD-125                           | 65                       |
| Adult female luminal phase     | rear end      | 25,753,804      | ERS092571                   | ERP002000                  | E-ERAD-125                           | 65                       |
| Adult male luminal phase       | rear end      | 19,998,130      | ERS092572                   | ERP002000                  | E-ERAD-125                           | 35                       |
| Adult male luminal phase       | rear end      | 28,575,550      | ERS092573                   | ERP002000                  | E-ERAD-125                           | 35                       |
| Adult male luminal phase       | rear end      | 23,479,798      | ERS092574                   | ERP002000                  | E-ERAD-125                           | 35                       |
| L2                             | whole         | 26,943,510      | ERS195817                   | ERP002000                  | E-ERAD-125                           | 150-450                  |

All data are 100 bp paired end reads.

**Supplementary Table 16b: RNA-seq of *Mus musculus* response to *Trichuris muris* infection**

| sample description                             | mouse identifier | number of reads | ENA sample accession number | ENA Study accession number | Array Express Study Accession Number |
|------------------------------------------------|------------------|-----------------|-----------------------------|----------------------------|--------------------------------------|
| infected wormy cecum, worms left in cecum      | 1                | 56,772,210      | ERS167948                   | ERP002560                  | E-ERAD-181                           |
| infected non-wormy cecum                       | 1                | 21,861,330      | ERS167949                   | ERP002560                  | E-ERAD-181                           |
| naïve MLN                                      | 1                | 38,681,928      | ERS167950                   | ERP002560                  | E-ERAD-181                           |
| infected wormy cecum, worms removed from cecum | 5                | 25,917,952      | ERS167951                   | ERP002560                  | E-ERAD-181                           |
| infected non-wormy cecum                       | 5                | 102,339,636     | ERS167952                   | ERP002560                  | E-ERAD-181                           |
| infected MLN                                   | 5                | 37,839,610      | ERS167953                   | ERP002560                  | E-ERAD-181                           |
| naïve wormy cecum                              | 9                | 30,878,770      | ERS167954                   | ERP002560                  | E-ERAD-181                           |
| naive non-wormy cecum                          | 9                | 58,081,706      | ERS167955                   | ERP002560                  | E-ERAD-181                           |
| naïve MLN                                      | 9                | 12,367,976      | ERS167956                   | ERP002560                  | E-ERAD-181                           |
| naïve wormy cecum                              | 12               | 26,882,810      | ERS167957                   | ERP002560                  | E-ERAD-181                           |
| naive non-wormy cecum                          | 12               | 35,551,572      | ERS167958                   | ERP002560                  | E-ERAD-181                           |
| naïve MLN                                      | 12               | 45,406,130      | ERS167959                   | ERP002560                  | E-ERAD-181                           |
| infected wormy cecum, worms left in cecum      | 2                | 38,508,088      | ERS167960                   | ERP002560                  | E-ERAD-181                           |
| infected non-wormy cecum                       | 2                | 16,629,034      | ERS167961                   | ERP002560                  | E-ERAD-181                           |
| infected MLN                                   | 2                | 13,393,252      | ERS167962                   | ERP002560                  | E-ERAD-181                           |
| infected wormy cecum, worms removed from cecum | 6                | 66,298,346      | ERS167963                   | ERP002560                  | E-ERAD-181                           |
| infected non-wormy cecum                       | 6                | 19,937,558      | ERS167964                   | ERP002560                  | E-ERAD-181                           |
| infected MLN                                   | 6                | 26,012,152      | ERS167965                   | ERP002560                  | E-ERAD-181                           |
| naïve wormy cecum                              | 10               | 122,959,842     | ERS167966                   | ERP002560                  | E-ERAD-181                           |
| naive non-wormy cecum                          | 10               | 29,089,220      | ERS167967                   | ERP002560                  | E-ERAD-181                           |
| naïve MLN                                      | 10               | 33,272,308      | ERS167968                   | ERP002560                  | E-ERAD-181                           |
| naïve wormy cecum                              | 13               | 77,912,600      | ERS167969                   | ERP002560                  | E-ERAD-181                           |
| naive non-wormy cecum                          | 13               | 31,619,046      | ERS167970                   | ERP002560                  | E-ERAD-181                           |
| naïve MLN                                      | 13               | 29,053,184      | ERS167971                   | ERP002560                  | E-ERAD-181                           |
| infected wormy cecum, worms left in cecum      | 3                | 38,260,350      | ERS167972                   | ERP002560                  | E-ERAD-181                           |
| infected non-wormy cecum                       | 3                | 41,858,106      | ERS167973                   | ERP002560                  | E-ERAD-181                           |
| infected MLN                                   | 3                | 28,546,718      | ERS167974                   | ERP002560                  | E-ERAD-181                           |
| infected wormy cecum, worms removed from cecum | 7                | 17,482,126      | ERS167975                   | ERP002560                  | E-ERAD-181                           |
| infected non-wormy cecum                       | 7                | 25,491,194      | ERS167976                   | ERP002560                  | E-ERAD-181                           |
| infected MLN                                   | 7                | 25,223,414      | ERS167977                   | ERP002560                  | E-ERAD-181                           |
| naïve wormy cecum                              | 11               | 23,179,374      | ERS167978                   | ERP002560                  | E-ERAD-181                           |
| naive non-wormy cecum                          | 11               | 18,646,504      | ERS167979                   | ERP002560                  | E-ERAD-181                           |
| naïve MLN                                      | 11               | 18,568,222      | ERS167980                   | ERP002560                  | E-ERAD-181                           |
| infected wormy cecum, worms left in cecum      | 4                | 13,766,456      | ERS167981                   | ERP002560                  | E-ERAD-181                           |
| infected non-wormy cecum                       | 4                | 35,879,338      | ERS167982                   | ERP002560                  | E-ERAD-181                           |
| infected MLN                                   | 4                | 31,194,586      | ERS167983                   | ERP002560                  | E-ERAD-181                           |
| infected wormy cecum, worms removed from cecum | 8                | 37,283,248      | ERS167984                   | ERP002560                  | E-ERAD-181                           |
| infected non-wormy cecum                       | 8                | 45,572,986      | ERS167985                   | ERP002560                  | E-ERAD-181                           |
| infected MLN                                   | 8                | 33,801,694      | ERS167986                   | ERP002560                  | E-ERAD-181                           |
| naïve wormy cecum                              | 14               | 29,559,234      | ERS167987                   | ERP002560                  | E-ERAD-181                           |
| naive non-wormy cecum                          | 14               | 30,191,428      | ERS167988                   | ERP002560                  | E-ERAD-181                           |
| naïve MLN                                      | 14               | 29,644,302      | ERS167989                   | ERP002560                  | E-ERAD-181                           |

All data are 100 bp paired end reads. Parasite-containing samples contained approximately 10 worms.

"Naïve" = from uninfected mouse; "wormy cecum" = a section of cecum where the worms reside; "non-wormy cecum" = a section of cecum without worms.

### III. SUPPLEMENTARY NOTE

#### *Trichuris muris* genome sequencing

##### **Illumina**

Illumina libraries originated from *T. muris* parasites, Edinburgh strain, grown in male athymic nude mice that were 6-12 weeks of age and bred in the Biological Services Unit at the University of Manchester. All mice were housed in isolator cages, and all animal experiments were performed under the auspices of the University of Manchester ethical review committee and under the Home Office Scientific Procedures Act (1986). The parasites were removed from the ceca of nude mice and cleaned to remove as much host contaminating material as possible. They were then cultured in single wells at 37°C, 5% CO<sub>2</sub> for up to 7 days in RPMI, 100U/ml penicillin, 100µg/ml of streptomycin. Unembryonated eggs were collected from the individually cultured females and embryonated in tissue culture flasks in milliQ water for at least 8 weeks in the dark to develop. Eggs from a single female worm were then used to re infect nude mice and passaged sequentially as above 5-7 times prior to selecting worms for DNA extraction to decrease genetic variability. Genomic DNA (gDNA) was obtained using DNA extraction buffer, briefly male worms were incubated overnight at 56°C in 0.1M Tris-HCL, pH 8.5, 0.05M EDTA, 0.2M NaCl, 1% w/v SDS and 200 µg/ml of proteinase K. Phenol, chloroform extraction was used to purify the gDNA and incubation at 37 °C for 30 min with 1.25U of RNase to remove contaminating RNA. The DNA was precipitated using 100% ethanol and glycogen. After centrifugation at 12000g, the pellet was resuspended in nuclease free water and concentration obtained with an Invitrogen Qubit fluorometer. Using protocols previously described gDNA was used directly for preparation of one amplification-free<sup>78</sup> and one standard Illumina library<sup>79,80</sup>. DNA was eluted after each enzymatic stage using a Qiagen QIAquick PCR purification kit. Size selection of the adapter ligated DNA was performed on a 2% agarose gel and the DNA extracted. The standard library was then amplified using 16 cycles of PCR. Further details are in Supplementary Table 15.

Libraries were denatured using 0.1M sodium hydroxide and diluted in a hybridisation buffer to allow the template strands to hybridise to adapters attached to the flowcell surface. Cluster amplification was performed on the Illumina cluster station or cBOT using the v4 cluster generation kit following the manufacturer's protocol and then a SYBRGreen QC was performed to measure cluster density and determine whether to

pass or fail the flowcell for sequencing, followed by linearization, blocking and hybridization of the R1 sequencing primer. The hybridized flow cells were loaded onto the Illumina Genome Analyser IIX for 76 cycles or the Illumina HiSeq for 100 cycles of sequencing-by-synthesis using the v4 or v5 SBS sequencing kit. *In situ*, the linearization, blocking and hybridization step was repeated to regenerate clusters, release the second strand for sequencing and to hybridise the R2 sequencing primer followed by another 76 or 100 cycles of sequencing to produce paired end reads. These steps were performed using proprietary reagents according to manufacturer's recommended protocol (<http://www.illumina.com/>). Data was analysed from the Illumina sequencing machines using the RTA1.6 or RTA1.8 analysis pipelines.

### **Male and female samples**

Adult male and female *T. muris* worms were collected from ceca of nude mice and cleaned to remove host tissue. Male and female worms were separated based on size and morphology. The posterior (reproductive) ends of eleven individual females were removed (and discarded) and the anterior ends were pooled together. Genomic DNA was extracted using the Promega Wizard DNA Purification Kit. Amplification-free Illumina libraries were produced using methods described above and sequenced on an Illumina HiSeq to produce 100bp paired-end reads.

### **454**

Genomic DNA, prepared using the method described above for Illumina sequencing, was used to produce paired-end (3 kb and 8 kb) and shotgun 454 libraries (Supplementary Table 15) using standard Roche protocols (<http://www.454.com>) and sequenced using the 454 Life Sciences GS-20 and GS-FLX sequencer (Roche).

### **Optical map**

High molecular weight *T. muris* genomic DNA was prepared by proteinase K lysis of trypsin digested adults mixed with molten agarose set in plugs. Briefly, male worms or mixed sexed adult worms were removed from the cecum of an athymic nude mouse and thoroughly cleaned to remove as much contaminating host material as possible. Agarose plugs were prepared using a Bio Rad CHEF genomic DNA plug kit, for mammalian DNA. The worms were chopped using a scalpel blade and re-suspended in cell lysis buffer. This was mixed in a 2:1 ratio with 2% CleanCut® agarose and set on ice. The plugs were incubated overnight at 56 °C in a proteinase



k buffer and washed 4 times the following day. The penultimate wash had 1mM PMSF added to inhibit further proteinase k digestion. The agarose plugs were stored at 4°C in kit wash buffer until processed. DNA molecules were stretched and immobilized along microfluidic channels before digestion with the restriction endonuclease SpeI, yielding a set of ordered restriction fragments in the order that they occur within the genome. The fragments were fluorescently stained and visualised to determine the fragment sizes. Assembling overlapping fragment patterns of single molecule restriction maps produced an optical map of the genome. The *T. muris* optical map consists of 46 contigs, an assembled size of 85.24Mb and approximately 70 x genome coverage of optical data. The optical data were generated and analysed using the Argus Optical Mapping System from OpGen and analysed with associated MapManager and MapSolver software tools (<http://www.opgen.com/products-services/argus-system>).

### ***T. muris* genome assembly and improvement**

For *T. muris*, 3,181 Mb of 454 reads (Supplementary Table 15) were assembled into contigs with Celera assembler<sup>54</sup> v7.0. In addition, 2.7 Gb of 76bp paired end Illumina reads were used to close 451 gaps and correct the sequence using 15 iterations of IMAGE<sup>57</sup> producing *T. muris* assembly v1.

Gap5<sup>81</sup> was used to interrogate and edit the version 1 assembly (un-softclipping reads and manually joining gaps based on read pairs and sequence matches). A separate *de novo* Illumina assembly using Velvet<sup>53</sup> v1.2.03 was performed and remapped to the Celera assembly, allowing 143 gaps in the Celera assembly to be joined using consensus sequence from contigs in the Velvet assembly. Contamination was removed by identifying contigs with high homology to non-invertebrate genes. Inverted repeats were identified by (i) observing incorrectly orientated read pairs at sequence gaps between contigs and (ii) sequence searches hitting to two or more places either side of the gap. These were resolved by correct placement of spanning paired end reads within gap5. Following the manual correction of misassemblies as described above, re-scaffolding was performed using SSPACE<sup>56</sup> and gaps were subsequently closed using 20 iterations of IMAGE<sup>57</sup>, resulting in **assembly v2.1**.

Assembly v2.1 was further improved by using Reapr<sup>55</sup> to identify potential misassembled regions, which were then manually fixed in Gap5<sup>81</sup>. Additional scaffolding was performed in Gap5 using paired end read information. These improved scaffolds were then aligned against the optical map contigs in MapSolver (OpGen), allowing incorrect joins in the sequence assembly to be resolved and new joins to be made. Typically, sequence scaffolds and optical contigs did not begin or end at the same point; many optical scaffolds extended beyond sequence scaffolds and *vice versa*. Therefore, a combination of the two data types (optical scaffolds and assembly sequence scaffolds) was used to correct assembly errors, resulting in genome **assembly v3.0**. Finally, sequence scaffolds that were confidently spanned by optical map contigs were joined even in cases where the corresponding gaps were larger than 10kb. Such sequence scaffolds were joined by a stretch of the letter "N" of appropriate length to indicate the approximate gap length as evidenced by the optical map. This produced large linkage groups ("superscaffolds") and resulted in the final genome **assembly v4.0**.

### ***T. trichiura* genome sequencing**

Adult *T. trichiura* worms were obtained from young children with *T. trichiura* ova in stool samples. The study protocol was approved by the ethics committees of the Hospital Pedro Vicente Maldonado, Pichincha Province, and Pontificia Universidad Catolica del Ecuador, Quito, Ecuador. Informed written consent was obtained from the mother or primary carer of each child. Children were treated with a single dose of 5 mg/kg of Combantrin (oxantel and pyrantel pamoate, Pfizer) and stool samples were collected for 24 hours after treatment. Expelled worms were washed thoroughly in sterile saline and stored in liquid nitrogen before being shipped on dry ice. Genomic DNA (234 ng) isolated from a single male adult worm, using Qiagen Genomic-tip-20, was used to make a PCR-free short fragment Illumina library using the same protocol as used for *T. muris* above.

### ***T. trichiura* genome assembly and improvement**

First, 450 bp fragment paired end Illumina reads were corrected and assembled using SGA<sup>52</sup> v0.9.17. This draft assembly was then used to calculate the highest occurrence of unique k-mers between odd values from 41 to 81 using GenomeTools (<http://genometools.org>). This kmer along with the corrected sequence reads was subsequently used to generate a second assembly using Velvet<sup>53</sup> v1.2.03. Scaffolds less than 500bp from this assembly were discarded. A hybrid assembly was created

by merging the SGA assembly with scaffolds greater than 15 kb from the Velvet assembly. 11 iterations of IMAGE gap closure<sup>57</sup> were run on the hybrid assembly and further gaps were closed manually within Gap5<sup>81</sup>. Illumina paired end reads that failed to map to this improved hybrid assembly were assembled with Velvet<sup>53</sup> to create a 'bin' assembly, which was merged with the improved hybrid assembly. Contamination was removed by identifying contigs with high homology to non-invertebrate genes. Further scaffolding was performed with SSPACE and gap closure undertaken using IMAGE<sup>57</sup> (2 iterations) followed by Gapfiller<sup>58</sup>. Manual improvement was then carried out in Gap5<sup>81</sup> by using Reapr<sup>55</sup> to target misassemblies, and gaps were closed manually to overcome the fragmentation within the assembly caused by haplotypic differences. Following manual improvement, ICORN<sup>82</sup> v2 was run to resolve any errors created by the process of merging haplotypic sequence, ensuring that a true representation of one or other allele was achieved over at least the length of the Illumina library fragment size (~450 bp) and to reduce the amount of phasing between haplotypes. Finally, IMAGE<sup>57</sup> (3 iterations) and Gapfiller<sup>58</sup> were run once more, resulting in v2.0 of the *T. trichiura* genome assembly. Finally, contamination screening was performed again, yielding assembly v2.1.

### **Transcriptome sequencing - *T. muris***

Adult worms or larval stages were prepared using TRIZOL® and lysing matrix D, (1.4 mm ceramic spheres) and a Fastprep24 both from MP biomedical. The tubes containing worms, TRIZOL and matrix were subjected to 3 x 20 second cycles and placed on ice in between each cycle. RNA extraction was carried out according to the manufacturers protocol and RNA was resuspended in water and quantified using an Agilent 2100 Bioanalyzer microfluidics platform.

Paired end Illumina transcriptome libraries were prepared from total RNA. Two protocols (TruSeq and Illumina mRNA-seq kit) were used for preparing the Illumina transcriptome libraries listed in Supplementary Table 16. Polyadenylated mRNA was purified from total RNA using oligo-dT dynabead selection. In the TruSeq protocol, enzymatic fragmentation was used, and in the Illumina mRNA-seq kit protocol fragmentation was performed using metal ion hydrolysis with the Ambion RNA fragmentation kit. First strand synthesis, primed using random oligonucleotides, was followed by 2nd strand synthesis with RNaseH and DNAPoll to produce double-stranded cDNA using the Illumina mRNA Seq kit or the TruSeq Illumina kit. Template

DNA fragments were end-repaired with T4 and Klenow DNA polymerases and blunt-ended with T4 polynucleotide kinase. A single 3' adenosine was added to the repaired ends using Klenow exo- and dATP to reduce template concatemerization and adapter dimer formation, and to increase the efficiency of adapter ligation. Adapters (containing primer sites for sequencing, and index sequences when using the TruSeq protocol) were then ligated. Libraries made with the TruSeq protocol were amplified by PCR (to enrich for properly ligated template strands, to generate enough DNA, and to add primers for flowcell surface annealing). AMPure SPRI beads were used to purify amplified templates before pooling based on quantification using an Agilent Bioanalyser chip. Pooled TruSeq libraries were then pooled and size selected (300-400bp fragments) using the Caliper. After adaptor ligation, individual libraries made with the Illumina mRNA-seq kit were size selected using the caliper before PCR amplification followed by AMPure SPRI bead clean up and removal of adaptors with a second Caliper run. Kapa Illumina SYBR Fast qPCR kit was used to quantify the Illumina mRNA-seq libraries before pooling. All transcriptome libraries were run on Illumina HiSeq 2000 sequencing machines as described for genome Illumina sequencing above.

## Gene predictions

### *T. muris*

CEGMA predictions<sup>6</sup> were first used to train the *T. muris*-specific parameters in Augustus<sup>59</sup> v2.4. Split RNAseq reads suggestive of intron boundaries were converted into intron hints and were used to create a first set of *de novo* gene predictions with Augustus. Based on these, a set of 469 manually curated gene predictions were created and used to re-train Augustus. The re-trained Augustus v2.5.5 predictor was then used in conjunction with RNAseq hints to predict **gene set v2.1** with 12,126 gene models, based on genome assembly v2.1. A set of 172 genes that were either of high interest (e.g. WAP domain-containing proteins) or appeared to be incorrect based on semi-automatic screens and manual inspection (e.g. extremely uneven RNAseq coverage across a gene) were then manually curated to yield **gene set v2.2** with 12,145 genes. In addition, 1,141 likely transposon-related genes were identified and removed to yield the final **gene set v2.3** containing 11,004 genes. Likely transposon-related genes were identified based on RepeatRunner<sup>83</sup> (run as part of Maker, see below for *T. trichiura*) and on the presence in the predicted protein sequences of any of the following Pfam domains: PF00077, PF00078, PF00665,

PF00680, PF01541, PF03184, PF03221, PF03564, PF03732, PF05380, PF07727, PF10551, PF12762, PF13456, PF13961, and PF14227 (Pfam<sup>84</sup> v27; predicted as part of Interproscan, see below). Potentially transposon-related genes were retained in the gene set if they were predicted to also contain another, not transposon-related Pfam domain.

### ***T. trichiura***

Gene predictions for *T. trichiura* were conducted by various methods available in MAKER<sup>60</sup> v2.2.28. The MAKER annotation pipeline consists of 4 general steps to generate high-quality annotations by taking into account evidence from multiple sources. First, assembled contigs (genome assembly v2.0) were filtered against RepeatRunner<sup>83</sup> and a species-specific repeat library (generated by Repeat Modeler<sup>85</sup> [www.repeatmasker.org]) using RepeatMasker<sup>86</sup> (http://www.repeatmasker.org), to identify and mask repetitive elements in the genome. Second, gene predictors Augustus<sup>59</sup> v2.5.5, GeneMark-ES<sup>61</sup> v2.3a (self-trained), and SNAP<sup>62</sup> 2013-02-16 were employed to generate *ab initio* gene predictions that can use evidence within Maker. Further species-specific gene models were provided to Maker using comparative algorithms against the *T. trichiura* genome: genBlastG<sup>87</sup> output of *Caenorhabditis elegans* gene models (WormBase<sup>88</sup>) and RATT<sup>89</sup> (Rapid Annotation Transfer Tool) output based on *T. muris* gene models. These models cannot be influenced by Maker evidence as they were provided by GFF file. Next, species-specific cDNAs and proteins from related organisms were aligned against the genome using BLASTN and BLASTX<sup>90</sup>, and these alignments were further refined with respect to splice sites using Exonerate<sup>91</sup>. As there are no publicly available species-specific expressed sequence tags (ESTs) and just five cDNAs available from INSDC<sup>92</sup> (International Nucleotide Sequence Database Consortium), the contribution of these data as evidence is minimal. Finally, the protein homology alignments, comparative gene models and *ab initio* gene predictions were integrated and filtered by MAKER and in-house scripts to produce a set of evidence-informed gene annotations.

The MAKER genome annotation pipeline was run three consecutive times. 1) In the absence of a species-specific trained gene predictor, Augustus and SNAP were trained using CEGMA<sup>6</sup> protein evidence gained from the default eukaryotic orthologous groups (KOGs) and HMM profiles of nematode orthologous groups<sup>11</sup> (NOGs). 2) The first run of MAKER was performed using the est2genome and

protein2genome option with the handful of taxon-specific cDNAs and nematode protein sequences, respectively. Gene models obtained from the first run were used to retrain SNAP and models from the second run were used to retrain Augustus. 3) With the trained models, MAKER was run a third time using a taxonomically broader protein set that included metazoan proteins from the UniProt Complete proteome database<sup>93</sup> and a subset of helminth proteomes from GeneDB<sup>94</sup>, yielding **gene set v2.0** (based on genome assembly v2.0). Removing genes located on genome scaffolds identified as contamination (assembly v2.1) resulted in **gene set v2.1** with 9,856 genes. Finally, 206 likely transposon-related genes were identified (as described for the *T. muris* gene set) and removed to yield the final gene set **v2.2** containing 9,650 genes.

## Functional gene annotation

Gene product descriptions for *T. muris* were determined as follows: gene models were searched against the UniProt database using BLASTP<sup>90</sup>, and the top 10 hits for each gene were retrieved. The product descriptions of the BLAST hits were filtered using custom-built scripts. For genes without a good or informative BLAST hit (e-value < 0.0001 or many annotations as “hypothetical”), gene product descriptions were - if possible - based on Pfam protein domains predicted with Interproscan<sup>77</sup>. Genes lacking both Pfam domain and BLAST hit were labelled “hypothetical protein”. For *T. trichiura* genes with a one-to-one ortholog in *T. muris* (as determined by OMA<sup>65</sup> v0.99t) product names were transferred between the orthologs. For all other *T. trichiura* genes, gene product descriptions were determined as described above for *T. muris* genes.

For further functional characterisation of the proteins, Interproscan v5.0.7 was run on both *Trichuris* proteomes. InterproScan conducted searches against Phobius<sup>95</sup> v1.01 to detect signal peptides and transmembrane domains, and against the following databases to identify further functional protein domains: Pfam<sup>84</sup> v27.0, SMART<sup>96</sup> v6.2, Gene3D v3.5.0, PANTHER v7.2, SUPERFAMILY v1.75, PRINTS v42.0, ProSiteProfiles v20.89, and ProSitePatterns. *T. muris* has 1300 genes with predicted signal peptides, and *T. trichiura* has 966. GO terms were assigned to proteins based on the Interpro<sup>97</sup> results, collecting GO term assignments associated with hits to Pfam and an E-value <= 0.01. Illustrations of protein domain architectures (“gene cartoons”) were based on Interproscan v5.0.7 results for searches against the databases Pfam, SMART, and Phobius. Sequence logos for WAP domain-containing

proteins were based on WAP domains as identified by Interpro (IPR008197). The following putative WAP domains were excluded from this analysis: WAP domains predicted to be shorter than 35 or longer than 55 amino acids, predicted to not contain any or to contain two "CC" dipeptides, and domains derived from the *Trichuris* and *Trichinella* homologs of mesocentin (TMUE\_s0077003100, TTRE\_0000351901, EFV57447). As a result, the sequence logos were based on 137 WAP domains from 42 proteins of *T. muris*, 61 WAP domains from 20 proteins of *T. trichiura*, 58 WAP domains from 23 proteins of *T. spiralis*, 38 WAP domains from 26 proteins of *H. sapiens*, and 19 WAP domains from 8 proteins of *C. elegans*. WAP domain alignments were produced with Mafft<sup>66</sup> v6.857 with the `-auto` parameter, and the sequence logos were created with the weblogo<sup>98</sup> server at <http://weblogo.berkeley.edu/logo.cgi>. The cysteine disulfide bonds highlighted in the sequence logo are based on the structure of the human proteins<sup>99</sup>. Proteases and protease inhibitors were detected using the MEROPS batch BLAST server<sup>100</sup>. KEGG orthology (KO) identifiers were based on bi-directional best hits using the KAAS webserver<sup>101</sup>.

## Gene family clustering and phylogenetic analysis

Gene family clusters were predicted using OrthoMCL<sup>63</sup> v2.0, and orthologs predicted using Inparanoid<sup>64</sup> v4.1. Identity between orthologs was calculated based on unfiltered global alignments of these pairs using Mafft<sup>66</sup> v6.857 with the `-auto` parameter. The phylogenetic tree in Supplementary Fig. 4 was constructed from the 236 gene families that contain only a single gene per genome and are present in at least 6 of the 8 species included in the comparison. Predicted amino acid sequence for each of these proteins were aligned using Mafft as above, and these alignments trimmed using GBLOCKS<sup>67</sup> v0.91b with options `'-t=p -s=y -p=s'`. The best-fitting empirical model of amino acid substitution for each alignment was found under the minimum AICc criterion from those implemented in RAxMLHPC<sup>68</sup> v7.2.8, and the maximum-likelihood phylogeny found using the best model for each alignment as a partitioned analysis in RAxMLHPC, using the default rapid heuristic algorithm, and with clade support estimated from 1,000 bootstrap samples. The pattern of gene family gains and losses on this tree was inferred under the dollo parsimony algorithm using the dollop program from the v3.69 of the Phylip package<sup>102</sup>.

The phylogenetic tree for DNase II-like proteins was created based on Interpro-predicted DNase II protein domains (IPR004947). For *Trichuris* spp. such protein

domains were identified in our *Trichuris* gene sets, and for select other taxa relevant proteins were identified and downloaded from the Interpro website (<http://www.ebi.ac.uk/interpro/entry/IPR004947>) and the DNase II domains extracted according to the predicted domain boundaries. DNase II domains shorter than 50 amino acids or longer than 400 amino acids were discarded. The tree was thus based on the DNase II domains of 18 *T. muris* proteins (20 domains), 15 *T. trichiura* proteins, 166 *T. spiralis* proteins (178 domains), 17 proteins of other nematodes, 5 proteins of other invertebrates, 8 human proteins, 5 mouse proteins, and 6 other vertebrate proteins. A multiple protein sequence alignment was created with MAFFT<sup>66</sup> v6.857 employing the `-auto` parameter. Alignment positions with more than 50% gaps were discarded, followed by removal of DNase II domain sequences that contained more than 50% gaps. A maximum-likelihood tree was calculated with RAXMLHPC<sup>68</sup> v7.7.2 using the WAG amino acid matrix, optimization of substitution rates, a GAMMA model of rate heterogeneity, and an estimation of the proportion of invariable sites. Clade support was estimated based on 500 bootstrap replicates. The resulting tree was visualized using FigTree v1.4.0 (<http://tree.bio.ed.ac.uk/software/figtree/>).

## Chromosome-level analysis

### Assigning chromosomal linkage groups by gene orthology

RATT<sup>89</sup> was used to transfer gene models from *T. muris* genome assembly v2.1 to assembly v4. For the 17 largest scaffolds of *T. muris* (assembly v4) and the 11 largest scaffolds of *T. spiralis*, the numbers of one-to-one orthologs - as identified by Inparanoid<sup>64</sup> v4.1 - between the *T. muris* and the *T. spiralis* scaffolds were counted and the resulting data subjected to clustering by `hclust` in R, which identified 3 chromosomal linkage groups for each species (Fig. 1a). The linkage group assignments made for *T. spiralis* were then used to assign to linkage groups all scaffolds of *T. muris* that were linked by at least 3 one-to-one orthologs to the corresponding *T. spiralis* genome scaffold (Supplementary Table 1a). As a result, 48 *T. muris* scaffolds representing 90.6% of the assembly could be assigned to one of the three linkage groups. Similarly, 483 scaffolds representing 61.0% of the *T. trichiura* genome assembly v2.1 could be assigned to one of the three chromosomal linkage groups based on one-to-one orthologs with *T. muris* (Supplementary Table 1b).



## Calculating read coverage and heterozygosity

Relative read coverage and heterozygosity per chromosomal linkage group (Fig. 1b) were determined by first mapping Illumina data against the relevant genome assembly using SMALT v0.7.4 (<http://www.sanger.ac.uk/resources/software/smalt/>) employing an exhaustive search (-x) and repetitive mapping (-r) with parameters wordlen=13 (-k), skipstep=2 (-s), minid=0.75 (-y), and insertmax=1000 (-i). Absolute read coverage was determined by running the genomcov command of BEDTools<sup>69</sup> v2.17.0 over a BAM alignment file, followed by calculating both median and mean read coverage per genomic scaffold. Relative read coverage was determined by dividing the absolute median or mean read coverage of a scaffold by the absolute median or mean read coverage of all scaffolds assigned to linkage groups 1 and 2 (which represent the two autosomes). For the plots in Fig. 1b, binned read coverage was calculated for windows of 10kb, discarding genomic windows shorter than 5kb. A pileup including base and variant calling was generated from the read alignment by SAMtools mpileup. The number of heterozygous sites was determined per 10kb window of genomic sequence based on the genotype tag (GT) in the VCF file, filtering for a genotype quality (GQ) of >90 (phred-scaled). Genomic windows shorter than 5kb (e.g. at the end of scaffolds) were not included in the analysis.

## Read coverage to infer chromosomal location and estimate sequence lengths

Read coverage, and in particular gender-specific read coverage, was used to help infer the chromosomal location (i.e. autosomal, X chromosomal, Y chromosomal, shared female/male, or centromeric) that genomic scaffolds represent (Supplementary Table 1c). To do so we analysed both median and mean read coverage over genomic scaffolds. **Median read coverage** over a scaffold is a measure that is more resistant to occasional outliers such as low coverage in SNP-dense regions and high coverage in regions of the assembly containing "**collapsed repeats**" (i.e. regions that occur as multiple near-identical repeat units in the actual parasite genome but are represented by fewer or even only a single such repeat unit in the genome assembly, leading to an artifactual pileup of sequence reads over such collapsed regions of the genome assembly). Median read coverage is therefore an appropriate and accurate metric for scaffolds whose sequence is well resolved and corresponds correctly to the actual parasite genome. In contrast, **mean read coverage** is a more appropriate metric for the analysis of scaffolds that contain a high proportion of collapsed repeats, which also often leads to highly uneven read

coverage across a scaffold. In such cases, the median read coverage may lead to spurious results. In addition, the read coverage mean (as opposed to the median) is the more adequate metric to quantitatively reflect the actual DNA content in the parasite represented by a genomic scaffold, and may therefore be used to estimate the true, "uncollapsed" length of genomic sequence. A summary of such estimated chromosomal lengths is provided in Supplementary Table 1d, resulting in an estimated haploid female genome size for *T. muris* of 106.01 Mb. Read coverage was visualized by directly showing mapped Illumina read coverage over the genome sequence using Artemis<sup>103</sup> (see Supplementary Fig. 2). Scaffolds with particularly low read coverage (i.e. if the sum of relative median read coverage in females and males - which would be expected to be 200% for the autosomes, 150% for the X chromosome, and 100% for the Y chromosome - was <75%) were excluded from further analysis.

### **X chromosome**

In males, the scaffolds of one genomic linkage group (as defined by gene orthology, see above) consistently showed a 50% reduced median read coverage compared to the median read coverage observed in scaffolds assigned to the other two linkage groups in both *T. muris* (absolute male median read coverage of 79 vs 159, Supplementary Table 1a) and *T. trichiura* (absolute male median read coverage of 97 vs 193, Supplementary Table 1b), whereas in *T. muris* females the median read coverage remained essentially the same (absolute female median read coverage of 160 vs 161, Supplementary Table 1a) - thereby allowing this linkage group to be identified as representing the X chromosome. Scaffolds that could not be assigned to a linkage group based on gene orthology were also inferred to belong to the X chromosome if (1) their median read coverage in females was the same as the median autosomal read coverage (i.e. if the relative median coverage was between 0.8 and 1.2), and if (2) their relative median read coverage in males was reduced by about 50% (i.e. if the ratio of relative median read coverage in male / females was between 0.4 and 0.6) (Supplementary Table 1c).

### **Shared female/male**

Other scaffolds that could not be assigned to a linkage group based on gene orthology showed approximately equal read coverage in both females and males of *T. muris*. Such sequences could either derive from one of the autosomes or be located on both the X and the Y chromosome. Scaffolds that were not already

assigned to a linkage group based on gene orthology or assigned to the X chromosome based on coverage (see above) were therefore labeled "shared female/male" if they showed a ratio of both relative median and relative mean read coverage for male vs. females of between 0.8 and 1.2 (Supplementary Table 1c).

## Y chromosome

Scaffolds for which the relative mean read coverage in males was greater than 3 times the relative mean read coverage in females were inferred to represent the Y chromosome (Supplementary Table 1c). This rule assigns 179 genomic scaffolds of *T. muris* to the Y chromosome, with 166 of these scaffolds (92.7%) comprising significant amounts of collapsed repetitive content (defined as scaffolds where the sum of relative mean read coverage in females and males - which would be expected to be 200% for the autosomes, 150% for the X chromosome, and 100% for the Y chromosome - was >300%). Due to this extraordinarily high proportion of repetitive genomic content, the estimated (based on read coverage) "uncollapsed" length of the Y chromosome of 24.42 Mb (Supplementary Table 1d) is significantly larger than the simple sum of the corresponding 179 scaffolds of the assembly (0.64 Mb). In fact, this estimated length of the Y chromosome is nearly as large as the estimated lengths of the X chromosome (27.00 Mb) and the two autosomes (31.96 Mb and 25.70 Mb), which is in good agreement with published data<sup>7</sup>.

## Centromeres

Three genomic scaffolds of *T. muris* with particularly high read coverage (TMUE\_000352, TMUE\_000164, TMUE\_000165) exhibited a repeat structure suggestive of centromeric sequences (Supplementary Fig. 3), with repeat units of both 164 bp and 176 bp length, which is very similar to the length of the ~171 bp-long monomers of human centromeric alpha-satellite DNA<sup>104</sup>. Together, these putative centromeric sequences are estimated to comprise approximately 5.33 Mb, which corresponds to 5.0% of the *T. muris* genome (Supplementary Table 1d). The repeat structure of these genomic scaffolds is illustrated by dot-plots that were created with YASS<sup>105</sup> at <http://bioinfo.lifl.fr/yass/> and by a multiple sequence alignment that was generated with MAFFT<sup>66</sup> v6.85 at <http://www.ebi.ac.uk/Tools/msa/mafft/> and visualised using Jalview<sup>106</sup> v2.8 at <http://www.jalview.org/> (Supplementary Fig. 3).

## Gene expression analysis - *T. muris*

Paired-end Illumina reads derived from transcriptome sequencing (Supplementary Table 16a) were mapped to the *T. muris* genome sequence using TopHat<sup>71</sup> v1.4.1. The number of reads per gene was determined with BEDTools<sup>69</sup> v2.10.1 and calculated by summing the raw reads over all exons of a gene (*T. muris* gene set v2.2). Differential gene expression analysis between different biological samples was carried out using the Bioconductor package edgeR<sup>73</sup> v3.2.4 and by calculating tagwise dispersion followed by the exact test for differential expression. Genes represented by fewer than two counts per million (CPM) in at least three of the 20 samples were discarded, yielding expression data for 9,858 of 11,004 *T. muris* genes. For the differential expression analysis for the pairwise comparison of *T. muris* anterior versus mixed rear, "mixed rear" was defined as comprising samples "female rear" and "male rear". After having provided edgeR with the data of all parasite RNAseq samples at once and having carried out normalization for library size (calcNormFactors()), the library size-adjusted read counts ("pseudo-counts" in edgeR) were divided by gene length to yield "normalised counts per kb of gene length", which were used to compare transcript-level expression of genes between samples.

GO term enrichment analysis was performed with the Bioconductor package topGO<sup>75</sup> v2.12.0, selecting a minimum node size of 5 and the "classic" algorithm under the Fisher statistic. Protein domain enrichment analysis was based on the Interproscan v5.0.7 results (see above). Protein domain predictions were included if the E-value was smaller than 0.01 (Pfam and Gene3D) or 0.05 (SMART), while for other database searches E-values were not available. The number of proteins with a given protein domain (i.e. a protein with multiple copies of the same domain was counted only once) were then counted in the results of the differential expression analysis carried out with edgeR, accepting a transcript as differentially expressed in a given pairwise comparison if the following conditions were met: FDR  $\leq$  1E-5 and fold-change  $\geq$  2.0. P-values for the statistical enrichment of a given protein domain in a given differential expression comparison were calculated in R using Fisher's exact test (two-sided) and were then multiplied by the number of tests carried out for the results of a given protein domain database to yield an adjusted P-value (Supplementary Table 8).

## Identification of novel drug targets

In order to do a bioinformatics ranking of all proteins in *T. muris* (gene set v2.3) for their suitability as a drug target (Supplementary Tables 13, 14), we used the following information:

1. **Trichuris expression** data, i.e. edgeR-normalised expression values per kb of gene length as described above.
2. **Orthology** of *T. muris* protein sequences to those in *T. trichiura* was identified by Inparanoid (see above). Orthology to *C. elegans*, mouse, human and drug targets was determined using a stand-alone version of OMA<sup>65</sup> v0.99t.
3. Protein homolog **essentiality** in mouse and *C. elegans*: mouse phenotype data was retrieved from Mouse Genome Informatics (<http://www.informatics.jax.org>) downloaded through the "Genes and Markers Query Form", and *C. elegans* data were retrieved from Wormbase using WormMart (Wormbase.org). Only lethal phenotypes were selected.
4. Whether a protein is predicted to be an **enzyme**, as evidenced by a KEGG orthology (KO) identifier.
5. **Druggability** information from ChEMBL<sup>107</sup>. Druggability of potential targets was assessed using ChEMBL Ensemble scores which were determined as follows: all Interproscan predictions for *T. muris* proteins with E-value  $\leq 0.001$  and associated Interpro accession number were collected, representing predictions by Pfam, SMART, TIGRFAM, Gene3D, and PIRSF. All Protein Data Bank (PDB) entries associated with the Interpro domains were downloaded from Interpro (e.g. <http://www.ebi.ac.uk/interpro/entry/IPR001031/structures>) and the maximum Ensemble score per PDB accession was extracted from table "domain\_drugability.txt" v2.0 from ChEMBL (<ftp://ftp.ebi.ac.uk/pub/databases/chembl/DrugEBllity/releases/2.0/>). The maximum ChEMBL Ensemble score of all PDB entries associated with an Interpro domain was used as this Interpro domain's Ensemble score. Finally, the Ensemble score of a protein was determined as the maximum Ensemble score of any of its predicted protein domains.
6. **DrugBank**<sup>51</sup> (<http://www.drugbank.ca/downloads>): drug target sequences for "All drug targets" (n=3985) and "Approved drug targets" (n =1479). The drugs associated with drug targets were extracted from Drugbank (e.g. <http://www.drugbank.ca/molecules/1295>) and filtered for "approved" drugs while

nutraceuticals were excluded. Orthologs were extracted between DrugBank and the *Trichuris* species using OMA<sup>65</sup> v0.99t.

**7. Therapeutic Targets Database<sup>108</sup> sequence data:** for all targets (n=1502), and sequence data for successful targets (n=334) and TTD targets information ([http://bidd.nus.edu.sg/group/cjttd/TTD\\_Download.asp](http://bidd.nus.edu.sg/group/cjttd/TTD_Download.asp)). Orthologs were extracted between TTD and the *Trichuris* species using OMA<sup>65</sup> v0.99t.

8. The results were manually inspected, nutraceutical targets filtered out, and further investigated using literature searches.

### **Transcriptome sequencing - mouse**

Fourteen male C57BL/6 mice 6-8 weeks of age (purchased from Harlan Olac) were infected with approximately 25 *T. muris* eggs by oral gavage and were killed 42 days post infection alongside uninfected controls. C57BL/6 mice are susceptible to a low dose *T. muris* infection, resulting in chronic infection. The samples taken from the mice were as follows. Mesenteric lymph node, MLN, a section of cecum where the worms reside and a section of cecum where there were no worms. These were termed “wormy” and “non wormy cecum”. In half of the “wormy cecum” samples the worms were left “in situ” (n=4), and in half the worms were removed (n=4). The same samples were generated from uninfected controls resulting in samples termed, for example, uninfected wormy cecum. Serum was also taken from these mice to confirm infection status of the mice by ELISA. We examined tissues from the cecum and mesenteric lymph node (MLN) in naïve and infected mice to determine the response to infection. Specifically we looked at “wormy” cecum, where worms preferentially bind in a low dose infection and “non-wormy” cecum where they do not. Each of these was considered in both naïve and infected mice. As an additional control we sequenced both infected wormy cecum with the worm removed, as well as with the worm in.

Tissue samples were removed from RNeasy Lysis Buffer (Qiagen) and washed once in 1X PBS. The material was mechanically homogenized in 1ml TRIzol (Invitrogen). After the addition of 200 ul chloroform with isoamyl alcohol (24:1), the aqueous phase was aspirated and 1 volume of 70% ethanol was added. The sample was added to an RNeasy Mini spin column (Qiagen), washed and eluted according to the manufacturer's instructions. Quantity and quality of the RNA was assessed using the Agilent Bioanalyzer. Transcriptome libraries (Supplementary Table 16b) were made

using the TruSeq kit and sequencing method as described above ('Transcriptome sequencing – *T. muris*').

### **Gene expression analysis - mouse**

A combined reference of mouse (mm10) and *T. muris* transcripts (*T. muris* gene set v2.2) was prepared by extracting transcript sequences from the genome annotation. Paired-end Illumina reads were mapped to the reference using Bowtie2<sup>109</sup> and the effective numbers of reads per transcript were enumerated using eXpress<sup>72</sup>. The number of reads per gene was then calculated by summing over all transcripts related to each gene. DESeq<sup>74</sup> was used to determine the reliability of our replicates and found that one infected MLN sample was an outlier (ERS167950). This was removed from further analysis. DESeq was then used to determine genes differentially expressed between different conditions. A false discovery rate of 5% was applied except where stated. GO terms enriched in differentially expressed genes were determined using innateDB<sup>76</sup> and TopGO<sup>75</sup>. Differences between naïve and infected cecum were determined using naïve samples (ERS167954, ERS167966, ERS167978, ERS167957, ERS167969 and ERS167987) and wormy samples with the worm left in (ERS167948, ERS167960, ERS167972, ERS167981). Reads mapping to *T. muris* transcripts and those mapping ambiguously were removed prior to analysis. Differences between naïve and infected MLN were determined using samples ERS167956, ERS167968, ERS167980, ERS167959, ERS167971, ERS167989 and ERS167962, ERS167974, ERS167983, ERS167953, ERS167965, ERS167977, ERS167986 respectively. A comparison was done between non-wormy infected and wormy infected cecum to show that the host immune response is not localized to the site of infection using non-wormy samples ERS167949, ERS167961, ERS167973, ERS167982, ERS167952, ERS167964, ERS167976, ERS167985 and wormy samples ERS167948, ERS167960, ERS167972 and ERS167981. In each case sequences from multiple lanes were combined for individual samples prior to analysis.

### **GWAS analysis**

We looked for whether genes that are associated with immune-mediated diseases are also enriched for those that were differentially expressed in the cecum of infected vs. uninfected mice. Lists of associated loci from published genome-wide association studies (GWAS) were extracted for four immune-mediated complex diseases: Crohn's disease, ulcerative colitis, celiac disease and type 1 diabetes, as well as two

complex traits: height and body mass index, where immune-related genes are unlikely to play a major role. Testing for enrichment was performed using a Monte Carlo simulation approach adapted from Raine et al.<sup>110</sup>, which accounts for linkage disequilibrium between associated SNPs and non-random arrangement of functionally related genes within the genome.

We filtered the list of all genes that were tested for differential expression down to those with a unique human ortholog using Ensembl. We also excluded those not labeled as protein-coding in Gencode<sup>111</sup> v17, and not located on human autosomes (GWAS often do not include the sex chromosomes). Of the 15,278 genes that remained, 574 were differentially expressed. For each disease/trait, autosomal SNPs that exceeded genome-wide significance ( $p < 5e-8$ ) in the GWAS with the largest sample size using a European population were extracted<sup>112-116</sup>. For each differentially expressed gene, we defined a gene-region spanning +/-50kb from the transcript start/stop site. To account for the non-random clustering of genes with similar expression patterns and function<sup>117</sup>, groups of differentially expressed genes that have overlapping +/-50kb windows were combined into single gene windows. In total, 454 gene windows were constructed from the original list of 574 differentially expressed genes. For each disease/trait, an associated locus was defined as the genomic region spanning a 0.1cM window either side of the associated SNP. Recombination rates were obtained using data from the 1000 Genomes Project<sup>118</sup>. Where multiple SNPs showed overlapping windows, only the window assigned to the SNP with the most significant p-value was considered. We then counted the number of associated loci that overlap at least one differentially expressed gene-window. To assess the statistical significance of this overlap, we randomly sampled 454 genes from the full list of 15,278 genes, while ensuring that if a sampled gene has a +/-50kb window overlapping that of another previously sampled gene, then the windows are merged and these genes are only counted once. We then calculated the number of associated loci that overlap at least one of these randomly sampled lists of genes. The sampling process was repeated 100,000 times for each disease/trait, and the empirical p-value was the number times the overlap with the randomly sampled genes exceeds the overlap with the observed differentially expressed genes, divided by 100,000.



## References

78. Kozarewa, I. *et al.* Amplification-free Illumina sequencing-library preparation facilitates improved mapping and assembly of (G+C)-biased genomes. *Nat Methods* 6, 291-5 (2009).
79. Bentley, D.R. *et al.* Accurate whole human genome sequencing using reversible terminator chemistry. *Nature* 456, 53-9 (2008).
80. Quail, M.A. *et al.* A large genome center's improvements to the Illumina sequencing system. *Nat Methods* 5, 1005-10 (2008).
81. Bonfield, J.K. & Whitwham, A. Gap5--editing the billion fragment sequence assembly. *Bioinformatics* 26, 1699-703 (2010).
82. Otto, T.D., Sanders, M., Berriman, M. & Newbold, C. Iterative Correction of Reference Nucleotides (iCORN) using second generation sequencing technology. *Bioinformatics* 26, 1704-7 (2010).
83. Smith, C.D. *et al.* Improved repeat identification and masking in Dipterans. *Gene* 389, 1-9 (2007).
84. Punta, M. *et al.* The Pfam protein families database. *Nucleic Acids Research* 40, D290-D301 (2012).
85. Smit, A.F.A. & Hubley, R. RepeatModeler Open-1.0. (2008-2010).
86. Smit, A.F.A., Hubley, R. & Green, P. RepeatMasker Open-3.0. (1996-2010).
87. She, R. *et al.* genBlastG: using BLAST searches to build homologous gene models. *Bioinformatics* 27, 2141-3 (2011).
88. Yook, K. *et al.* WormBase 2012: more genomes, more data, new website. *Nucleic Acids Res* 40, D735-41 (2012).
89. Otto, T.D., Dillon, G.P., Degraeve, W.S. & Berriman, M. RATT: Rapid Annotation Transfer Tool. *Nucleic Acids Res* 39, e57 (2011).
90. Altschul, S.F. *et al.* Gapped BLAST and PSI-BLAST: a new generation of protein database search programs. *Nucleic Acids Res* 25, 3389-402 (1997).
91. Slater, G.S. & Birney, E. Automated generation of heuristics for biological sequence comparison. *BMC Bioinformatics* 6, 31 (2005).
92. Nakamura, Y., Cochrane, G. & Karsch-Mizrachi, I. The International Nucleotide Sequence Database Collaboration. *Nucleic Acids Res* 41, D21-4 (2013).
93. UniProtConsortium. Update on activities at the Universal Protein Resource (UniProt) in 2013. *Nucleic Acids Res* 41, D43-7 (2013).
94. Logan-Klumpler, F.J. *et al.* GeneDB--an annotation database for pathogens. *Nucleic Acids Res* 40, D98-108 (2012).
95. Kall, L., Krogh, A. & Sonnhammer, E.L. A combined transmembrane topology

- and signal peptide prediction method. *J Mol Biol* 338, 1027-36 (2004).
96. Letunic, I., Doerks, T. & Bork, P. SMART 6: recent updates and new developments. *Nucleic Acids Res* 37, D229-32 (2009).
  97. Hunter, S. *et al.* InterPro: the integrative protein signature database. *Nucleic Acids Res* 37, D211-5 (2009).
  98. Crooks, G.E., Hon, G., Chandonia, J.M. & Brenner, S.E. WebLogo: a sequence logo generator. *Genome Res* 14, 1188-90 (2004).
  99. Grutter, M.G., Fendrich, G., Huber, R. & Bode, W. The 2.5 Å X-ray crystal structure of the acid-stable proteinase inhibitor from human mucous secretions analysed in its complex with bovine alpha-chymotrypsin. *EMBO J* 7, 345-51 (1988).
  100. Rawlings, N.D. & Morton, F.R. The MEROPS batch BLAST: a tool to detect peptidases and their non-peptidase homologues in a genome. *Biochimie* 90, 243-59 (2008).
  101. Moriya, Y., Itoh, M., Okuda, S., Yoshizawa, A.C. & Kanehisa, M. KAAS: an automatic genome annotation and pathway reconstruction server. *Nucleic Acids Res* 35, W182-5 (2007).
  102. Felsenstein, J. PHYLIP - Phylogeny Inference Package (Version 3.2). *Cladistics* 5(1989).
  103. Rutherford, K. *et al.* Artemis: sequence visualization and annotation. *Bioinformatics* 16, 944-5 (2000).
  104. Alkan, C. *et al.* Organization and evolution of primate centromeric DNA from whole-genome shotgun sequence data. *PLoS Comput Biol* 3, 1807-18 (2007).
  105. Noe, L. & Kucherov, G. YASS: enhancing the sensitivity of DNA similarity search. *Nucleic Acids Res* 33, W540-3 (2005).
  106. Waterhouse, A.M., Procter, J.B., Martin, D.M., Clamp, M. & Barton, G.J. Jalview Version 2--a multiple sequence alignment editor and analysis workbench. *Bioinformatics* 25, 1189-91 (2009).
  107. Gaulton, A. *et al.* ChEMBL: a large-scale bioactivity database for drug discovery. *Nucleic Acids Res* 40, D1100-7 (2012).
  108. Liu, X. *et al.* The Therapeutic Target Database: an internet resource for the primary targets of approved, clinical trial and experimental drugs. *Expert Opin Ther Targets* 15, 903-12 (2011).
  109. Langmead, B. & Salzberg, S.L. Fast gapped-read alignment with Bowtie 2. *Nat Methods* 9, 357-9 (2012).
  110. Raine, T., Liu, J.Z., Anderson, C.A., Parkes, M., & Kaser, A. Generation of primary human intestinal T cell transcriptomes reveals differential expression at genetic risk loci for immune-mediated disease. *Gut* Online First: 5 May

2014. doi:10.1136/gutjnl-2013-306657

111. Harrow, J. *et al.* GENCODE: the reference human genome annotation for The ENCODE Project. *Genome Res* 22, 1760-74 (2012).
112. Jostins, L. *et al.* Host-microbe interactions have shaped the genetic architecture of inflammatory bowel disease. *Nature* 491, 119-24 (2012).
113. Trynka, G. *et al.* Dense genotyping identifies and localizes multiple common and rare variant association signals in celiac disease. *Nat Genet* 43, 1193-201 (2011).
114. Bradfield, J.P. *et al.* A genome-wide meta-analysis of six type 1 diabetes cohorts identifies multiple associated loci. *PLoS Genet* 7, e1002293 (2011).
115. Lango Allen, H. *et al.* Hundreds of variants clustered in genomic loci and biological pathways affect human height. *Nature* 467, 832-8 (2010).
116. Speliotes, E.K. *et al.* Association analyses of 249,796 individuals reveal 18 new loci associated with body mass index. *Nat Genet* 42, 937-48 (2010).
117. Hurst, L.D., Pal, C. & Lercher, M.J. The evolutionary dynamics of eukaryotic gene order. *Nat Rev Genet* 5, 299-310 (2004).
118. Genomes Project, C. *et al.* An integrated map of genetic variation from 1,092 human genomes. *Nature* 491, 56-65 (2012).
